# Supplementary material for: Targeting MYCN-Driven Transcription By BET-Bromodomain Inhibition
Source: Oxford University Press journal article supplement (doi:10.1158/1078-0432.ccr-15-1449), 2015-12-02
Supplement: 10780432ccr151449-sup-151434_1_supp_3180666_nw2ppk.xlsx [file 10780432ccr151449-sup-151434_1_supp_3180666_nw2ppk.xlsx]

## Sheet: TSS_hg19_pm2kb_PL_bwamemHg19_Ch
Gene	log2(Brd4 ratio DMSO:OTX)	FC
RAB40A	2.5558	-5.87993
EYA1	2.281	-4.86015
TCF4	2.2079	-4.62002
HIST1H4E	2.0072	-4.02001
RFX3	1.9146	-3.77009
RNASEH2B-AS1	1.9069	-3.75002
CXorf30	1.8992	-3.73006
HIST2H2AA3	1.8639	-3.6399
MYEF2	1.86	-3.63008
SNORD28	1.84	-3.5801
SMC6	1.8359	-3.56994
GEN1	1.8359	-3.56994
SNORD29	1.8278	-3.54995
PER4	1.7866	-3.45001
LINC00597	1.7866	-3.45001
UBE2M	1.757	-3.37995
CFHR4	1.757	-3.37995
KLF7	1.7527	-3.36989
SNORD27	1.7485	-3.36009
SNORD60	1.7355	-3.32995
RPGR	1.7312	-3.32004
PHYHIPL	1.7181	-3.29003
CNTN3	1.7049	-3.26006
SPIN2B	1.7004	-3.24991
HIST2H3C	1.696	-3.24001
FABP5P3	1.6915	-3.22992
LOC100131691	1.6826	-3.21006
TUSC7	1.669	-3.17994
MIR5684	1.669	-3.17994
NFE2L2	1.6645	-3.17004
SNORD114-11	1.6415	-3.1199
ATG10	1.6323	-3.10007
MIR302F	1.6276	-3.08999
USP11	1.6229	-3.07994
SNORA4	1.5993	-3.02996
NETO2	1.5945	-3.0199
SNORD26	1.5801	-2.98991
HIST1H1E	1.5705	-2.97008
GPR125	1.5656	-2.96001
TMEM187	1.546	-2.92006
RBM11	1.546	-2.92006
NUP93	1.546	-2.92006
CYB5D2	1.546	-2.92006
KLRC3	1.541	-2.90996
DIAPH3	1.5361	-2.90009
HNRNPF	1.5311	-2.89006
STT3B	1.5261	-2.88006
SNORD30	1.5261	-2.88006
MIR7845	1.516	-2.85997
HIST1H2BD	1.516	-2.85997
SNHG1	1.5059	-2.84002
RPS19	1.5059	-2.84002
RNASEH2B	1.5059	-2.84002
MTBP	1.5059	-2.84002
MRPL13	1.5059	-2.84002
CASP5	1.5008	-2.83
SLC3A2	1.4906	-2.81006
PKIB	1.4906	-2.81006
HIST2H2BC	1.4906	-2.81006
GSE1	1.4906	-2.81006
MYOT	1.4854	-2.79995
MEF2C	1.4854	-2.79995
MAPK8	1.4803	-2.79007
CMSS1	1.4803	-2.79007
TRAF7	1.4751	-2.78003
GRIA4	1.4751	-2.78003
UGT2A2	1.4699	-2.77003
TBC1D7	1.4699	-2.77003
WDR43	1.4594	-2.74994
SNORD25	1.4594	-2.74994
MIR514A2	1.4594	-2.74994
SET	1.4542	-2.74005
MIR5692B	1.4542	-2.74005
IRF2BP2	1.4542	-2.74005
EGR1	1.4542	-2.74005
SLC35G2	1.4489	-2.73
ERC1	1.4489	-2.73
RAD23B	1.4383	-2.71001
PANK3	1.4383	-2.71001
OR5AK4P	1.433	-2.70008
MRPS30	1.433	-2.70008
HIST1H3H	1.433	-2.70008
TFDP2	1.4276	-2.68999
HIST2H4B	1.4276	-2.68999
SNORA63	1.4222	-2.67994
LOC100289230	1.4222	-2.67994
CERS6	1.4222	-2.67994
STAMBPL1	1.4168	-2.66993
SOGA3	1.4168	-2.66993
MAGEE1	1.4168	-2.66993
DHX35	1.4168	-2.66993
SNHG8	1.4114	-2.65995
HMGB2	1.4114	-2.65995
FILIP1L	1.4114	-2.65995
TARSL2	1.406	-2.65001
N4BP2	1.406	-2.65001
LOC100131655	1.406	-2.65001
CHD2	1.406	-2.65001
ANKRD17	1.406	-2.65001
ZZEF1	1.4005	-2.63993
MIR548F4	1.4005	-2.63993
ITGB1	1.4005	-2.63993
CYLC2	1.4005	-2.63993
ACVR2A	1.4005	-2.63993
TPP2	1.3951	-2.63007
PFN2	1.3951	-2.63007
DKFZP434L187	1.3951	-2.63007
GUCY1A3	1.3896	-2.62006
ERMARD	1.384	-2.60991
XIAP	1.3785	-2.59998
TSPAN6	1.3785	-2.59998
TM9SF3	1.3785	-2.59998
HDHD1	1.3785	-2.59998
ARL5A	1.3785	-2.59998
ACTG1	1.3785	-2.59998
SNORA64	1.373	-2.59009
MTHFS	1.373	-2.59009
MFAP3L	1.373	-2.59009
TMX4	1.3674	-2.58005
TCTE3	1.3674	-2.58005
SKIDA1	1.3674	-2.58005
QSER1	1.3674	-2.58005
MIR764	1.3674	-2.58005
MIR4705	1.3674	-2.58005
TRAF3IP2-AS1	1.3618	-2.57006
SMARCC1	1.3618	-2.57006
SLC22A4	1.3618	-2.57006
PFKFB1	1.3618	-2.57006
MAT2A	1.3618	-2.57006
LOC100630918	1.3618	-2.57006
KCTD15	1.3618	-2.57006
ZNF783	1.3561	-2.55992
REV3L	1.3561	-2.55992
PDE7A	1.3561	-2.55992
EPHA7	1.3561	-2.55992
CFL2	1.3561	-2.55992
PACRGL	1.3505	-2.55
HSPA8	1.3505	-2.55
WNK1	1.3448	-2.53995
SNORA24	1.3448	-2.53995
SERTAD2	1.3448	-2.53995
HNRNPA1P10	1.3448	-2.53995
GPR150	1.3448	-2.53995
CBX5	1.3448	-2.53995
PBLD	1.3391	-2.52993
MTMR2	1.3391	-2.52993
LINGO2	1.3391	-2.52993
HNRNPA1	1.3391	-2.52993
ZNF276	1.3334	-2.51996
RAB39A	1.3334	-2.51996
HIST2H2BF	1.3334	-2.51996
HIST2H2AC	1.3334	-2.51996
GSK3B	1.3334	-2.51996
ZBBX	1.3277	-2.51002
SLC25A28	1.3277	-2.51002
MIR92B	1.3277	-2.51002
HIST1H2AC	1.3277	-2.51002
FAM120AOS	1.3277	-2.51002
WDR41	1.3219	-2.49995
TMEM123	1.3219	-2.49995
PCDH11X	1.3219	-2.49995
LOC646903	1.3219	-2.49995
RPS14	1.3161	-2.48992
LOC100506834	1.3161	-2.48992
INTS6	1.3161	-2.48992
IDS	1.3161	-2.48992
HOMER1	1.3161	-2.48992
HIST2H2BE	1.3161	-2.48992
GLUD1	1.3161	-2.48992
FAM35A	1.3161	-2.48992
EFCAB2	1.3161	-2.48992
DUT	1.3161	-2.48992
DPYSL2	1.3161	-2.48992
CDC37	1.3161	-2.48992
PET112	1.3103	-2.47993
LOC729950	1.3103	-2.47993
LMO4	1.3103	-2.47993
CFL1	1.3103	-2.47993
CELF2	1.3103	-2.47993
ZNF668	1.3045	-2.46998
SETD7	1.3045	-2.46998
LAGE3	1.3045	-2.46998
INTS6-AS1	1.3045	-2.46998
PMS1	1.2987	-2.46007
ORMDL1	1.2987	-2.46007
NAB2	1.2987	-2.46007
HIST1H2BC	1.2987	-2.46007
BEX1	1.2987	-2.46007
SMAD2	1.2928	-2.45003
RRM2	1.2928	-2.45003
HIST2H3D	1.2928	-2.45003
HIST2H2AB	1.2928	-2.45003
HCFC1	1.2928	-2.45003
C12orf61	1.2928	-2.45003
ATG16L2	1.2928	-2.45003
ZBTB41	1.2869	-2.44003
SBF2	1.2869	-2.44003
MSRA	1.2869	-2.44003
MIRLET7I	1.2869	-2.44003
FUT9	1.2869	-2.44003
CENPJ	1.2869	-2.44003
C17orf82	1.2869	-2.44003
ADK	1.2869	-2.44003
WNK3	1.281	-2.43007
TNPO1	1.281	-2.43007
MIR1181	1.281	-2.43007
MFSD11	1.281	-2.43007
KANSL1L	1.281	-2.43007
GPC6	1.281	-2.43007
FOSL2	1.281	-2.43007
FBXO18	1.281	-2.43007
EIF5	1.281	-2.43007
DDX3X	1.281	-2.43007
CIRBP-AS1	1.281	-2.43007
ARHGAP5	1.281	-2.43007
NEK7	1.275	-2.41999
MIR636	1.275	-2.41999
MIR5047	1.275	-2.41999
ARHGAP5-AS1	1.275	-2.41999
ABCB7	1.275	-2.41999
ZMAT1	1.269	-2.40994
VPS9D1	1.269	-2.40994
SYNCRIP	1.269	-2.40994
SRSF2	1.269	-2.40994
MSTN	1.269	-2.40994
MIR4444-1	1.269	-2.40994
MIR3662	1.269	-2.40994
MIR17HG	1.269	-2.40994
KDM6A	1.269	-2.40994
ENY2	1.269	-2.40994
CIRBP	1.269	-2.40994
BCOR	1.269	-2.40994
NUDCD1	1.263	-2.39994
MIR8060	1.263	-2.39994
LOC100652758	1.263	-2.39994
HNRNPR	1.263	-2.39994
FHL2	1.263	-2.39994
DHFR	1.263	-2.39994
ANKRD16	1.263	-2.39994
RSRC1	1.257	-2.38998
RPL39	1.257	-2.38998
MIR3064	1.257	-2.38998
LINC00959	1.257	-2.38998
LINC00333	1.257	-2.38998
GPC5-AS1	1.257	-2.38998
EPM2A	1.257	-2.38998
CCNA2	1.257	-2.38998
ZC3H6	1.251	-2.38006
SESN1	1.251	-2.38006
RUNX1	1.251	-2.38006
RP9P	1.251	-2.38006
RGS2	1.251	-2.38006
POLR2A	1.251	-2.38006
KDM3A	1.251	-2.38006
H3F3A	1.251	-2.38006
EEA1	1.251	-2.38006
WRNIP1	1.2449	-2.37002
TRIM44	1.2449	-2.37002
RIOK1	1.2449	-2.37002
MIR17	1.2449	-2.37002
MALAT1	1.2449	-2.37002
HIPK3	1.2449	-2.37002
H3F3AP4	1.2449	-2.37002
GFOD1	1.2449	-2.37002
GAPDH	1.2449	-2.37002
CBX3	1.2449	-2.37002
SNORD61	1.2388	-2.36002
SLC44A1	1.2388	-2.36002
MTR	1.2388	-2.36002
MFF	1.2388	-2.36002
HNRNPH3	1.2388	-2.36002
HNRNPA3	1.2388	-2.36002
CHN1	1.2388	-2.36002
BTF3	1.2388	-2.36002
AGL	1.2388	-2.36002
ZBTB4	1.2327	-2.35006
RFESD	1.2327	-2.35006
NEAT1	1.2327	-2.35006
ETF1	1.2327	-2.35006
C16orf72	1.2327	-2.35006
ZMAT3	1.2265	-2.33999
SP3	1.2265	-2.33999
SNORD31	1.2265	-2.33999
SLMO1	1.2265	-2.33999
OR5D13	1.2265	-2.33999
MPHOSPH6	1.2265	-2.33999
MBNL3	1.2265	-2.33999
LOC654841	1.2265	-2.33999
LINC00577	1.2265	-2.33999
KIAA0430	1.2265	-2.33999
HNRNPU	1.2265	-2.33999
G3BP1	1.2265	-2.33999
ENO1-AS1	1.2265	-2.33999
COX20	1.2265	-2.33999
SCO1	1.2203	-2.32995
RAI14	1.2203	-2.32995
LOC643770	1.2203	-2.32995
HNRNPA2B1	1.2203	-2.32995
FAM149A	1.2203	-2.32995
ZRANB3	1.2141	-2.31996
UQCC2	1.2141	-2.31996
TEAD2	1.2141	-2.31996
SLC9B2	1.2141	-2.31996
SEPHS1	1.2141	-2.31996
RPA3-AS1	1.2141	-2.31996
PTRHD1	1.2141	-2.31996
PPIP5K2	1.2141	-2.31996
POLA1	1.2141	-2.31996
GIN1	1.2141	-2.31996
ACTB	1.2141	-2.31996
WDR74	1.2079	-2.31001
TMEM246	1.2079	-2.31001
STMN1	1.2079	-2.31001
SREK1	1.2079	-2.31001
SEC16A	1.2079	-2.31001
POLI	1.2079	-2.31001
PARP4	1.2079	-2.31001
NET1	1.2079	-2.31001
MEX3B	1.2079	-2.31001
MAPRE2	1.2079	-2.31001
KMT2C	1.2079	-2.31001
KLC1	1.2079	-2.31001
EIF4G2	1.2079	-2.31001
CUL1	1.2079	-2.31001
ZBTB5	1.2016	-2.29995
WHSC1L1	1.2016	-2.29995
STAG2	1.2016	-2.29995
SMIM15	1.2016	-2.29995
PABPC1	1.2016	-2.29995
LOC344967	1.2016	-2.29995
LEPR	1.2016	-2.29995
HNRNPD	1.2016	-2.29995
C9orf156	1.2016	-2.29995
C5orf30	1.2016	-2.29995
BUD13	1.2016	-2.29995
ZNF646	1.1953	-2.28992
ZBTB25	1.1953	-2.28992
RRAGB	1.1953	-2.28992
PDIA3	1.1953	-2.28992
NDUFA4	1.1953	-2.28992
MIR3917	1.1953	-2.28992
MFSD3	1.1953	-2.28992
ID3	1.1953	-2.28992
CEP57L1	1.1953	-2.28992
SORCS1	1.189	-2.27995
NCOR2	1.189	-2.27995
KEAP1	1.189	-2.27995
HIST1H2AK	1.189	-2.27995
GCN1L1	1.189	-2.27995
FBXL4	1.189	-2.27995
CTPS2	1.189	-2.27995
C10orf25	1.189	-2.27995
ARMC8	1.189	-2.27995
ADH1B	1.189	-2.27995
ZNF260	1.1827	-2.27001
ZFP36L1	1.1827	-2.27001
TEF	1.1827	-2.27001
SKIL	1.1827	-2.27001
PPP2R3A	1.1827	-2.27001
MIR3188	1.1827	-2.27001
MIR18A	1.1827	-2.27001
MEX3C	1.1827	-2.27001
FASN	1.1827	-2.27001
ENO1	1.1827	-2.27001
DMTF1	1.1827	-2.27001
CHD3	1.1827	-2.27001
CENPO	1.1827	-2.27001
BZW1	1.1827	-2.27001
BRD2	1.1827	-2.27001
SMO	1.1763	-2.25996
PDHX	1.1763	-2.25996
NDE1	1.1763	-2.25996
MTF2	1.1763	-2.25996
MIR484	1.1763	-2.25996
MIR4767	1.1763	-2.25996
KATNAL1	1.1763	-2.25996
HIST1H2BN	1.1763	-2.25996
G3BP2	1.1763	-2.25996
DMRTA1	1.1763	-2.25996
CLIC3	1.1763	-2.25996
BFSP1	1.1763	-2.25996
ZNF337	1.1699	-2.24996
ZNF22	1.1699	-2.24996
ZBTB1	1.1699	-2.24996
SHOC2	1.1699	-2.24996
PKNOX1	1.1699	-2.24996
OR6C4	1.1699	-2.24996
LOX	1.1699	-2.24996
HSF2	1.1699	-2.24996
GGH	1.1699	-2.24996
FAM155A-IT1	1.1699	-2.24996
CATSPER2P1	1.1699	-2.24996
ALX1	1.1699	-2.24996
ZNF706	1.1635	-2.24
ZMYND11	1.1635	-2.24
TMEM237	1.1635	-2.24
NOL7	1.1635	-2.24
MSANTD2	1.1635	-2.24
MIR4754	1.1635	-2.24
MDH1B	1.1635	-2.24
JUND	1.1635	-2.24
HOXD8	1.1635	-2.24
EXOSC9	1.1635	-2.24
BVES	1.1635	-2.24
XRN2	1.157	-2.22993
USP22	1.157	-2.22993
SLC16A9	1.157	-2.22993
RPS12	1.157	-2.22993
PRSS12	1.157	-2.22993
MZT2A	1.157	-2.22993
LPHN2	1.157	-2.22993
DHRS12	1.157	-2.22993
ADPRM	1.157	-2.22993
TMEM217	1.1506	-2.22006
TDRD3	1.1506	-2.22006
SERBP1	1.1506	-2.22006
RNF141	1.1506	-2.22006
MUC1	1.1506	-2.22006
MRVI1-AS1	1.1506	-2.22006
KLHL23	1.1506	-2.22006
GTF2A1	1.1506	-2.22006
ELAVL4	1.1506	-2.22006
WBP4	1.144	-2.20993
VAPA	1.144	-2.20993
TBC1D22B	1.144	-2.20993
2015-09-02	1.144	-2.20993
R3HDM1	1.144	-2.20993
OSGEPL1-AS1	1.144	-2.20993
MIR4784	1.144	-2.20993
LOC100507557	1.144	-2.20993
LMNB1	1.144	-2.20993
HIST1H4H	1.144	-2.20993
FANCL	1.144	-2.20993
DARS	1.144	-2.20993
BBIP1	1.144	-2.20993
ZNF827	1.1375	-2.19999
UBC	1.1375	-2.19999
RBBP6	1.1375	-2.19999
G2E3	1.1375	-2.19999
E2F8	1.1375	-2.19999
DNLZ	1.1375	-2.19999
DENND6A	1.1375	-2.19999
BMPR1A	1.1375	-2.19999
BAZ2B	1.1375	-2.19999
TGIF1	1.1309	-2.18995
RBM39	1.1309	-2.18995
PCBP1	1.1309	-2.18995
OR5D14	1.1309	-2.18995
NPAT	1.1309	-2.18995
HIST1H3B	1.1309	-2.18995
DKKL1	1.1309	-2.18995
DCAF17	1.1309	-2.18995
CUL3	1.1309	-2.18995
CDCA7	1.1309	-2.18995
CCDC15	1.1309	-2.18995
ATM	1.1309	-2.18995
ABCC1	1.1309	-2.18995
ZNF821	1.1243	-2.17996
TCAIM	1.1243	-2.17996
SRSF7	1.1243	-2.17996
SNORD12B	1.1243	-2.17996
SH3BP4	1.1243	-2.17996
SGK1	1.1243	-2.17996
QKI	1.1243	-2.17996
PRKAR1A	1.1243	-2.17996
PLEKHA5	1.1243	-2.17996
PHF6	1.1243	-2.17996
OR4K2	1.1243	-2.17996
NANP	1.1243	-2.17996
MEIS1	1.1243	-2.17996
LINC01126	1.1243	-2.17996
LAMC1	1.1243	-2.17996
KLF16	1.1243	-2.17996
JADE2	1.1243	-2.17996
HIST1H2BJ	1.1243	-2.17996
H2AFX	1.1243	-2.17996
GATA3-AS1	1.1243	-2.17996
COQ2	1.1243	-2.17996
C8orf88	1.1243	-2.17996
BTAF1	1.1243	-2.17996
TBC1D16	1.1177	-2.17001
RNF6	1.1177	-2.17001
PIGW	1.1177	-2.17001
MIR5188	1.1177	-2.17001
LOC100507283	1.1177	-2.17001
LOC100505878	1.1177	-2.17001
KIAA0368	1.1177	-2.17001
HSP90AA1	1.1177	-2.17001
HNRNPK	1.1177	-2.17001
CAPRIN1	1.1177	-2.17001
CAGE1	1.1177	-2.17001
C9orf172	1.1177	-2.17001
C1orf43	1.1177	-2.17001
ATP11A	1.1177	-2.17001
ATOH7	1.1177	-2.17001
ZNF280B	1.111	-2.15995
VIM	1.111	-2.15995
UBAP2L	1.111	-2.15995
TBL1XR1	1.111	-2.15995
SUV39H2	1.111	-2.15995
PER1	1.111	-2.15995
PANK1	1.111	-2.15995
NCAPD2	1.111	-2.15995
GPD2	1.111	-2.15995
FASTK	1.111	-2.15995
C9orf163	1.111	-2.15995
ZNF236	1.1043	-2.14995
WASF3	1.1043	-2.14995
TMCO5B	1.1043	-2.14995
SNORD2	1.1043	-2.14995
SMPDL3A	1.1043	-2.14995
PTGES2	1.1043	-2.14995
PROSER1	1.1043	-2.14995
PCBP1-AS1	1.1043	-2.14995
MYO19	1.1043	-2.14995
LINC00113	1.1043	-2.14995
GABPB1	1.1043	-2.14995
FBXO31	1.1043	-2.14995
FASTKD2	1.1043	-2.14995
ETS1	1.1043	-2.14995
DYNLRB2	1.1043	-2.14995
CREB1	1.1043	-2.14995
CLEC12B	1.1043	-2.14995
CAD	1.1043	-2.14995
SUV420H1	1.0976	-2.13998
SMAD1	1.0976	-2.13998
SGMS1	1.0976	-2.13998
SEC61G	1.0976	-2.13998
RPAP2	1.0976	-2.13998
PHTF1	1.0976	-2.13998
NKRF	1.0976	-2.13998
MIR873	1.0976	-2.13998
MAD2L1	1.0976	-2.13998
JKAMP	1.0976	-2.13998
GPBP1L1	1.0976	-2.13998
FLJ10038	1.0976	-2.13998
E2F7	1.0976	-2.13998
CCNL1	1.0976	-2.13998
C11orf58	1.0976	-2.13998
ATRNL1	1.0976	-2.13998
ASF1A	1.0976	-2.13998
ADH7	1.0976	-2.13998
UBA5	1.0909	-2.13007
RMI1	1.0909	-2.13007
RBL1	1.0909	-2.13007
NREP	1.0909	-2.13007
MIR302A	1.0909	-2.13007
MIR19A	1.0909	-2.13007
KIAA1586	1.0909	-2.13007
KIAA1377	1.0909	-2.13007
HIST1H3D	1.0909	-2.13007
HIST1H2BF	1.0909	-2.13007
HIST1H2AD	1.0909	-2.13007
H2AFY	1.0909	-2.13007
EIF4A2	1.0909	-2.13007
DST	1.0909	-2.13007
CACYBP	1.0909	-2.13007
APEX2	1.0909	-2.13007
ZNF81	1.0841	-2.12005
SPINK13	1.0841	-2.12005
SNORD101	1.0841	-2.12005
SMARCE1	1.0841	-2.12005
PTMA	1.0841	-2.12005
MRGBP	1.0841	-2.12005
MIR4500HG	1.0841	-2.12005
METTL8	1.0841	-2.12005
LOC729683	1.0841	-2.12005
KIAA1715	1.0841	-2.12005
GLMN	1.0841	-2.12005
EIF4EBP1	1.0841	-2.12005
DCAF16	1.0841	-2.12005
CCND1	1.0841	-2.12005
CABYR	1.0841	-2.12005
ARSB	1.0841	-2.12005
ZNF304	1.0772	-2.10994
YY1	1.0772	-2.10994
TRIM45	1.0772	-2.10994
TMEM5	1.0772	-2.10994
SNORA76	1.0772	-2.10994
PTGES2-AS1	1.0772	-2.10994
NFYA	1.0772	-2.10994
MIR1270-1	1.0772	-2.10994
MDK	1.0772	-2.10994
LIMD2	1.0772	-2.10994
KBTBD2	1.0772	-2.10994
ISPD	1.0772	-2.10994
ELOVL2-AS1	1.0772	-2.10994
CTBP1-AS2	1.0772	-2.10994
CD84	1.0772	-2.10994
ZMYM2	1.0704	-2.10002
TXNRD1	1.0704	-2.10002
TCF12	1.0704	-2.10002
SNORD104	1.0704	-2.10002
SLC10A3	1.0704	-2.10002
PRPS2	1.0704	-2.10002
PAIP1	1.0704	-2.10002
PABPN1	1.0704	-2.10002
NKIRAS1	1.0704	-2.10002
LOC646736	1.0704	-2.10002
LOC102467079	1.0704	-2.10002
L3HYPDH	1.0704	-2.10002
HS6ST2-AS1	1.0704	-2.10002
FZD6	1.0704	-2.10002
FAM86C2P	1.0704	-2.10002
ESD	1.0704	-2.10002
BCL11B	1.0704	-2.10002
ARHGEF25	1.0704	-2.10002
YWHAZ	1.0635	-2.09
TPK1	1.0635	-2.09
SUGT1	1.0635	-2.09
SALL4	1.0635	-2.09
RPL15	1.0635	-2.09
PCOLCE2	1.0635	-2.09
PCGEM1	1.0635	-2.09
NCAPG	1.0635	-2.09
MPP1	1.0635	-2.09
MIR760	1.0635	-2.09
MIR6090	1.0635	-2.09
MIR3652	1.0635	-2.09
MIR1264	1.0635	-2.09
MGME1	1.0635	-2.09
LOC102031319	1.0635	-2.09
HIST1H2AG	1.0635	-2.09
HDLBP	1.0635	-2.09
CTBP1	1.0635	-2.09
C6orf120	1.0635	-2.09
BDNF	1.0635	-2.09
AP2B1	1.0635	-2.09
ANKRD18B	1.0635	-2.09
AMOT	1.0635	-2.09
ZFYVE16	1.0566	-2.08002
SRSF6	1.0566	-2.08002
SLC20A2	1.0566	-2.08002
SETD5	1.0566	-2.08002
RABIF	1.0566	-2.08002
PPM1A	1.0566	-2.08002
OARD1	1.0566	-2.08002
NFYB	1.0566	-2.08002
MRPS33	1.0566	-2.08002
MIR1184-1	1.0566	-2.08002
LOC101928436	1.0566	-2.08002
IKBKG	1.0566	-2.08002
HSP90B1	1.0566	-2.08002
HIST1H1C	1.0566	-2.08002
CPSF6	1.0566	-2.08002
BMI1	1.0566	-2.08002
BCAR3	1.0566	-2.08002
ZFP36L2	1.0496	-2.06996
ZEB2	1.0496	-2.06996
WDR35	1.0496	-2.06996
WDR27	1.0496	-2.06996
USP25	1.0496	-2.06996
UMOD	1.0496	-2.06996
TNMD	1.0496	-2.06996
TMEM33	1.0496	-2.06996
SRSF5	1.0496	-2.06996
SOCS6	1.0496	-2.06996
SETD5-AS1	1.0496	-2.06996
SCAF4	1.0496	-2.06996
RUNX2	1.0496	-2.06996
RBMX2	1.0496	-2.06996
PTCHD4	1.0496	-2.06996
PAPD7	1.0496	-2.06996
MMAA	1.0496	-2.06996
MIR4303	1.0496	-2.06996
MAGI1-AS1	1.0496	-2.06996
LOC150776	1.0496	-2.06996
KMT2E	1.0496	-2.06996
IGF2BP1	1.0496	-2.06996
GNAS	1.0496	-2.06996
FGFR1OP2	1.0496	-2.06996
EPC1	1.0496	-2.06996
EIF3E	1.0496	-2.06996
DMD	1.0496	-2.06996
BCLAF1	1.0496	-2.06996
ZDHHC23	1.0426	-2.05994
TXLNA	1.0426	-2.05994
TGFBRAP1	1.0426	-2.05994
TBC1D15	1.0426	-2.05994
SNX5	1.0426	-2.05994
SLC39A9	1.0426	-2.05994
PYGO1	1.0426	-2.05994
PRKRA	1.0426	-2.05994
OR1J4	1.0426	-2.05994
OR10AG1	1.0426	-2.05994
MOV10	1.0426	-2.05994
MIR1256	1.0426	-2.05994
MATR3	1.0426	-2.05994
MAPK4	1.0426	-2.05994
LINC00919	1.0426	-2.05994
LANCL2	1.0426	-2.05994
KMT2E-AS1	1.0426	-2.05994
KDM7A	1.0426	-2.05994
KCTD6	1.0426	-2.05994
IQCH-AS1	1.0426	-2.05994
ILF3	1.0426	-2.05994
HIST1H4J	1.0426	-2.05994
FBXO34	1.0426	-2.05994
DUSP28	1.0426	-2.05994
DPH5	1.0426	-2.05994
CSRP2	1.0426	-2.05994
CHRAC1	1.0426	-2.05994
CDC7	1.0426	-2.05994
APIP	1.0426	-2.05994
UBALD1	1.0356	-2.04997
TSPAN31	1.0356	-2.04997
SECISBP2	1.0356	-2.04997
PARP2	1.0356	-2.04997
OR4F16	1.0356	-2.04997
MMP23B	1.0356	-2.04997
MIR5011	1.0356	-2.04997
LRRC8B	1.0356	-2.04997
LINC00271	1.0356	-2.04997
FOXN2	1.0356	-2.04997
ENTPD8	1.0356	-2.04997
CCDC40	1.0356	-2.04997
BVES-AS1	1.0356	-2.04997
BRIP1	1.0356	-2.04997
BCL11A	1.0356	-2.04997
AHI1	1.0356	-2.04997
ZBTB2	1.0286	-2.04004
TYSND1	1.0286	-2.04004
TLCD1	1.0286	-2.04004
ST3GAL1	1.0286	-2.04004
SMC3	1.0286	-2.04004
SFR1	1.0286	-2.04004
SF1	1.0286	-2.04004
RPS5	1.0286	-2.04004
RNF145	1.0286	-2.04004
PTPRR	1.0286	-2.04004
PSME4	1.0286	-2.04004
POC1B-GALNT4	1.0286	-2.04004
POC1B	1.0286	-2.04004
NRIP1	1.0286	-2.04004
MTMR1	1.0286	-2.04004
MIR548M	1.0286	-2.04004
LINC01003	1.0286	-2.04004
JHDM1D-AS1	1.0286	-2.04004
HIST1H4D	1.0286	-2.04004
HIST1H2AH	1.0286	-2.04004
F8A1	1.0286	-2.04004
DYRK1A	1.0286	-2.04004
DDX5	1.0286	-2.04004
CD164	1.0286	-2.04004
CAHM	1.0286	-2.04004
ASUN	1.0286	-2.04004
TRIM27	1.0215	-2.03003
SNORD50B	1.0215	-2.03003
SNHG5	1.0215	-2.03003
SEPSECS-AS1	1.0215	-2.03003
SEPSECS	1.0215	-2.03003
RBMX	1.0215	-2.03003
RBM14-RBM4	1.0215	-2.03003
RBM14	1.0215	-2.03003
PSTK	1.0215	-2.03003
PRMT6	1.0215	-2.03003
PM20D2	1.0215	-2.03003
PINX1	1.0215	-2.03003
PHIP	1.0215	-2.03003
PCID2	1.0215	-2.03003
NYAP2	1.0215	-2.03003
MTHFD1L	1.0215	-2.03003
MIR4451	1.0215	-2.03003
MIR302C	1.0215	-2.03003
KIAA1456	1.0215	-2.03003
ILF3-AS1	1.0215	-2.03003
HIST1H2BK	1.0215	-2.03003
FANCG	1.0215	-2.03003
ESCO2	1.0215	-2.03003
CYP7B1	1.0215	-2.03003
CUL4A	1.0215	-2.03003
BEND6	1.0215	-2.03003
AZIN1	1.0215	-2.03003
UCP2	1.0144	-2.02006
SNORD114-18	1.0144	-2.02006
SLC25A13	1.0144	-2.02006
RCC2	1.0144	-2.02006
PPIL3	1.0144	-2.02006
POLDIP3	1.0144	-2.02006
NRSN1	1.0144	-2.02006
MSH3	1.0144	-2.02006
MMGT1	1.0144	-2.02006
MIR3180-3	1.0144	-2.02006
MIR3180-2	1.0144	-2.02006
LOC100289511	1.0144	-2.02006
LDHA	1.0144	-2.02006
G6PD	1.0144	-2.02006
F8A3	1.0144	-2.02006
DPYSL5	1.0144	-2.02006
DFNB59	1.0144	-2.02006
DDX31	1.0144	-2.02006
DBNDD1	1.0144	-2.02006
CEP95	1.0144	-2.02006
CBS	1.0144	-2.02006
CBLL1	1.0144	-2.02006
C6orf62	1.0144	-2.02006
C20orf112	1.0144	-2.02006
B3GALT2	1.0144	-2.02006
ATP7A	1.0144	-2.02006
AGPAT5	1.0144	-2.02006
ADRBK2	1.0144	-2.02006
ZC3H15	1.0072	-2.01001
STARD7	1.0072	-2.01001
SNORA44	1.0072	-2.01001
SLC36A4	1.0072	-2.01001
RPS23	1.0072	-2.01001
RPPH1	1.0072	-2.01001
RBPMS-AS1	1.0072	-2.01001
RBFOX2	1.0072	-2.01001
RAPGEF4	1.0072	-2.01001
RAB3GAP2	1.0072	-2.01001
PNN	1.0072	-2.01001
PDDC1	1.0072	-2.01001
PCIF1	1.0072	-2.01001
OR8K3	1.0072	-2.01001
OR51A2	1.0072	-2.01001
NSMAF	1.0072	-2.01001
NCOR1	1.0072	-2.01001
MND1	1.0072	-2.01001
HECW2	1.0072	-2.01001
GEMIN4	1.0072	-2.01001
FOXR2	1.0072	-2.01001
EIF1AX	1.0072	-2.01001
DLEU1	1.0072	-2.01001
CRAMP1L	1.0072	-2.01001
COX18	1.0072	-2.01001
CDC42BPA	1.0072	-2.01001
CD99L2	1.0072	-2.01001
CBX3P2	1.0072	-2.01001
CAMK2N2	1.0072	-2.01001
C19orf12	1.0072	-2.01001
ANKRD62P1-PARP4P3	1.0072	-2.01001
ABHD5	1.0072	-2.01001
YARS	1	-2
WHSC1	1	-2
STARD7-AS1	1	-2
STAMBP	1	-2
STAG1	1	-2
SPIRE1	1	-2
SLC25A6	1	-2
SLAIN1	1	-2
SH3YL1	1	-2
RPRD2	1	-2
RHNO1	1	-2
PPP1R3A	1	-2
PPM1D	1	-2
MIR191	1	-2
MEPCE	1	-2
LOC727924	1	-2
LINC01111	1	-2
LDHB	1	-2
KANSL1	1	-2
GTF3C4	1	-2
GDI2	1	-2
GAS8	1	-2
FANCF	1	-2
ELOVL2	1	-2
AVEN	1	-2
ATF4	1	-2
ACP1	1	-2
XPO6	0.9928	-1.99004
TMEM254	0.9928	-1.99004
TBCA	0.9928	-1.99004
TAF4	0.9928	-1.99004
SLC38A2	0.9928	-1.99004
RNU12	0.9928	-1.99004
PSIP1	0.9928	-1.99004
PNRC2	0.9928	-1.99004
PKM	0.9928	-1.99004
PDE1A	0.9928	-1.99004
OFD1	0.9928	-1.99004
NKAPP1	0.9928	-1.99004
MRPL51	0.9928	-1.99004
MIA3	0.9928	-1.99004
MEIS1-AS3	0.9928	-1.99004
2015-03-06	0.9928	-1.99004
LMF1	0.9928	-1.99004
KLRC2	0.9928	-1.99004
ISYNA1	0.9928	-1.99004
HIST1H2AI	0.9928	-1.99004
DLEU2	0.9928	-1.99004
DDX28	0.9928	-1.99004
CTC1	0.9928	-1.99004
CNN3	0.9928	-1.99004
CDH18	0.9928	-1.99004
CDC5L	0.9928	-1.99004
CCDC3	0.9928	-1.99004
CARD18	0.9928	-1.99004
BDH1	0.9928	-1.99004
AVPR1A	0.9928	-1.99004
ZNF397	0.9855	-1.98
ZFX-AS1	0.9855	-1.98
ZFX	0.9855	-1.98
ZC3H4	0.9855	-1.98
VMA21	0.9855	-1.98
TUBGCP5	0.9855	-1.98
TMPO-AS1	0.9855	-1.98
TFG	0.9855	-1.98
SOX12	0.9855	-1.98
RUFY3	0.9855	-1.98
RCOR2	0.9855	-1.98
RBBP7	0.9855	-1.98
OSBPL1A	0.9855	-1.98
NTS	0.9855	-1.98
MORC2	0.9855	-1.98
MEI4	0.9855	-1.98
LUC7L3	0.9855	-1.98
LOC100996255	0.9855	-1.98
LOC100505679	0.9855	-1.98
LINC00682	0.9855	-1.98
LIN28B	0.9855	-1.98
IMMP2L	0.9855	-1.98
HIST1H2AB	0.9855	-1.98
GNL3	0.9855	-1.98
GCG	0.9855	-1.98
FLJ35934	0.9855	-1.98
FKBP10	0.9855	-1.98
EIF4B	0.9855	-1.98
DNAJC25-GNG10	0.9855	-1.98
DNAJC25	0.9855	-1.98
CHDC2	0.9855	-1.98
CEP44	0.9855	-1.98
BMP2K	0.9855	-1.98
USP38	0.9782	-1.97001
UBP1	0.9782	-1.97001
TRPC1	0.9782	-1.97001
TOX3	0.9782	-1.97001
TMEM164	0.9782	-1.97001
TET2	0.9782	-1.97001
SCGN	0.9782	-1.97001
RARG	0.9782	-1.97001
PUM2	0.9782	-1.97001
PPM1B	0.9782	-1.97001
NHLRC3	0.9782	-1.97001
MICU1	0.9782	-1.97001
MBD1	0.9782	-1.97001
KIF5B	0.9782	-1.97001
KAT6B	0.9782	-1.97001
HECTD1	0.9782	-1.97001
GRSF1	0.9782	-1.97001
FANCB	0.9782	-1.97001
EID2	0.9782	-1.97001
DYNC1LI1	0.9782	-1.97001
DOK6	0.9782	-1.97001
DNAAF2	0.9782	-1.97001
CDC14A	0.9782	-1.97001
APPL2	0.9782	-1.97001
AKIRIN1	0.9782	-1.97001
ABCD3	0.9782	-1.97001
ZNF423	0.9709	-1.96006
XPOT	0.9709	-1.96006
VTA1	0.9709	-1.96006
UBE2E3	0.9709	-1.96006
TXNDC15	0.9709	-1.96006
THADA	0.9709	-1.96006
SPATS2	0.9709	-1.96006
SIX5	0.9709	-1.96006
REPIN1	0.9709	-1.96006
PSMA7	0.9709	-1.96006
POU6F1	0.9709	-1.96006
PAPPA	0.9709	-1.96006
OR4K13	0.9709	-1.96006
NR2F2	0.9709	-1.96006
MTA3	0.9709	-1.96006
MRAS	0.9709	-1.96006
MIR3156-2	0.9709	-1.96006
MIR302D	0.9709	-1.96006
MAPK1	0.9709	-1.96006
LUZP2	0.9709	-1.96006
LMAN1	0.9709	-1.96006
ISCU	0.9709	-1.96006
HMGN2	0.9709	-1.96006
GK	0.9709	-1.96006
GAS1	0.9709	-1.96006
FOXM1	0.9709	-1.96006
FBXW4	0.9709	-1.96006
FAR1	0.9709	-1.96006
EPN1	0.9709	-1.96006
ELMOD2	0.9709	-1.96006
DOCK9-AS1	0.9709	-1.96006
DDX20	0.9709	-1.96006
DBIL5P	0.9709	-1.96006
CREM	0.9709	-1.96006
AVL9	0.9709	-1.96006
AP1S2	0.9709	-1.96006
ADH1A	0.9709	-1.96006
TSHZ3	0.9635	-1.95003
SOX11	0.9635	-1.95003
SMAD4	0.9635	-1.95003
SAMD8	0.9635	-1.95003
PPP1R10	0.9635	-1.95003
PDP1	0.9635	-1.95003
NME4	0.9635	-1.95003
NDUFAF3	0.9635	-1.95003
HSPD1	0.9635	-1.95003
HNRNPH1	0.9635	-1.95003
HIVEP1	0.9635	-1.95003
HDAC2	0.9635	-1.95003
GPRIN1	0.9635	-1.95003
FOXD2	0.9635	-1.95003
FAM208A	0.9635	-1.95003
ERRFI1	0.9635	-1.95003
EIF4E3	0.9635	-1.95003
DENND1A	0.9635	-1.95003
DBX2	0.9635	-1.95003
CYP2U1	0.9635	-1.95003
CXXC4	0.9635	-1.95003
CASD1	0.9635	-1.95003
ARNT2	0.9635	-1.95003
TRIB1	0.9561	-1.94006
TRAPPC6B	0.9561	-1.94006
TOB2	0.9561	-1.94006
STX17	0.9561	-1.94006
SON	0.9561	-1.94006
SNORD22	0.9561	-1.94006
SMIM19	0.9561	-1.94006
PRDM5	0.9561	-1.94006
PNISR	0.9561	-1.94006
PIGC	0.9561	-1.94006
PALM2-AKAP2	0.9561	-1.94006
PALM2	0.9561	-1.94006
NELFB	0.9561	-1.94006
NCK1	0.9561	-1.94006
MIR6512	0.9561	-1.94006
MIDN	0.9561	-1.94006
MESDC2	0.9561	-1.94006
MANBAL	0.9561	-1.94006
LUC7L2	0.9561	-1.94006
LPGAT1	0.9561	-1.94006
LONP1	0.9561	-1.94006
LOC642366	0.9561	-1.94006
LOC338799	0.9561	-1.94006
LINC01135	0.9561	-1.94006
LINC00938	0.9561	-1.94006
ISL1	0.9561	-1.94006
HSPE1-MOB4	0.9561	-1.94006
HSPE1	0.9561	-1.94006
HMGXB4	0.9561	-1.94006
GPAM	0.9561	-1.94006
FRMD6-AS1	0.9561	-1.94006
FRMD6	0.9561	-1.94006
FBXL17	0.9561	-1.94006
EXOC6	0.9561	-1.94006
DIXDC1	0.9561	-1.94006
CTNNB1	0.9561	-1.94006
COX7A2	0.9561	-1.94006
CLOCK	0.9561	-1.94006
CGGBP1	0.9561	-1.94006
CDCA4	0.9561	-1.94006
C17orf51	0.9561	-1.94006
B3GALNT2	0.9561	-1.94006
B3GALNT1	0.9561	-1.94006
AXIN1	0.9561	-1.94006
ATXN10	0.9561	-1.94006
APRT	0.9561	-1.94006
AFG3L1P	0.9561	-1.94006
ZSCAN32	0.9486	-1.93
ZNF275	0.9486	-1.93
ZCWPW1	0.9486	-1.93
UBE2D3	0.9486	-1.93
TTC28	0.9486	-1.93
TRAPPC2	0.9486	-1.93
THAP7	0.9486	-1.93
STS	0.9486	-1.93
SS18L1	0.9486	-1.93
RPL10	0.9486	-1.93
RHOBTB1	0.9486	-1.93
RBPJ	0.9486	-1.93
PTPN11	0.9486	-1.93
PPP1R13B	0.9486	-1.93
NDUFS4	0.9486	-1.93
MS4A6E	0.9486	-1.93
MIR934	0.9486	-1.93
LOC100507217	0.9486	-1.93
KANSL1-AS1	0.9486	-1.93
IPO9-AS1	0.9486	-1.93
HIAT1	0.9486	-1.93
FSCN1	0.9486	-1.93
FIGN	0.9486	-1.93
FAM199X	0.9486	-1.93
FAM162A	0.9486	-1.93
E2F5	0.9486	-1.93
CPB2-AS1	0.9486	-1.93
CD302	0.9486	-1.93
CCT6A	0.9486	-1.93
BTG3	0.9486	-1.93
ALKBH1	0.9486	-1.93
AFG3L2	0.9486	-1.93
ADNP	0.9486	-1.93
ZDHHC15	0.9411	-1.91999
TSPAN8	0.9411	-1.91999
TMEM136	0.9411	-1.91999
TLE3	0.9411	-1.91999
THNSL1	0.9411	-1.91999
THAP7-AS1	0.9411	-1.91999
SYT11	0.9411	-1.91999
SERF1B	0.9411	-1.91999
SERF1A	0.9411	-1.91999
PSPH	0.9411	-1.91999
PPM1L	0.9411	-1.91999
PLEKHM2	0.9411	-1.91999
PHF10	0.9411	-1.91999
PAQR9	0.9411	-1.91999
MIR4639	0.9411	-1.91999
MIR302B	0.9411	-1.91999
MBOAT2	0.9411	-1.91999
LOC102546228	0.9411	-1.91999
KIAA1217	0.9411	-1.91999
JUN	0.9411	-1.91999
HIST1H2BO	0.9411	-1.91999
HIST1H2AM	0.9411	-1.91999
GNN	0.9411	-1.91999
GART	0.9411	-1.91999
GALNT4	0.9411	-1.91999
FHIT	0.9411	-1.91999
FBXO5	0.9411	-1.91999
FAM76B	0.9411	-1.91999
FAM212B	0.9411	-1.91999
FAM156A	0.9411	-1.91999
FAM155B	0.9411	-1.91999
CTSO	0.9411	-1.91999
CT47A6	0.9411	-1.91999
CNBP	0.9411	-1.91999
CCNI	0.9411	-1.91999
C3orf33	0.9411	-1.91999
BSG	0.9411	-1.91999
ADAMTS19	0.9411	-1.91999
ACAD11	0.9411	-1.91999
ZNF768	0.9336	-1.91004
ZC3H10	0.9336	-1.91004
YDJC	0.9336	-1.91004
VIM-AS1	0.9336	-1.91004
USP28	0.9336	-1.91004
TUBB	0.9336	-1.91004
TM9SF4	0.9336	-1.91004
SSBP2	0.9336	-1.91004
SNORD50A	0.9336	-1.91004
SNORD115-47	0.9336	-1.91004
SCO2	0.9336	-1.91004
RNPS1	0.9336	-1.91004
RBM12	0.9336	-1.91004
RAP2C	0.9336	-1.91004
OGT	0.9336	-1.91004
MIR3688-2	0.9336	-1.91004
MIR3665	0.9336	-1.91004
LOC729970	0.9336	-1.91004
ITPKC	0.9336	-1.91004
HIST1H4K	0.9336	-1.91004
EWSR1	0.9336	-1.91004
CSTF2	0.9336	-1.91004
CPS1	0.9336	-1.91004
CPNE1	0.9336	-1.91004
CCNT2	0.9336	-1.91004
CASC10	0.9336	-1.91004
C9orf41	0.9336	-1.91004
C3orf38	0.9336	-1.91004
C12orf73	0.9336	-1.91004
ATF1	0.9336	-1.91004
ANP32B	0.9336	-1.91004
ANP32A	0.9336	-1.91004
AIG1	0.9336	-1.91004
ZCCHC11	0.926	-1.9
YIF1A	0.926	-1.9
VPS26B	0.926	-1.9
UCHL1	0.926	-1.9
UBAP2	0.926	-1.9
TSEN15	0.926	-1.9
TMPO	0.926	-1.9
TIMELESS	0.926	-1.9
TCP11L1	0.926	-1.9
TATDN1	0.926	-1.9
SUMO2	0.926	-1.9
STK3	0.926	-1.9
SNORA70	0.926	-1.9
SNORA16A	0.926	-1.9
SLC5A6	0.926	-1.9
SCD	0.926	-1.9
RIMS2	0.926	-1.9
RBM12B	0.926	-1.9
RAD51AP1	0.926	-1.9
R3HCC1L	0.926	-1.9
ORMDL2	0.926	-1.9
OR4P4	0.926	-1.9
OR4F15	0.926	-1.9
NKX6-1	0.926	-1.9
NDUFB9	0.926	-1.9
NAMPT	0.926	-1.9
MIR7851	0.926	-1.9
MIR490	0.926	-1.9
MAGIX	0.926	-1.9
MAGEB5	0.926	-1.9
LATS1	0.926	-1.9
HNRNPL	0.926	-1.9
GNB4	0.926	-1.9
FHOD1	0.926	-1.9
ESR2	0.926	-1.9
E2F3	0.926	-1.9
CPLX2	0.926	-1.9
CNNM2	0.926	-1.9
CENPBD1	0.926	-1.9
CALM2	0.926	-1.9
C9orf3	0.926	-1.9
C6orf226	0.926	-1.9
AKAP12	0.926	-1.9
ZNF711	0.9184	-1.89002
ZNF530	0.9184	-1.89002
ZFAND6	0.9184	-1.89002
UGT2B7	0.9184	-1.89002
UGT1A8	0.9184	-1.89002
UBE2R2	0.9184	-1.89002
TDO2	0.9184	-1.89002
TBC1D14	0.9184	-1.89002
SRPR	0.9184	-1.89002
SNORD42B	0.9184	-1.89002
SNORD110	0.9184	-1.89002
SNORA10	0.9184	-1.89002
SLIRP	0.9184	-1.89002
SCARB2	0.9184	-1.89002
RIC8B	0.9184	-1.89002
RGMB-AS1	0.9184	-1.89002
POLR2M	0.9184	-1.89002
PLCL2	0.9184	-1.89002
NPL	0.9184	-1.89002
MIR3143	0.9184	-1.89002
LRRC63	0.9184	-1.89002
LINC00637	0.9184	-1.89002
KLHL13	0.9184	-1.89002
KIAA1731	0.9184	-1.89002
HGSNAT	0.9184	-1.89002
H2AFY2	0.9184	-1.89002
FSIP1	0.9184	-1.89002
FBXO8	0.9184	-1.89002
CSAD	0.9184	-1.89002
CHD7	0.9184	-1.89002
CCDC149	0.9184	-1.89002
C14orf80	0.9184	-1.89002
BTBD10	0.9184	-1.89002
ATRAID	0.9184	-1.89002
AGPAT1	0.9184	-1.89002
ADRB1	0.9184	-1.89002
ZFPL1	0.9107	-1.87996
ZFP64	0.9107	-1.87996
VDAC1	0.9107	-1.87996
SMCHD1	0.9107	-1.87996
S100PBP	0.9107	-1.87996
RHBDD3	0.9107	-1.87996
REST	0.9107	-1.87996
REPS1	0.9107	-1.87996
RAB34	0.9107	-1.87996
PUM1	0.9107	-1.87996
PTPRA	0.9107	-1.87996
PTENP1-AS	0.9107	-1.87996
PPP2R2A	0.9107	-1.87996
PFN1	0.9107	-1.87996
NFX1	0.9107	-1.87996
NDRG4	0.9107	-1.87996
NCAPD3	0.9107	-1.87996
NAALAD2	0.9107	-1.87996
MYL6	0.9107	-1.87996
MUTYH	0.9107	-1.87996
MTRF1L	0.9107	-1.87996
MEIS2	0.9107	-1.87996
LRP8	0.9107	-1.87996
LOC100287944	0.9107	-1.87996
LOC100272217	0.9107	-1.87996
LMBR1L	0.9107	-1.87996
LINC00936	0.9107	-1.87996
KLF13	0.9107	-1.87996
GUSBP3	0.9107	-1.87996
GPR27	0.9107	-1.87996
FUBP3	0.9107	-1.87996
FUBP1	0.9107	-1.87996
FAM184A	0.9107	-1.87996
DMC1	0.9107	-1.87996
COCH	0.9107	-1.87996
CLEC1B	0.9107	-1.87996
CENPP	0.9107	-1.87996
CDCA5	0.9107	-1.87996
CCNT2-AS1	0.9107	-1.87996
CCDC66	0.9107	-1.87996
ATP2A2	0.9107	-1.87996
AMD1	0.9107	-1.87996
ACOT7	0.9107	-1.87996
ZNF143	0.903	-1.86995
ZC3H13	0.903	-1.86995
UBQLN2	0.903	-1.86995
TXNDC12	0.903	-1.86995
TP53BP1	0.903	-1.86995
TMEM17	0.903	-1.86995
TADA1	0.903	-1.86995
SPINK8	0.903	-1.86995
SH3RF1	0.903	-1.86995
SETD3	0.903	-1.86995
SEC22C	0.903	-1.86995
SCMH1	0.903	-1.86995
RICTOR	0.903	-1.86995
RBBP4	0.903	-1.86995
PGAP1	0.903	-1.86995
OR4M2	0.903	-1.86995
NTN3	0.903	-1.86995
MYB	0.903	-1.86995
MTRNR2L3	0.903	-1.86995
MRPS18B	0.903	-1.86995
MON1B	0.903	-1.86995
MAT2B	0.903	-1.86995
LOC642361	0.903	-1.86995
LOC441461	0.903	-1.86995
LEPREL4	0.903	-1.86995
KIF22	0.903	-1.86995
GDNF-AS1	0.903	-1.86995
FUS	0.903	-1.86995
FOXRED1	0.903	-1.86995
FNDC3A	0.903	-1.86995
FLJ31356	0.903	-1.86995
DLX2	0.903	-1.86995
DDX19B	0.903	-1.86995
CYP51A1	0.903	-1.86995
COPB2	0.903	-1.86995
BEND3	0.903	-1.86995
ATF5	0.903	-1.86995
ZNF770	0.8953	-1.86
ZNF644	0.8953	-1.86
ZNF280D	0.8953	-1.86
ZNF174	0.8953	-1.86
UTS2B	0.8953	-1.86
UCK2	0.8953	-1.86
TSEN54	0.8953	-1.86
TMEM218	0.8953	-1.86
TFAP4	0.8953	-1.86
SNORD12	0.8953	-1.86
SNORA61	0.8953	-1.86
SDF4	0.8953	-1.86
SCAF11	0.8953	-1.86
RPL37	0.8953	-1.86
RPL23A	0.8953	-1.86
RNH1	0.8953	-1.86
PTPN2	0.8953	-1.86
PKMYT1	0.8953	-1.86
OR1C1	0.8953	-1.86
OPCML	0.8953	-1.86
ODC1	0.8953	-1.86
NUP62	0.8953	-1.86
NOL8	0.8953	-1.86
NKX1-2	0.8953	-1.86
NIF3L1	0.8953	-1.86
MXD1	0.8953	-1.86
MTX3	0.8953	-1.86
MIR7111	0.8953	-1.86
MIR301B	0.8953	-1.86
LSM10	0.8953	-1.86
LOC389906	0.8953	-1.86
KPNA4	0.8953	-1.86
KIAA1143	0.8953	-1.86
INVS	0.8953	-1.86
IBA57-AS1	0.8953	-1.86
HTRA1	0.8953	-1.86
HIST3H2A	0.8953	-1.86
HILPDA	0.8953	-1.86
HEXDC	0.8953	-1.86
GRIA2	0.8953	-1.86
GON4L	0.8953	-1.86
GLS	0.8953	-1.86
FOXO3	0.8953	-1.86
FLJ31306	0.8953	-1.86
FAM47E	0.8953	-1.86
ERP44	0.8953	-1.86
DEPDC1	0.8953	-1.86
DDX50	0.8953	-1.86
CORO1C	0.8953	-1.86
CNNM1	0.8953	-1.86
CLTC	0.8953	-1.86
BTF3L4	0.8953	-1.86
BARD1	0.8953	-1.86
ARID4A	0.8953	-1.86
ACYP2	0.8953	-1.86
ACSL3	0.8953	-1.86
ZNF446	0.8875	-1.84997
YBX1	0.8875	-1.84997
WNT7B	0.8875	-1.84997
UGT8	0.8875	-1.84997
UBE2J2	0.8875	-1.84997
TTLL7	0.8875	-1.84997
TTC28-AS1	0.8875	-1.84997
TMEM258	0.8875	-1.84997
STAM	0.8875	-1.84997
SNX30	0.8875	-1.84997
SNORD55	0.8875	-1.84997
SNORD114-19	0.8875	-1.84997
SDCBP	0.8875	-1.84997
SCAF8	0.8875	-1.84997
RNU11	0.8875	-1.84997
RNF219	0.8875	-1.84997
RBPMS	0.8875	-1.84997
PTENP1	0.8875	-1.84997
PITPNB	0.8875	-1.84997
PHPT1	0.8875	-1.84997
PDE4D	0.8875	-1.84997
PBRM1	0.8875	-1.84997
OR8B2	0.8875	-1.84997
OR4F4	0.8875	-1.84997
MYLK-AS1	0.8875	-1.84997
MLLT10	0.8875	-1.84997
MAPK10	0.8875	-1.84997
LINC00894	0.8875	-1.84997
LINC00635	0.8875	-1.84997
JAM2	0.8875	-1.84997
HSPA14	0.8875	-1.84997
HOXD13	0.8875	-1.84997
HNRNPDL	0.8875	-1.84997
HDGFRP3	0.8875	-1.84997
FMO1	0.8875	-1.84997
FLJ44635	0.8875	-1.84997
FBXO9	0.8875	-1.84997
ETV5	0.8875	-1.84997
DDX11-AS1	0.8875	-1.84997
DDX11	0.8875	-1.84997
CNOT8	0.8875	-1.84997
CHRNA7	0.8875	-1.84997
CDNF	0.8875	-1.84997
CDK1	0.8875	-1.84997
CCT7	0.8875	-1.84997
CBWD3	0.8875	-1.84997
CASP12	0.8875	-1.84997
C3orf80	0.8875	-1.84997
C1orf21	0.8875	-1.84997
C12orf4	0.8875	-1.84997
BMS1	0.8875	-1.84997
ATAD3A	0.8875	-1.84997
ARFGEF1	0.8875	-1.84997
AFF2	0.8875	-1.84997
AASDHPPT	0.8875	-1.84997
UCHL1-AS1	0.8797	-1.83999
UBE2L6	0.8797	-1.83999
TOE1	0.8797	-1.83999
TMEM229A	0.8797	-1.83999
TMEM183B	0.8797	-1.83999
TMEM183A	0.8797	-1.83999
THY1	0.8797	-1.83999
SUZ12	0.8797	-1.83999
SRRM2	0.8797	-1.83999
SRCAP	0.8797	-1.83999
SNORA28	0.8797	-1.83999
SMAD6	0.8797	-1.83999
SLC19A2	0.8797	-1.83999
SLC15A4	0.8797	-1.83999
SCARNA17	0.8797	-1.83999
SAMSN1	0.8797	-1.83999
RPRD1B	0.8797	-1.83999
RPL7L1	0.8797	-1.83999
PTPLB	0.8797	-1.83999
PROCA1	0.8797	-1.83999
PPFIA2	0.8797	-1.83999
PFAS	0.8797	-1.83999
PDK3	0.8797	-1.83999
NRBP1	0.8797	-1.83999
MIR577	0.8797	-1.83999
MIR425	0.8797	-1.83999
LOC400927	0.8797	-1.83999
LOC388152	0.8797	-1.83999
LOC100129917	0.8797	-1.83999
LINC00629	0.8797	-1.83999
IPO9	0.8797	-1.83999
HEBP2	0.8797	-1.83999
FAM203A	0.8797	-1.83999
ERLIN1	0.8797	-1.83999
ELAC1	0.8797	-1.83999
EEF1A1	0.8797	-1.83999
DPY19L3	0.8797	-1.83999
COPG2	0.8797	-1.83999
CBWD5	0.8797	-1.83999
BAZ1A	0.8797	-1.83999
ARRDC3	0.8797	-1.83999
ACAA2	0.8797	-1.83999
AARS	0.8797	-1.83999
ZSWIM6	0.8718	-1.82994
ZNF428	0.8718	-1.82994
ZNF184	0.8718	-1.82994
VARS	0.8718	-1.82994
TUBB4B	0.8718	-1.82994
TTI1	0.8718	-1.82994
TSHB	0.8718	-1.82994
TPBG	0.8718	-1.82994
TOM1L2	0.8718	-1.82994
TNKS1BP1	0.8718	-1.82994
TMIGD1	0.8718	-1.82994
SV2C	0.8718	-1.82994
SUCLG1	0.8718	-1.82994
SPATA7	0.8718	-1.82994
SIAH1	0.8718	-1.82994
SEMA5B	0.8718	-1.82994
SAP130	0.8718	-1.82994
RPS8	0.8718	-1.82994
RPLP1	0.8718	-1.82994
RHOBTB3	0.8718	-1.82994
PRPF38B	0.8718	-1.82994
PCNP	0.8718	-1.82994
OR51M1	0.8718	-1.82994
OGFOD3	0.8718	-1.82994
NUP153	0.8718	-1.82994
NFATC3	0.8718	-1.82994
MIR611	0.8718	-1.82994
MIR4678	0.8718	-1.82994
MIR193A	0.8718	-1.82994
METTL14	0.8718	-1.82994
MAGEA4	0.8718	-1.82994
LOC644656	0.8718	-1.82994
LOC401980	0.8718	-1.82994
LOC340107	0.8718	-1.82994
LOC146481	0.8718	-1.82994
LINC00989	0.8718	-1.82994
ID1	0.8718	-1.82994
HIST1H2BL	0.8718	-1.82994
GPR111	0.8718	-1.82994
GLI3	0.8718	-1.82994
FER	0.8718	-1.82994
FAM208B	0.8718	-1.82994
FAM104B	0.8718	-1.82994
ERGIC3	0.8718	-1.82994
CREBBP	0.8718	-1.82994
CCDC85B	0.8718	-1.82994
CASK	0.8718	-1.82994
AURKB	0.8718	-1.82994
ATP6V0C	0.8718	-1.82994
ANKRD36	0.8718	-1.82994
ANKRD10	0.8718	-1.82994
ABCB6	0.8718	-1.82994
ZSCAN2	0.8639	-1.81995
ZNF367	0.8639	-1.81995
ZNF219	0.8639	-1.81995
YWHAQ	0.8639	-1.81995
USP47	0.8639	-1.81995
UHRF1	0.8639	-1.81995
TSC1	0.8639	-1.81995
TBC1D9	0.8639	-1.81995
SUGT1P3	0.8639	-1.81995
SOX8	0.8639	-1.81995
SNORA81	0.8639	-1.81995
SNCA	0.8639	-1.81995
SH3BP2	0.8639	-1.81995
RPS29	0.8639	-1.81995
RPS11	0.8639	-1.81995
RNF7	0.8639	-1.81995
RASSF9	0.8639	-1.81995
PRR24	0.8639	-1.81995
PPP1R3E	0.8639	-1.81995
PNRC1	0.8639	-1.81995
PIK3R3	0.8639	-1.81995
PAK6	0.8639	-1.81995
OR5B12	0.8639	-1.81995
NPM1	0.8639	-1.81995
NEFM	0.8639	-1.81995
MIR564	0.8639	-1.81995
MIR4466	0.8639	-1.81995
MIR130B	0.8639	-1.81995
MIR125B1	0.8639	-1.81995
MIR1248	0.8639	-1.81995
MAPK1IP1L	0.8639	-1.81995
LOC647323	0.8639	-1.81995
LIPT2	0.8639	-1.81995
LINC00909	0.8639	-1.81995
LINC00632	0.8639	-1.81995
KIAA0895	0.8639	-1.81995
KDM4A-AS1	0.8639	-1.81995
IRS2	0.8639	-1.81995
IMPDH2	0.8639	-1.81995
HSCB	0.8639	-1.81995
HNRNPKP3	0.8639	-1.81995
HAND2-AS1	0.8639	-1.81995
HAND2	0.8639	-1.81995
GUF1	0.8639	-1.81995
GNPNAT1	0.8639	-1.81995
GLDC	0.8639	-1.81995
FOXK2	0.8639	-1.81995
FLJ13224	0.8639	-1.81995
FEN1	0.8639	-1.81995
EZH2	0.8639	-1.81995
ERH	0.8639	-1.81995
ECHDC1	0.8639	-1.81995
DPP3	0.8639	-1.81995
CTNNA2	0.8639	-1.81995
CDKN1B	0.8639	-1.81995
CD47	0.8639	-1.81995
C9orf169	0.8639	-1.81995
ANLN	0.8639	-1.81995
AKAP1	0.8639	-1.81995
ADCK4	0.8639	-1.81995
ZNF521	0.856	-1.81001
ZNF141	0.856	-1.81001
ZMIZ2	0.856	-1.81001
ZFYVE26	0.856	-1.81001
WARS2	0.856	-1.81001
TXNDC5	0.856	-1.81001
TRA2B	0.856	-1.81001
TPTE2P5	0.856	-1.81001
SRRM2-AS1	0.856	-1.81001
SNRPA1	0.856	-1.81001
SNORD113-7	0.856	-1.81001
SNHG9	0.856	-1.81001
SLC25A22	0.856	-1.81001
SEMA3E	0.856	-1.81001
SCRT1	0.856	-1.81001
SBF1	0.856	-1.81001
RPS2	0.856	-1.81001
RCOR3	0.856	-1.81001
RBBP8	0.856	-1.81001
RAD23A	0.856	-1.81001
RAB9B	0.856	-1.81001
PTGDS	0.856	-1.81001
PRDM10	0.856	-1.81001
PIAS2	0.856	-1.81001
PGR	0.856	-1.81001
ORC2	0.856	-1.81001
NRG2	0.856	-1.81001
NME6	0.856	-1.81001
NDUFA10	0.856	-1.81001
MIR4741	0.856	-1.81001
MIR4693	0.856	-1.81001
MIR1915	0.856	-1.81001
MEMO1	0.856	-1.81001
LSM14A	0.856	-1.81001
LOC286367	0.856	-1.81001
LOC101054525	0.856	-1.81001
LMBRD1	0.856	-1.81001
LINC00886	0.856	-1.81001
LINC00326	0.856	-1.81001
LIFR	0.856	-1.81001
KIF27	0.856	-1.81001
KIAA0391	0.856	-1.81001
HPDL	0.856	-1.81001
HDAC4	0.856	-1.81001
GUCY1A2	0.856	-1.81001
GHR	0.856	-1.81001
FNTA	0.856	-1.81001
EYA2	0.856	-1.81001
EXPH5	0.856	-1.81001
EPB41	0.856	-1.81001
ENDOG	0.856	-1.81001
EIF2B5	0.856	-1.81001
EIF2B4	0.856	-1.81001
EEF1D	0.856	-1.81001
DYRK2	0.856	-1.81001
DYNLT1	0.856	-1.81001
CLIP4	0.856	-1.81001
BAZ2A	0.856	-1.81001
ATE1	0.856	-1.81001
ALG5	0.856	-1.81001
ADAT1	0.856	-1.81001
ZNF740	0.848	-1.8
ZNF24	0.848	-1.8
ZBED3-AS1	0.848	-1.8
WDR4	0.848	-1.8
VCPKMT	0.848	-1.8
UGCG	0.848	-1.8
TUG1	0.848	-1.8
TTC12	0.848	-1.8
TSHZ1	0.848	-1.8
TRIM49	0.848	-1.8
TPM4	0.848	-1.8
TMEM63A	0.848	-1.8
TMEM42	0.848	-1.8
TMEM39B	0.848	-1.8
TMEM254-AS1	0.848	-1.8
TIMM9	0.848	-1.8
TAOK1	0.848	-1.8
ST20	0.848	-1.8
SNX17	0.848	-1.8
SLTM	0.848	-1.8
SLC35E2B	0.848	-1.8
RSPH4A	0.848	-1.8
RPS17L	0.848	-1.8
RNU6-69P	0.848	-1.8
RCC1	0.848	-1.8
PRR13	0.848	-1.8
NCOA2	0.848	-1.8
MTHFD2	0.848	-1.8
MMS19	0.848	-1.8
MIR6755	0.848	-1.8
MDC1	0.848	-1.8
MAP6	0.848	-1.8
MALT1	0.848	-1.8
LOC100130093	0.848	-1.8
LINC00648	0.848	-1.8
L1CAM	0.848	-1.8
IGFBPL1	0.848	-1.8
HYLS1	0.848	-1.8
HNRNPC	0.848	-1.8
GPC6-AS2	0.848	-1.8
GLB1L	0.848	-1.8
FTL	0.848	-1.8
FSTL1	0.848	-1.8
FKBP5	0.848	-1.8
ENKUR	0.848	-1.8
EIF2AK3	0.848	-1.8
DUSP1	0.848	-1.8
DHX15	0.848	-1.8
CUX1	0.848	-1.8
CTSA	0.848	-1.8
CNTNAP3	0.848	-1.8
CDH2	0.848	-1.8
CCT2	0.848	-1.8
CCNJ	0.848	-1.8
CCNB2	0.848	-1.8
CATSPERD	0.848	-1.8
BUD31	0.848	-1.8
BRWD1	0.848	-1.8
ARRDC3-AS1	0.848	-1.8
ARMC5	0.848	-1.8
ARL17A	0.848	-1.8
ARID1B	0.848	-1.8
APPBP2	0.848	-1.8
AMMECR1	0.848	-1.8
AKIRIN2	0.848	-1.8
ABHD10	0.848	-1.8
ZFYVE9	0.84	-1.79005
ZC3H12C	0.84	-1.79005
YAP1	0.84	-1.79005
VAV2	0.84	-1.79005
USP46	0.84	-1.79005
USP1	0.84	-1.79005
TREX2	0.84	-1.79005
TIGD5	0.84	-1.79005
SNORD12C	0.84	-1.79005
SLC35D1	0.84	-1.79005
SLC17A3	0.84	-1.79005
SIRT5	0.84	-1.79005
SCRIB	0.84	-1.79005
SCML2	0.84	-1.79005
SCAMP1	0.84	-1.79005
RYBP	0.84	-1.79005
RPS7	0.84	-1.79005
REEP3	0.84	-1.79005
RBM18	0.84	-1.79005
PRTG	0.84	-1.79005
PRH1-PRR4	0.84	-1.79005
POU2F1	0.84	-1.79005
PLCG1	0.84	-1.79005
PHF8	0.84	-1.79005
PHC2	0.84	-1.79005
PCDH10	0.84	-1.79005
PAFAH1B1	0.84	-1.79005
OR4K17	0.84	-1.79005
NUTM2A-AS1	0.84	-1.79005
NUDCD3	0.84	-1.79005
NCKAP1	0.84	-1.79005
MIR3912	0.84	-1.79005
LRP11	0.84	-1.79005
LOC728769	0.84	-1.79005
LOC400684	0.84	-1.79005
LOC100505761	0.84	-1.79005
LIN9	0.84	-1.79005
KLHL42	0.84	-1.79005
KIF15	0.84	-1.79005
HLCS	0.84	-1.79005
H1FX-AS1	0.84	-1.79005
FAM168B	0.84	-1.79005
EP300	0.84	-1.79005
EIF5A2	0.84	-1.79005
EIF3A	0.84	-1.79005
EIF2AK4	0.84	-1.79005
DUSP16	0.84	-1.79005
DDX46	0.84	-1.79005
DCP1B	0.84	-1.79005
CHMP4B	0.84	-1.79005
CHMP3	0.84	-1.79005
C5orf28	0.84	-1.79005
C12orf65	0.84	-1.79005
C11orf73	0.84	-1.79005
C10orf88	0.84	-1.79005
BOC	0.84	-1.79005
BHLHE40	0.84	-1.79005
ARPC5L	0.84	-1.79005
ARL5B	0.84	-1.79005
ARID1A	0.84	-1.79005
ADAR	0.84	-1.79005
ZBTB20	0.8319	-1.78003
YIPF6	0.8319	-1.78003
VSNL1	0.8319	-1.78003
UCKL1	0.8319	-1.78003
UBTD1	0.8319	-1.78003
TTC3	0.8319	-1.78003
TSSC1	0.8319	-1.78003
TNRC6A	0.8319	-1.78003
TMEM181	0.8319	-1.78003
TCN1	0.8319	-1.78003
TCEAL3	0.8319	-1.78003
TBX18	0.8319	-1.78003
SRBD1	0.8319	-1.78003
SNORD46	0.8319	-1.78003
SMC4	0.8319	-1.78003
2015-09-07	0.8319	-1.78003
RGS17	0.8319	-1.78003
RABEPK	0.8319	-1.78003
PWP2	0.8319	-1.78003
PTPN13	0.8319	-1.78003
PPAPDC1B	0.8319	-1.78003
PIGP	0.8319	-1.78003
NDUFB6	0.8319	-1.78003
NAT10	0.8319	-1.78003
MSMO1	0.8319	-1.78003
MIR4273	0.8319	-1.78003
MIR367	0.8319	-1.78003
MAN2C1	0.8319	-1.78003
MAN1A2	0.8319	-1.78003
MALSU1	0.8319	-1.78003
KRTAP2-4	0.8319	-1.78003
KLHL12	0.8319	-1.78003
KIAA0586	0.8319	-1.78003
KDM4B	0.8319	-1.78003
IL6ST	0.8319	-1.78003
IL4I1	0.8319	-1.78003
IFT81	0.8319	-1.78003
HMGB1	0.8319	-1.78003
H1FX	0.8319	-1.78003
GYPB	0.8319	-1.78003
GTPBP4	0.8319	-1.78003
GTPBP1	0.8319	-1.78003
GABRR3	0.8319	-1.78003
GABRB3	0.8319	-1.78003
FBXO30	0.8319	-1.78003
FBXL5	0.8319	-1.78003
FARP2	0.8319	-1.78003
FANCC	0.8319	-1.78003
FADS2	0.8319	-1.78003
F8	0.8319	-1.78003
ELAVL2	0.8319	-1.78003
DNAJC16	0.8319	-1.78003
DHX36	0.8319	-1.78003
DDI2	0.8319	-1.78003
DALRD3	0.8319	-1.78003
CSNK2A1	0.8319	-1.78003
CPS1-IT1	0.8319	-1.78003
CHPF2	0.8319	-1.78003
CENPF	0.8319	-1.78003
CENPA	0.8319	-1.78003
C1orf198	0.8319	-1.78003
C10orf115	0.8319	-1.78003
ATXN2L	0.8319	-1.78003
ASCC3	0.8319	-1.78003
ALDH16A1	0.8319	-1.78003
ADAMTS1	0.8319	-1.78003
ZNF436	0.8237	-1.76994
ZNF35	0.8237	-1.76994
ZFR	0.8237	-1.76994
ZFAS1	0.8237	-1.76994
VAPB	0.8237	-1.76994
USP37	0.8237	-1.76994
UBR3	0.8237	-1.76994
TWSG1	0.8237	-1.76994
TSPYL1	0.8237	-1.76994
TP63	0.8237	-1.76994
TMEM87A	0.8237	-1.76994
SYAP1	0.8237	-1.76994
SUMF2	0.8237	-1.76994
SNORA78	0.8237	-1.76994
SLITRK5	0.8237	-1.76994
SLC25A40	0.8237	-1.76994
SAMD3	0.8237	-1.76994
RPS9	0.8237	-1.76994
PTTG1	0.8237	-1.76994
PSMD7	0.8237	-1.76994
PRR12	0.8237	-1.76994
PPP2R3C	0.8237	-1.76994
PKN2	0.8237	-1.76994
PI15	0.8237	-1.76994
PDIA4	0.8237	-1.76994
NUMBL	0.8237	-1.76994
NOL4	0.8237	-1.76994
MRRF	0.8237	-1.76994
MIR198	0.8237	-1.76994
MAZ	0.8237	-1.76994
MAGT1	0.8237	-1.76994
LSM5	0.8237	-1.76994
LRRC24	0.8237	-1.76994
LOC100507053	0.8237	-1.76994
LINC00652	0.8237	-1.76994
LDLR	0.8237	-1.76994
LAMP1	0.8237	-1.76994
KCNG3	0.8237	-1.76994
KBTBD3	0.8237	-1.76994
IFT140	0.8237	-1.76994
HSPB6	0.8237	-1.76994
HIST3H2BB	0.8237	-1.76994
GPM6B	0.8237	-1.76994
GFRA1	0.8237	-1.76994
GALC	0.8237	-1.76994
FGD1	0.8237	-1.76994
ELF2	0.8237	-1.76994
DSE	0.8237	-1.76994
DOPEY1	0.8237	-1.76994
DBF4	0.8237	-1.76994
CRB1	0.8237	-1.76994
COMMD8	0.8237	-1.76994
CNPPD1	0.8237	-1.76994
CEP57	0.8237	-1.76994
CAPRIN2	0.8237	-1.76994
ASXL3	0.8237	-1.76994
AP1AR	0.8237	-1.76994
AKAP11	0.8237	-1.76994
AK4	0.8237	-1.76994
ZNF529	0.8156	-1.76003
ULK3	0.8156	-1.76003
TRIM39	0.8156	-1.76003
TOMM34	0.8156	-1.76003
STL	0.8156	-1.76003
STK40	0.8156	-1.76003
STIP1	0.8156	-1.76003
ST3GAL3	0.8156	-1.76003
SNAI1	0.8156	-1.76003
SLC38A4	0.8156	-1.76003
SLC25A36	0.8156	-1.76003
SLC25A12	0.8156	-1.76003
SLC25A10	0.8156	-1.76003
SENP6	0.8156	-1.76003
ROCK2	0.8156	-1.76003
RAP1B	0.8156	-1.76003
PRPF39	0.8156	-1.76003
PPIG	0.8156	-1.76003
PPIA	0.8156	-1.76003
PPDPF	0.8156	-1.76003
PNPLA3	0.8156	-1.76003
PCNT	0.8156	-1.76003
PCBD2	0.8156	-1.76003
NEO1	0.8156	-1.76003
NAGLU	0.8156	-1.76003
NAA25	0.8156	-1.76003
MPC2	0.8156	-1.76003
MORC4	0.8156	-1.76003
MKKS	0.8156	-1.76003
MIR563	0.8156	-1.76003
MIR3661	0.8156	-1.76003
MINPP1	0.8156	-1.76003
MANSC1	0.8156	-1.76003
MAF	0.8156	-1.76003
MACROD1	0.8156	-1.76003
LOC80154	0.8156	-1.76003
LOC389895	0.8156	-1.76003
LINC00167	0.8156	-1.76003
LIFR-AS1	0.8156	-1.76003
KLHL21	0.8156	-1.76003
KDM5C	0.8156	-1.76003
FIP1L1	0.8156	-1.76003
FAM173A	0.8156	-1.76003
DYNLL2	0.8156	-1.76003
DESI2	0.8156	-1.76003
DCN	0.8156	-1.76003
CYP2C9	0.8156	-1.76003
CHD1	0.8156	-1.76003
CCDC53	0.8156	-1.76003
CCDC24	0.8156	-1.76003
CAMTA1	0.8156	-1.76003
BPIFA4P	0.8156	-1.76003
ATP6V0E1	0.8156	-1.76003
ATP5D	0.8156	-1.76003
ATP2C1	0.8156	-1.76003
ATP1B1	0.8156	-1.76003
ATOH8	0.8156	-1.76003
ASTE1	0.8156	-1.76003
ASAH1	0.8156	-1.76003
ARNTL	0.8156	-1.76003
ALDH1A3	0.8156	-1.76003
ZNF771	0.8074	-1.75005
ZNF503-AS2	0.8074	-1.75005
ZNF189	0.8074	-1.75005
ZNF18	0.8074	-1.75005
WTAP	0.8074	-1.75005
USP13	0.8074	-1.75005
TXNDC17	0.8074	-1.75005
TMEM57	0.8074	-1.75005
TARBP1	0.8074	-1.75005
STXBP5L	0.8074	-1.75005
STK39	0.8074	-1.75005
SSPN	0.8074	-1.75005
SSBP4	0.8074	-1.75005
SNX21	0.8074	-1.75005
SNORD114-10	0.8074	-1.75005
SMAD7	0.8074	-1.75005
SLCO1B7	0.8074	-1.75005
SLC41A1	0.8074	-1.75005
SEZ6L2	0.8074	-1.75005
SETD9	0.8074	-1.75005
SENP8	0.8074	-1.75005
SEH1L	0.8074	-1.75005
RBM12B-AS1	0.8074	-1.75005
PUS7	0.8074	-1.75005
PPP1CB	0.8074	-1.75005
PLTP	0.8074	-1.75005
P4HTM	0.8074	-1.75005
NFKBIA	0.8074	-1.75005
MUS81	0.8074	-1.75005
MIR3613	0.8074	-1.75005
LYRM4	0.8074	-1.75005
LTBP3	0.8074	-1.75005
LRPPRC	0.8074	-1.75005
LOC101928438	0.8074	-1.75005
LDLRAD3	0.8074	-1.75005
KRTAP22-1	0.8074	-1.75005
KLHL32	0.8074	-1.75005
KIAA0753	0.8074	-1.75005
IQSEC3	0.8074	-1.75005
[truncated: 22,297 more rows]
