# Supplementary material for: Targeting MYCN-Driven Transcription By BET-Bromodomain Inhibition
Source: Oxford University Press journal article supplement (doi:10.1158/1078-0432.ccr-15-1449), 2015-12-02
Supplement: 10780432ccr151449-sup-151434_1_supp_3180668_nw2ppl.xlsx [file 10780432ccr151449-sup-151434_1_supp_3180668_nw2ppl.xlsx]

## Sheet: OTX015_dn
NAME	SIZE	ES	NES	NOM p-val	FDR q-val	FWER p-val	RANK AT MAX	LEADING EDGE
KRAS.KIDNEY_UP.V1_DN	24	-0.805623	-1.76667	0	0.00678282	0.007	702	tags=33%, list=6%, signal=36%
ALK_DN.V1_DN	41	-0.720785	-1.71212	0.00239808	0.0160576	0.033	1291	tags=39%, list=12%, signal=44%
KRAS.600.LUNG.BREAST_UP.V1_DN	84	-0.640466	-1.65093	0	0.0426542	0.123	1735	tags=38%, list=16%, signal=45%
RELA_DN.V1_DN	32	-0.709721	-1.61221	0.00257069	0.0618335	0.229	1246	tags=44%, list=11%, signal=49%
MEL18_DN.V1_UP	65	-0.636998	-1.59084	0.00341686	0.0716742	0.31	1177	tags=32%, list=11%, signal=36%
AKT_UP.V1_DN	109	-0.605709	-1.57936	0	0.0723864	0.362	1846	tags=33%, list=17%, signal=39%
PTEN_DN.V1_DN	47	-0.652577	-1.5598	0.0070922	0.0845614	0.457	1876	tags=45%, list=17%, signal=54%
CAHOY_NEURONAL	35	-0.667819	-1.54534	0.016624	0.0913201	0.53	1553	tags=43%, list=14%, signal=50%
BMI1_DN.V1_UP	64	-0.603778	-1.5299	0.00448934	0.104202	0.619	1088	tags=30%, list=10%, signal=33%
KRAS.600_UP.V1_DN	71	-0.608507	-1.5293	0.00446429	0.0944599	0.619	1278	tags=30%, list=12%, signal=33%
AKT_UP_MTOR_DN.V1_DN	117	-0.574672	-1.5246	0.00214823	0.0913521	0.645	2199	tags=39%, list=20%, signal=49%
MYC_UP.V1_UP	138	-0.567785	-1.52446	0.0021097	0.0838996	0.645	2855	tags=49%, list=26%, signal=66%
ATF2_UP.V1_DN	90	-0.58724	-1.52003	0.00655022	0.0832629	0.671	870	tags=20%, list=8%, signal=22%
P53_DN.V2_UP	37	-0.650409	-1.51411	0.014742	0.0841539	0.706	1340	tags=32%, list=12%, signal=37%
STK33_SKM_DN	155	-0.557543	-1.50781	0.00103306	0.0870571	0.743	1868	tags=37%, list=17%, signal=44%
YAP1_UP	33	-0.651311	-1.50431	0.0221354	0.0867671	0.764	2017	tags=36%, list=18%, signal=44%
PKCA_DN.V1_UP	60	-0.598137	-1.49462	0.00465658	0.0940975	0.818	2166	tags=40%, list=20%, signal=49%
CSR_LATE_UP.V1_DN	99	-0.568592	-1.48541	0.00645161	0.100352	0.855	993	tags=21%, list=9%, signal=23%
CTIP_DN.V1_UP	25	-0.661326	-1.4683	0.043871	0.120605	0.918	1993	tags=52%, list=18%, signal=63%
BRCA1_DN.V1_UP	33	-0.634812	-1.46778	0.0317662	0.115393	0.919	792	tags=30%, list=7%, signal=33%
KRAS.300_UP.V1_DN	31	-0.638252	-1.4677	0.0458015	0.110035	0.919	692	tags=23%, list=6%, signal=24%
ESC_V6.5_UP_EARLY.V1_DN	87	-0.562885	-1.45722	0.00976139	0.119596	0.94	1013	tags=26%, list=9%, signal=29%
RAPA_EARLY_UP.V1_UP	88	-0.55647	-1.44465	0.0166297	0.134721	0.965	1849	tags=28%, list=17%, signal=34%
CRX_DN.V1_DN	76	-0.562339	-1.43675	0.0254989	0.141777	0.981	1056	tags=25%, list=10%, signal=27%
BMI1_DN_MEL18_DN.V1_DN	80	-0.562428	-1.429	0.0279642	0.151031	0.985	1618	tags=39%, list=15%, signal=45%
NFE2L2.V2	203	-0.520842	-1.42347	0.00204918	0.155921	0.99	1959	tags=29%, list=18%, signal=34%
PKCA_DN.V1_DN	79	-0.556269	-1.4188	0.025584	0.158377	0.991	1524	tags=32%, list=14%, signal=36%
STK33_DN	183	-0.516578	-1.40996	0.00618557	0.167751	0.993	2073	tags=34%, list=19%, signal=41%
WNT_UP.V1_UP	74	-0.55245	-1.40983	0.0396825	0.162232	0.993	2197	tags=38%, list=20%, signal=47%
NRL_DN.V1_UP	78	-0.551235	-1.40472	0.0407489	0.16608	0.998	1233	tags=22%, list=11%, signal=24%
P53_DN.V2_DN	69	-0.555919	-1.39711	0.0398633	0.175636	1	1219	tags=25%, list=11%, signal=28%
ALK_DN.V1_UP	48	-0.580491	-1.39642	0.0441718	0.171361	1	1340	tags=23%, list=12%, signal=26%
PIGF_UP.V1_DN	81	-0.539114	-1.38905	0.0454545	0.178196	1	2235	tags=31%, list=20%, signal=38%
KRAS.AMP.LUNG_UP.V1_UP	26	-0.62712	-1.38899	0.0822785	0.173013	1	1447	tags=35%, list=13%, signal=40%
DCA_UP.V1_UP	71	-0.542459	-1.38275	0.0423163	0.179063	1	888	tags=14%, list=8%, signal=15%
IL21_UP.V1_DN	59	-0.553666	-1.38019	0.0700117	0.178878	1	1568	tags=34%, list=14%, signal=39%
RAF_UP.V1_DN	136	-0.517613	-1.3788	0.0168955	0.176938	1	1681	tags=26%, list=15%, signal=31%
LTE2_UP.V1_UP	138	-0.509913	-1.37264	0.0175439	0.183773	1	1007	tags=16%, list=9%, signal=17%
CRX_NRL_DN.V1_UP	73	-0.537268	-1.35948	0.0638298	0.203968	1	1474	tags=29%, list=13%, signal=33%
P53_DN.V1_DN	111	-0.518137	-1.35252	0.0462863	0.213064	1	1678	tags=32%, list=15%, signal=38%
ATF2_UP.V1_UP	76	-0.524962	-1.35049	0.0602273	0.211873	1	1015	tags=17%, list=9%, signal=19%
STK33_NOMO_DN	166	-0.498352	-1.34679	0.0208117	0.214852	1	1891	tags=30%, list=17%, signal=36%
LTE2_UP.V1_DN	134	-0.499198	-1.33544	0.0401691	0.232503	1	1008	tags=22%, list=9%, signal=24%
GCNP_SHH_UP_LATE.V1_DN	108	-0.507927	-1.33475	0.044086	0.228149	1	1611	tags=27%, list=15%, signal=31%
KRAS.600.LUNG.BREAST_UP.V1_UP	76	-0.524106	-1.33271	0.0671893	0.227265	1	1903	tags=37%, list=17%, signal=44%
MEL18_DN.V1_DN	82	-0.511455	-1.33137	0.0597345	0.224899	1	1573	tags=34%, list=14%, signal=40%
BMI1_DN_MEL18_DN.V1_UP	68	-0.518509	-1.33079	0.0737798	0.221099	1	1349	tags=31%, list=12%, signal=35%
RB_P130_DN.V1_UP	73	-0.525613	-1.32728	0.083612	0.223172	1	2863	tags=45%, list=26%, signal=61%
SNF5_DN.V1_UP	92	-0.503717	-1.31778	0.0707182	0.238677	1	2112	tags=28%, list=19%, signal=35%
JNK_DN.V1_UP	78	-0.509069	-1.30834	0.0838852	0.254252	1	1235	tags=24%, list=11%, signal=27%
PRC2_EZH2_UP.V1_DN	97	-0.495003	-1.30432	0.0794342	0.259263	1	2045	tags=38%, list=18%, signal=46%
BRCA1_DN.V1_DN	60	-0.524089	-1.30283	0.0981941	0.257459	1	2730	tags=43%, list=25%, signal=57%
ATF2_S_UP.V1_UP	81	-0.502947	-1.29456	0.0822999	0.271091	1	1708	tags=32%, list=15%, signal=38%
MEK_UP.V1_UP	125	-0.483034	-1.2945	0.0623679	0.266162	1	1700	tags=31%, list=15%, signal=36%
KRAS.LUNG.BREAST_UP.V1_DN	42	-0.545072	-1.29277	0.125756	0.265631	1	1735	tags=33%, list=16%, signal=39%
SNF5_DN.V1_DN	74	-0.51129	-1.29101	0.0984513	0.264702	1	1366	tags=27%, list=12%, signal=31%
CAHOY_ASTROGLIAL	41	-0.539175	-1.28261	0.12931	0.278929	1	1258	tags=32%, list=11%, signal=36%
KRAS.DF.V1_UP	134	-0.476177	-1.27588	0.0749465	0.289572	1	807	tags=16%, list=7%, signal=17%
HOXA9_DN.V1_DN	139	-0.472438	-1.27194	0.0764398	0.293916	1	2231	tags=31%, list=20%, signal=38%
EIF4E_DN	75	-0.494514	-1.26696	0.118757	0.300924	1	911	tags=15%, list=8%, signal=16%
KRAS.BREAST_UP.V1_UP	28	-0.572579	-1.26461	0.163399	0.301618	1	1285	tags=29%, list=12%, signal=32%
LEF1_UP.V1_DN	102	-0.477148	-1.25874	0.094195	0.310728	1	1524	tags=30%, list=14%, signal=35%
EGFR_UP.V1_UP	123	-0.463164	-1.24626	0.0933192	0.33601	1	951	tags=21%, list=9%, signal=23%
RPS14_DN.V1_UP	66	-0.498217	-1.2397	0.136312	0.347486	1	928	tags=26%, list=8%, signal=28%
E2F3_UP.V1_UP	132	-0.460653	-1.23516	0.106428	0.353526	1	1963	tags=34%, list=18%, signal=41%
GLI1_UP.V1_UP	18	-0.584241	-1.22602	0.229711	0.372052	1	305	tags=11%, list=3%, signal=11%
CRX_NRL_DN.V1_DN	83	-0.47129	-1.22373	0.163934	0.37229	1	1275	tags=23%, list=12%, signal=26%
PRC2_EZH2_UP.V1_UP	126	-0.453062	-1.22077	0.142408	0.374817	1	3427	tags=51%, list=31%, signal=73%
KRAS.KIDNEY_UP.V1_UP	79	-0.473789	-1.22047	0.162921	0.370057	1	1573	tags=35%, list=14%, signal=41%
VEGF_A_UP.V1_UP	82	-0.470157	-1.21729	0.16538	0.372913	1	1267	tags=24%, list=11%, signal=27%
PRC2_SUZ12_UP.V1_DN	70	-0.477002	-1.21579	0.189931	0.371301	1	2241	tags=34%, list=20%, signal=43%
RB_P107_DN.V1_UP	105	-0.458529	-1.21309	0.155747	0.373183	1	2290	tags=30%, list=21%, signal=37%
P53_DN.V1_UP	118	-0.453383	-1.21183	0.144681	0.370888	1	985	tags=21%, list=9%, signal=23%
BMI1_DN.V1_DN	85	-0.46534	-1.19919	0.186667	0.398174	1	901	tags=20%, list=8%, signal=22%
ESC_J1_UP_LATE.V1_DN	130	-0.448074	-1.19685	0.166316	0.39896	1	1729	tags=22%, list=16%, signal=26%
MTOR_UP.V1_DN	104	-0.452383	-1.1966	0.176471	0.394489	1	966	tags=13%, list=9%, signal=14%
KRAS.600_UP.V1_UP	105	-0.457009	-1.19435	0.165059	0.395186	1	827	tags=21%, list=7%, signal=22%
NRL_DN.V1_DN	82	-0.460906	-1.19324	0.19163	0.392723	1	1176	tags=16%, list=11%, signal=18%
RPS14_DN.V1_DN	140	-0.444074	-1.18963	0.16841	0.397089	1	3129	tags=41%, list=28%, signal=56%
KRAS.BREAST_UP.V1_DN	47	-0.491294	-1.18897	0.223171	0.393788	1	1735	tags=36%, list=16%, signal=43%
PTEN_DN.V1_UP	60	-0.477236	-1.18727	0.23865	0.39354	1	1560	tags=35%, list=14%, signal=41%
JNK_DN.V1_DN	92	-0.453455	-1.18473	0.201093	0.395192	1	1447	tags=26%, list=13%, signal=30%
IL15_UP.V1_DN	59	-0.477259	-1.18133	0.236633	0.398285	1	1384	tags=31%, list=12%, signal=35%
CYCLIN_D1_KE_.V1_DN	85	-0.452975	-1.17216	0.208939	0.415865	1	772	tags=11%, list=7%, signal=11%
ATF2_S_UP.V1_DN	81	-0.450868	-1.16878	0.232584	0.420058	1	1870	tags=28%, list=17%, signal=34%
PRC2_SUZ12_UP.V1_UP	73	-0.458445	-1.16448	0.247706	0.425786	1	1783	tags=21%, list=16%, signal=24%
MEK_UP.V1_DN	130	-0.432328	-1.16211	0.220588	0.426213	1	792	tags=13%, list=7%, signal=14%
CTIP_DN.V1_DN	50	-0.477399	-1.16173	0.262295	0.422526	1	1334	tags=28%, list=12%, signal=32%
CAMP_UP.V1_DN	150	-0.428725	-1.1578	0.191161	0.427545	1	1122	tags=15%, list=10%, signal=16%
CSR_LATE_UP.V1_UP	135	-0.433764	-1.15692	0.203319	0.425142	1	3311	tags=40%, list=30%, signal=56%
KRAS.PROSTATE_UP.V1_UP	39	-0.49483	-1.1492	0.269231	0.438916	1	2236	tags=38%, list=20%, signal=48%
EGFR_UP.V1_DN	141	-0.421704	-1.14103	0.242138	0.454852	1	1080	tags=16%, list=10%, signal=18%
SRC_UP.V1_UP	62	-0.450405	-1.13163	0.288813	0.474168	1	1805	tags=26%, list=16%, signal=31%
MTOR_UP.N4.V1_UP	157	-0.415578	-1.11627	0.25445	0.508663	1	2231	tags=27%, list=20%, signal=34%
RAF_UP.V1_UP	139	-0.412309	-1.1121	0.281543	0.514147	1	1129	tags=18%, list=10%, signal=20%
LEF1_UP.V1_UP	95	-0.426707	-1.11118	0.299781	0.511316	1	1141	tags=24%, list=10%, signal=27%
AKT_UP.V1_UP	95	-0.421482	-1.10952	0.306609	0.510503	1	908	tags=18%, list=8%, signal=19%
RB_DN.V1_DN	89	-0.426286	-1.10404	0.313531	0.519609	1	1416	tags=19%, list=13%, signal=22%
IL2_UP.V1_DN	83	-0.427974	-1.10385	0.312639	0.514773	1	1735	tags=30%, list=16%, signal=35%
BCAT_GDS748_UP	32	-0.480164	-1.10294	0.350503	0.511854	1	574	tags=19%, list=5%, signal=20%
KRAS.DF.V1_DN	95	-0.423088	-1.09238	0.330454	0.53416	1	861	tags=14%, list=8%, signal=15%
ESC_J1_UP_LATE.V1_UP	99	-0.414341	-1.08355	0.352877	0.550952	1	904	tags=19%, list=8%, signal=21%
BCAT.100_UP.V1_UP	21	-0.504812	-1.08013	0.389189	0.55451	1	1330	tags=38%, list=12%, signal=43%
WNT_UP.V1_DN	78	-0.419489	-1.0784	0.35553	0.553279	1	966	tags=15%, list=9%, signal=17%
BCAT.100_UP.V1_DN	18	-0.504991	-1.07377	0.394737	0.559286	1	501	tags=11%, list=5%, signal=12%
PDGF_ERK_DN.V1_UP	95	-0.405606	-1.07151	0.377031	0.559712	1	1472	tags=17%, list=13%, signal=19%
PRC1_BMI_UP.V1_UP	58	-0.424116	-1.0634	0.391559	0.574501	1	1820	tags=26%, list=16%, signal=31%
E2F1_UP.V1_DN	117	-0.401395	-1.05992	0.38226	0.577848	1	1940	tags=26%, list=18%, signal=32%
IL21_UP.V1_UP	64	-0.430312	-1.05915	0.400231	0.574434	1	1787	tags=27%, list=16%, signal=31%
IL2_UP.V1_UP	92	-0.406698	-1.05255	0.384193	0.585335	1	1039	tags=22%, list=9%, signal=24%
ERB2_UP.V1_UP	112	-0.395163	-1.05249	0.405751	0.580228	1	1219	tags=21%, list=11%, signal=24%
NOTCH_DN.V1_UP	72	-0.415351	-1.04807	0.425864	0.585596	1	914	tags=15%, list=8%, signal=17%
BCAT_BILD_ET_AL_UP	29	-0.464388	-1.045	0.415094	0.587847	1	770	tags=14%, list=7%, signal=15%
PRC1_BMI_UP.V1_DN	66	-0.414259	-1.04333	0.408827	0.586641	1	1798	tags=26%, list=16%, signal=31%
SIRNA_EIF4GI_DN	71	-0.411977	-1.03958	0.416854	0.590507	1	2357	tags=23%, list=21%, signal=28%
JAK2_DN.V1_UP	55	-0.421051	-1.03948	0.429245	0.585633	1	2309	tags=42%, list=21%, signal=53%
ESC_V6.5_UP_LATE.V1_UP	122	-0.389385	-1.03626	0.417815	0.588	1	2097	tags=30%, list=19%, signal=36%
ERB2_UP.V1_DN	155	-0.377918	-1.02785	0.437175	0.602836	1	574	tags=6%, list=5%, signal=7%
DCA_UP.V1_DN	103	-0.389196	-1.02584	0.447905	0.602227	1	1883	tags=24%, list=17%, signal=29%
STK33_NOMO_UP	176	-0.37635	-1.02537	0.437821	0.598209	1	1206	tags=16%, list=11%, signal=18%
ESC_V6.5_UP_LATE.V1_DN	110	-0.380513	-1.00282	0.490281	0.64579	1	1729	tags=27%, list=16%, signal=32%
CYCLIN_D1_UP.V1_UP	98	-0.379807	-0.996281	0.494067	0.655916	1	1728	tags=26%, list=16%, signal=30%
KRAS.LUNG.BREAST_UP.V1_UP	37	-0.414862	-0.977808	0.52534	0.692337	1	1285	tags=27%, list=12%, signal=30%
CAHOY_ASTROCYTIC	58	-0.389775	-0.973404	0.532089	0.696773	1	1634	tags=22%, list=15%, signal=26%
KRAS.LUNG_UP.V1_DN	30	-0.425318	-0.970397	0.531407	0.697526	1	1495	tags=27%, list=13%, signal=31%
ESC_V6.5_UP_EARLY.V1_UP	92	-0.377608	-0.969601	0.541037	0.693801	1	2125	tags=27%, list=19%, signal=33%
SRC_UP.V1_DN	92	-0.372103	-0.966511	0.5747	0.6952	1	1811	tags=25%, list=16%, signal=30%
KRAS.300_UP.V1_UP	54	-0.387247	-0.963164	0.529755	0.696928	1	1301	tags=26%, list=12%, signal=29%
KRAS.PROSTATE_UP.V1_DN	34	-0.412934	-0.96275	0.542044	0.692478	1	845	tags=24%, list=8%, signal=25%
AKT_UP_MTOR_DN.V1_UP	100	-0.365497	-0.96216	0.555799	0.688223	1	996	tags=16%, list=9%, signal=17%
RB_P107_DN.V1_DN	101	-0.366192	-0.957206	0.568306	0.693512	1	1608	tags=17%, list=15%, signal=20%
RAPA_EARLY_UP.V1_DN	107	-0.357347	-0.941319	0.582974	0.720733	1	1976	tags=22%, list=18%, signal=27%
KRAS.AMP.LUNG_UP.V1_DN	43	-0.391935	-0.9398	0.558473	0.718267	1	1639	tags=28%, list=15%, signal=33%
NOTCH_DN.V1_DN	59	-0.375156	-0.939146	0.581692	0.714061	1	967	tags=17%, list=9%, signal=18%
CRX_DN.V1_UP	63	-0.371874	-0.935879	0.585731	0.715485	1	1437	tags=21%, list=13%, signal=24%
PTEN_DN.V2_UP	56	-0.369817	-0.915254	0.609447	0.750798	1	1586	tags=29%, list=14%, signal=33%
GCNP_SHH_UP_EARLY.V1_DN	91	-0.348832	-0.908883	0.650496	0.757288	1	718	tags=12%, list=6%, signal=13%
CORDENONSI_YAP_CONSERVED_SIGNATURE	43	-0.374594	-0.89763	0.635802	0.772301	1	503	tags=14%, list=5%, signal=15%
TBK1.DF_UP	222	-0.317405	-0.876656	0.766431	0.805189	1	1704	tags=17%, list=15%, signal=20%
CYCLIN_D1_KE_.V1_UP	126	-0.323176	-0.865819	0.751317	0.818489	1	2359	tags=23%, list=21%, signal=29%
CAHOY_OLIGODENDROCUTIC	56	-0.34967	-0.863597	0.692132	0.816601	1	1700	tags=32%, list=15%, signal=38%
GCNP_SHH_UP_LATE.V1_UP	141	-0.316403	-0.854796	0.769874	0.826022	1	2770	tags=26%, list=25%, signal=35%
GLI1_UP.V1_DN	18	-0.402815	-0.847633	0.665295	0.832028	1	2264	tags=17%, list=20%, signal=21%
ESC_J1_UP_EARLY.V1_UP	91	-0.321843	-0.837121	0.764576	0.843644	1	2281	tags=30%, list=21%, signal=37%
TBK1.DN.48HRS_UP	43	-0.340669	-0.824732	0.71734	0.857244	1	2842	tags=26%, list=26%, signal=34%
PRC2_EDD_UP.V1_UP	134	-0.304878	-0.819883	0.81741	0.858742	1	3226	tags=38%, list=29%, signal=53%
MTOR_UP.V1_UP	98	-0.312126	-0.811657	0.806904	0.865027	1	754	tags=10%, list=7%, signal=11%
EIF4E_UP	66	-0.316497	-0.801771	0.792986	0.873513	1	1901	tags=23%, list=17%, signal=27%
CAMP_UP.V1_UP	159	-0.290055	-0.794653	0.859521	0.877244	1	2185	tags=17%, list=20%, signal=21%
CSR_EARLY_UP.V1_DN	99	-0.295294	-0.784074	0.841758	0.885975	1	1490	tags=18%, list=13%, signal=21%
ESC_J1_UP_EARLY.V1_DN	109	-0.298935	-0.783575	0.855905	0.880684	1	1675	tags=19%, list=15%, signal=22%
CYCLIN_D1_UP.V1_DN	108	-0.295977	-0.77476	0.861259	0.886258	1	864	tags=10%, list=8%, signal=11%
TBK1.DN.48HRS_DN	43	-0.319578	-0.766538	0.799757	0.890543	1	3087	tags=30%, list=28%, signal=42%
ATM_DN.V1_UP	37	-0.32393	-0.754026	0.80454	0.899963	1	3169	tags=46%, list=29%, signal=64%
RB_P130_DN.V1_DN	101	-0.282659	-0.744176	0.894451	0.905499	1	666	tags=6%, list=6%, signal=6%
CSR_EARLY_UP.V1_UP	130	-0.254131	-0.679138	0.95163	0.96018	1	1200	tags=12%, list=11%, signal=13%
E2F1_UP.V1_UP	159	-0.245138	-0.662896	0.979123	0.966136	1	1259	tags=8%, list=11%, signal=9%
TBK1.DF_DN	249	-0.235091	-0.648819	0.991919	0.969397	1	1464	tags=10%, list=13%, signal=11%
VEGF_A_UP.V1_DN	159	-0.240801	-0.64851	0.978261	0.963465	1	2179	tags=15%, list=20%, signal=19%
GCNP_SHH_UP_EARLY.V1_UP	127	-0.183298	-0.487013	1	0.997793	1	2634	tags=19%, list=24%, signal=25%

## Sheet: OTX015_up
NAME	SIZE	ES	NES	NOM p-val	FDR q-val	FWER p-val	RANK AT MAX	LEADING EDGE
STK33_SKM_UP	166	0.513722	1.94613	0	0.00131579	0.001	943	tags=31%, list=9%, signal=33%
MTOR_UP.N4.V1_DN	129	0.484832	1.81497	0	0.00957905	0.015	1393	tags=33%, list=13%, signal=37%
STK33_UP	174	0.404372	1.58553	0	0.0815647	0.175	1096	tags=27%, list=10%, signal=30%
HOXA9_DN.V1_UP	120	0.381972	1.41916	0	0.22604	0.509	1511	tags=28%, list=14%, signal=32%
KRAS.50_UP.V1_UP	23	0.519164	1.41691	0.0393013	0.183219	0.514	956	tags=30%, list=9%, signal=33%
PRC2_EDD_UP.V1_DN	90	0.391897	1.35595	0.0104167	0.235134	0.672	610	tags=17%, list=6%, signal=17%
E2F3_UP.V1_DN	56	0.417448	1.34341	0.0534351	0.219809	0.708	1762	tags=34%, list=16%, signal=40%
TGFB_UP.V1_UP	110	0.367914	1.32533	0.0384615	0.217436	0.754	1070	tags=23%, list=10%, signal=25%
TGFB_UP.V1_DN	116	0.356698	1.30833	0.0357143	0.217572	0.789	959	tags=20%, list=9%, signal=21%
PIGF_UP.V1_UP	155	0.326655	1.26878	0	0.246127	0.851	2416	tags=26%, list=22%, signal=33%
IL15_UP.V1_UP	94	0.350465	1.23394	0.0632911	0.273775	0.909	592	tags=18%, list=5%, signal=19%
PDGF_ERK_DN.V1_DN	121	0.338101	1.22967	0.05	0.257006	0.915	1026	tags=17%, list=9%, signal=19%
RELA_DN.V1_UP	64	0.362876	1.22254	0.124088	0.24767	0.924	675	tags=14%, list=6%, signal=15%
BCAT_BILD_ET_AL_DN	41	0.399121	1.21205	0.139535	0.245981	0.935	1562	tags=32%, list=14%, signal=37%
PTEN_DN.V2_DN	85	0.348271	1.1884	0.126316	0.26492	0.96	317	tags=11%, list=3%, signal=11%
MYC_UP.V1_DN	71	0.344356	1.1742	0.166667	0.269955	0.968	864	tags=21%, list=8%, signal=23%
YAP1_DN	21	0.442424	1.15862	0.276151	0.278161	0.976	1666	tags=33%, list=15%, signal=39%
KRAS.LUNG_UP.V1_UP	34	0.372908	1.09963	0.311005	0.366784	0.998	187	tags=15%, list=2%, signal=15%
ATM_DN.V1_DN	41	0.35964	1.09697	0.312139	0.351585	0.998	757	tags=20%, list=7%, signal=21%
JAK2_DN.V1_DN	85	0.288464	1.03769	0.384615	0.462464	1	2013	tags=35%, list=18%, signal=43%
PDGF_UP.V1_UP	119	0.285946	1.02646	0.344262	0.466102	1	1238	tags=14%, list=11%, signal=16%
PDGF_UP.V1_DN	46	0.289276	0.889076	0.6875	0.799096	1	2031	tags=39%, list=18%, signal=48%
RB_DN.V1_UP	96	0.23622	0.837902	0.833333	0.869733	1	952	tags=11%, list=9%, signal=12%
BCAT_GDS748_DN	37	0.277744	0.821955	0.739583	0.86105	1	1731	tags=27%, list=16%, signal=32%
SIRNA_EIF4GI_UP	78	0.182867	0.627503	1	0.983686	1	1499	tags=13%, list=14%, signal=15%

## Sheet: JQ1_dn
NAME	SIZE	ES	NES	NOM p-val	FDR q-val	FWER p-val	RANK AT MAX	LEADING EDGE
ALK_DN.V1_DN	41	-0.70226	-1.78993	0	0.0183688	0.019	882	tags=34%, list=8%, signal=37%
KRAS.KIDNEY_UP.V1_DN	24	-0.723145	-1.66843	0.00584795	0.100563	0.188	684	tags=29%, list=6%, signal=31%
ESC_V6.5_UP_EARLY.V1_DN	87	-0.580898	-1.6555	0.00123305	0.0828277	0.23	983	tags=26%, list=9%, signal=29%
KRAS.600.LUNG.BREAST_UP.V1_DN	84	-0.592624	-1.65321	0	0.0635192	0.236	1480	tags=36%, list=13%, signal=41%
CTIP_DN.V1_UP	25	-0.716981	-1.65134	0.00906344	0.0519597	0.24	1348	tags=48%, list=12%, signal=55%
MYC_UP.V1_UP	138	-0.553354	-1.64293	0	0.0495825	0.27	2537	tags=49%, list=23%, signal=62%
PKCA_DN.V1_UP	60	-0.602906	-1.62662	0.00395778	0.0555941	0.334	1431	tags=32%, list=13%, signal=36%
GCNP_SHH_UP_LATE.V1_DN	108	-0.544033	-1.58649	0.00614251	0.08479	0.508	1212	tags=25%, list=11%, signal=28%
STK33_SKM_DN	155	-0.5216	-1.58145	0	0.0799121	0.528	1281	tags=28%, list=12%, signal=31%
MEL18_DN.V1_UP	65	-0.572595	-1.56892	0.00962861	0.0840415	0.574	1139	tags=32%, list=10%, signal=36%
ATF2_S_UP.V1_UP	81	-0.559106	-1.56086	0.00623441	0.0850929	0.615	1247	tags=28%, list=11%, signal=32%
PTEN_DN.V1_DN	47	-0.596006	-1.55918	0.0151515	0.0796406	0.627	985	tags=26%, list=9%, signal=28%
KRAS.600.LUNG.BREAST_UP.V1_UP	76	-0.557314	-1.54862	0.0091623	0.0843995	0.68	1686	tags=34%, list=15%, signal=40%
ALK_DN.V1_UP	48	-0.595679	-1.54625	0.0152144	0.0806625	0.695	1197	tags=23%, list=11%, signal=26%
ATF2_UP.V1_UP	76	-0.557544	-1.5274	0.00670241	0.0956942	0.773	1388	tags=18%, list=13%, signal=21%
CSR_LATE_UP.V1_DN	99	-0.526571	-1.52436	0.00616523	0.0932414	0.789	1056	tags=21%, list=10%, signal=23%
RPS14_DN.V1_UP	66	-0.555782	-1.51678	0.0118577	0.0963071	0.81	1160	tags=32%, list=10%, signal=35%
RELA_DN.V1_DN	32	-0.629786	-1.51484	0.0131579	0.0930443	0.822	617	tags=25%, list=6%, signal=26%
ATF2_UP.V1_DN	90	-0.519082	-1.47013	0.0238095	0.144902	0.946	929	tags=19%, list=8%, signal=20%
KRAS.AMP.LUNG_UP.V1_UP	26	-0.630733	-1.46989	0.0467572	0.138048	0.948	1754	tags=42%, list=16%, signal=50%
AKT_UP_MTOR_DN.V1_DN	117	-0.49941	-1.46226	0.00603136	0.142165	0.958	1604	tags=29%, list=14%, signal=34%
STK33_DN	183	-0.474013	-1.45477	0.00566893	0.145958	0.967	1266	tags=24%, list=11%, signal=27%
DCA_UP.V1_UP	71	-0.529886	-1.4522	0.0273438	0.143333	0.969	1174	tags=21%, list=11%, signal=23%
BMI1_DN_MEL18_DN.V1_DN	80	-0.520496	-1.44362	0.0312907	0.148826	0.977	1467	tags=39%, list=13%, signal=44%
BRCA1_DN.V1_UP	33	-0.585047	-1.43835	0.0536513	0.150283	0.98	464	tags=21%, list=4%, signal=22%
HOXA9_DN.V1_DN	139	-0.482743	-1.43606	0.0164319	0.148272	0.981	1594	tags=22%, list=14%, signal=26%
NFE2L2.V2	203	-0.458353	-1.42627	0.0102389	0.157885	0.991	1347	tags=20%, list=12%, signal=22%
PKCA_DN.V1_DN	79	-0.507073	-1.41664	0.0352941	0.167577	0.994	761	tags=18%, list=7%, signal=19%
STK33_NOMO_DN	166	-0.46126	-1.409	0.0166271	0.173118	0.995	1276	tags=25%, list=12%, signal=28%
AKT_UP.V1_DN	109	-0.484408	-1.39766	0.031401	0.187616	0.999	1071	tags=22%, list=10%, signal=24%
CAHOY_NEURONAL	35	-0.571848	-1.39344	0.0657895	0.188637	0.999	1430	tags=37%, list=13%, signal=43%
BRCA1_DN.V1_DN	60	-0.513684	-1.39027	0.0497981	0.188029	0.999	1818	tags=30%, list=16%, signal=36%
KRAS.DF.V1_UP	134	-0.458361	-1.37773	0.0316901	0.203827	1	1513	tags=21%, list=14%, signal=24%
WNT_UP.V1_UP	74	-0.492977	-1.35698	0.064433	0.236259	1	1363	tags=24%, list=12%, signal=28%
P53_DN.V1_DN	111	-0.464539	-1.3508	0.0534161	0.24169	1	1419	tags=27%, list=13%, signal=31%
BCAT_BILD_ET_AL_UP	29	-0.55814	-1.34805	0.0989505	0.240729	1	280	tags=14%, list=3%, signal=14%
PRC2_EZH2_UP.V1_DN	97	-0.465277	-1.34176	0.0499376	0.245918	1	1167	tags=22%, list=11%, signal=24%
ESC_J1_UP_LATE.V1_DN	130	-0.447999	-1.33554	0.0556872	0.251485	1	1763	tags=25%, list=16%, signal=30%
KRAS.BREAST_UP.V1_UP	28	-0.553404	-1.32014	0.12708	0.277134	1	1873	tags=39%, list=17%, signal=47%
BMI1_DN.V1_DN	85	-0.461544	-1.31742	0.0627353	0.276421	1	1056	tags=24%, list=10%, signal=26%
MTOR_UP.V1_DN	104	-0.452001	-1.31169	0.0794451	0.281509	1	1002	tags=14%, list=9%, signal=16%
BMI1_DN.V1_UP	64	-0.484584	-1.30811	0.0954301	0.283483	1	969	tags=27%, list=9%, signal=29%
P53_DN.V2_UP	37	-0.516601	-1.30431	0.123547	0.28483	1	1476	tags=35%, list=13%, signal=40%
RAF_UP.V1_DN	136	-0.435072	-1.29909	0.0570071	0.289894	1	1021	tags=18%, list=9%, signal=19%
PIGF_UP.V1_DN	81	-0.454897	-1.27722	0.110406	0.333022	1	1818	tags=25%, list=16%, signal=29%
NRL_DN.V1_UP	78	-0.453251	-1.27312	0.105263	0.335716	1	709	tags=14%, list=6%, signal=15%
RB_P130_DN.V1_UP	73	-0.456615	-1.27115	0.128105	0.333122	1	1141	tags=18%, list=10%, signal=20%
P53_DN.V2_DN	69	-0.463348	-1.26586	0.13577	0.338943	1	1141	tags=22%, list=10%, signal=24%
RB_P107_DN.V1_UP	105	-0.43613	-1.2559	0.0946451	0.356076	1	1256	tags=16%, list=11%, signal=18%
KRAS.LUNG.BREAST_UP.V1_DN	42	-0.502172	-1.25119	0.173315	0.36084	1	672	tags=19%, list=6%, signal=20%
CRX_NRL_DN.V1_DN	83	-0.444723	-1.2508	0.126316	0.354733	1	1526	tags=25%, list=14%, signal=29%
SNF5_DN.V1_UP	92	-0.439569	-1.24933	0.132391	0.351535	1	1941	tags=29%, list=18%, signal=35%
CRX_DN.V1_DN	76	-0.453258	-1.24792	0.109974	0.348069	1	965	tags=21%, list=9%, signal=23%
CRX_NRL_DN.V1_UP	73	-0.451383	-1.23826	0.143979	0.363768	1	1326	tags=23%, list=12%, signal=26%
KRAS.KIDNEY_UP.V1_UP	79	-0.438451	-1.23627	0.156838	0.361946	1	672	tags=20%, list=6%, signal=21%
KRAS.LUNG.BREAST_UP.V1_UP	37	-0.491579	-1.22953	0.204644	0.371346	1	1584	tags=32%, list=14%, signal=38%
KRAS.600_UP.V1_DN	71	-0.447857	-1.2271	0.153639	0.371075	1	1401	tags=27%, list=13%, signal=30%
CAHOY_ASTROGLIAL	41	-0.482633	-1.22686	0.167347	0.365161	1	1083	tags=29%, list=10%, signal=32%
EGFR_UP.V1_DN	141	-0.406899	-1.22652	0.132701	0.359937	1	1075	tags=17%, list=10%, signal=19%
RAPA_EARLY_UP.V1_UP	88	-0.429116	-1.22538	0.141722	0.356686	1	1113	tags=16%, list=10%, signal=18%
MTOR_UP.N4.V1_UP	157	-0.402885	-1.21954	0.127934	0.363783	1	2187	tags=31%, list=20%, signal=38%
KRAS.300_UP.V1_DN	31	-0.503103	-1.21324	0.210604	0.372345	1	684	tags=23%, list=6%, signal=24%
KRAS.600_UP.V1_UP	105	-0.418058	-1.21078	0.147879	0.372424	1	1410	tags=26%, list=13%, signal=29%
CTIP_DN.V1_DN	50	-0.465458	-1.20929	0.205722	0.369741	1	743	tags=22%, list=7%, signal=23%
CYCLIN_D1_UP.V1_UP	98	-0.422136	-1.20823	0.158428	0.366587	1	2253	tags=31%, list=20%, signal=38%
LTE2_UP.V1_DN	134	-0.405505	-1.20406	0.148456	0.3704	1	1097	tags=18%, list=10%, signal=20%
NRL_DN.V1_DN	82	-0.422158	-1.19449	0.197943	0.386765	1	2354	tags=34%, list=21%, signal=43%
MEK_UP.V1_DN	130	-0.406885	-1.18896	0.162819	0.393326	1	1130	tags=14%, list=10%, signal=15%
ERB2_UP.V1_DN	155	-0.390414	-1.18655	0.149343	0.392966	1	1420	tags=12%, list=13%, signal=14%
PRC2_EZH2_UP.V1_UP	126	-0.400652	-1.1809	0.173594	0.400718	1	2351	tags=29%, list=21%, signal=36%
BMI1_DN_MEL18_DN.V1_UP	68	-0.429133	-1.17871	0.223684	0.400355	1	973	tags=25%, list=9%, signal=27%
ATF2_S_UP.V1_DN	81	-0.423849	-1.17848	0.214748	0.39543	1	1180	tags=22%, list=11%, signal=25%
JNK_DN.V1_DN	92	-0.406398	-1.17697	0.177461	0.393146	1	1098	tags=16%, list=10%, signal=18%
YAP1_UP	33	-0.481176	-1.16483	0.281859	0.414513	1	1677	tags=21%, list=15%, signal=25%
SRC_UP.V1_UP	62	-0.428274	-1.16428	0.236148	0.410532	1	1246	tags=19%, list=11%, signal=22%
MEK_UP.V1_UP	125	-0.398776	-1.15963	0.218225	0.415729	1	1278	tags=24%, list=12%, signal=27%
SIRNA_EIF4GI_DN	71	-0.4213	-1.15926	0.245707	0.411185	1	2296	tags=30%, list=21%, signal=37%
KRAS.DF.V1_DN	95	-0.406574	-1.15643	0.231061	0.411879	1	752	tags=12%, list=7%, signal=12%
MEL18_DN.V1_DN	82	-0.409288	-1.1559	0.246753	0.407999	1	1435	tags=30%, list=13%, signal=35%
LEF1_UP.V1_DN	102	-0.402794	-1.15126	0.240196	0.412804	1	1302	tags=25%, list=12%, signal=28%
PDGF_ERK_DN.V1_UP	95	-0.396146	-1.14192	0.240202	0.428998	1	1363	tags=20%, list=12%, signal=23%
RPS14_DN.V1_DN	140	-0.380065	-1.13092	0.241505	0.449413	1	2347	tags=30%, list=21%, signal=38%
BCAT.100_UP.V1_DN	18	-0.515789	-1.12203	0.319871	0.465104	1	527	tags=11%, list=5%, signal=12%
RB_DN.V1_DN	89	-0.39322	-1.12027	0.287898	0.463236	1	886	tags=12%, list=8%, signal=13%
CAHOY_OLIGODENDROCUTIC	56	-0.420428	-1.11509	0.288948	0.469233	1	1321	tags=29%, list=12%, signal=32%
IL2_UP.V1_UP	92	-0.38622	-1.11297	0.296389	0.46851	1	943	tags=21%, list=9%, signal=22%
SRC_UP.V1_DN	92	-0.384218	-1.10983	0.294856	0.470525	1	1419	tags=22%, list=13%, signal=25%
PRC2_SUZ12_UP.V1_DN	70	-0.404484	-1.10928	0.288564	0.46654	1	1190	tags=19%, list=11%, signal=21%
KRAS.LUNG_UP.V1_DN	30	-0.462372	-1.10546	0.318841	0.470295	1	739	tags=23%, list=7%, signal=25%
PRC2_SUZ12_UP.V1_UP	73	-0.398395	-1.10395	0.305304	0.468613	1	1652	tags=19%, list=15%, signal=22%
CYCLIN_D1_KE_.V1_DN	85	-0.391027	-1.10156	0.298851	0.468573	1	973	tags=13%, list=9%, signal=14%
GLI1_UP.V1_DN	18	-0.488539	-1.0797	0.390895	0.51472	1	3117	tags=39%, list=28%, signal=54%
E2F3_UP.V1_UP	132	-0.358731	-1.07826	0.321687	0.5123	1	1430	tags=27%, list=13%, signal=30%
ATM_DN.V1_DN	41	-0.412521	-1.0574	0.37106	0.556168	1	624	tags=17%, list=6%, signal=18%
PTEN_DN.V2_UP	56	-0.393615	-1.05072	0.374159	0.56598	1	1169	tags=21%, list=11%, signal=24%
KRAS.BREAST_UP.V1_DN	47	-0.401083	-1.0463	0.394245	0.570561	1	1240	tags=26%, list=11%, signal=29%
ESC_V6.5_UP_LATE.V1_DN	110	-0.357699	-1.04225	0.40122	0.574463	1	1974	tags=32%, list=18%, signal=38%
JNK_DN.V1_UP	78	-0.370559	-1.03653	0.401617	0.581453	1	1172	tags=19%, list=11%, signal=21%
MTOR_UP.V1_UP	98	-0.361303	-1.03599	0.387531	0.576744	1	1231	tags=14%, list=11%, signal=16%
IL2_UP.V1_DN	83	-0.36948	-1.03583	0.409032	0.571342	1	1480	tags=27%, list=13%, signal=30%
JAK2_DN.V1_UP	55	-0.386952	-1.03263	0.428177	0.572736	1	2233	tags=44%, list=20%, signal=54%
IL21_UP.V1_DN	59	-0.377047	-1.02675	0.415882	0.580271	1	1275	tags=25%, list=12%, signal=29%
VEGF_A_UP.V1_UP	82	-0.365584	-1.02639	0.437262	0.575478	1	899	tags=16%, list=8%, signal=17%
P53_DN.V1_UP	118	-0.349644	-1.02462	0.429274	0.573841	1	1281	tags=19%, list=12%, signal=22%
CAMP_UP.V1_DN	150	-0.331379	-0.995729	0.490058	0.634164	1	1436	tags=15%, list=13%, signal=17%
WNT_UP.V1_DN	78	-0.359143	-0.992426	0.48072	0.635472	1	892	tags=12%, list=8%, signal=12%
CORDENONSI_YAP_CONSERVED_SIGNATURE	43	-0.385854	-0.991917	0.474648	0.630768	1	416	tags=12%, list=4%, signal=12%
LTE2_UP.V1_UP	138	-0.33147	-0.988973	0.491686	0.631154	1	1131	tags=14%, list=10%, signal=16%
DCA_UP.V1_DN	103	-0.34127	-0.986767	0.498141	0.630413	1	1541	tags=22%, list=14%, signal=26%
TBK1.DN.48HRS_UP	43	-0.3895	-0.980977	0.490141	0.637347	1	2770	tags=37%, list=25%, signal=49%
CYCLIN_D1_KE_.V1_UP	126	-0.332311	-0.975761	0.519656	0.643158	1	982	tags=11%, list=9%, signal=12%
IL15_UP.V1_DN	59	-0.361302	-0.972751	0.526676	0.643645	1	1131	tags=24%, list=10%, signal=26%
E2F1_UP.V1_DN	117	-0.332336	-0.972257	0.499397	0.639138	1	1086	tags=17%, list=10%, signal=19%
CSR_LATE_UP.V1_UP	135	-0.328637	-0.971501	0.538915	0.63507	1	2967	tags=34%, list=27%, signal=46%
KRAS.300_UP.V1_UP	54	-0.366209	-0.971094	0.517615	0.630391	1	1160	tags=22%, list=10%, signal=25%
EIF4E_DN	75	-0.351441	-0.966828	0.537649	0.634004	1	1647	tags=16%, list=15%, signal=19%
PRC1_BMI_UP.V1_DN	66	-0.350429	-0.95866	0.548512	0.645876	1	1743	tags=24%, list=16%, signal=29%
RAF_UP.V1_UP	139	-0.315402	-0.95776	0.548951	0.641978	1	765	tags=12%, list=7%, signal=13%
BCAT_GDS748_UP	32	-0.39634	-0.956021	0.532641	0.640259	1	1343	tags=25%, list=12%, signal=28%
EGFR_UP.V1_UP	123	-0.322125	-0.951742	0.581423	0.643832	1	1236	tags=18%, list=11%, signal=20%
IL21_UP.V1_UP	64	-0.352565	-0.943469	0.571984	0.655425	1	1660	tags=25%, list=15%, signal=29%
CYCLIN_D1_UP.V1_DN	108	-0.321383	-0.938893	0.593556	0.659344	1	1197	tags=12%, list=11%, signal=13%
PTEN_DN.V1_UP	60	-0.345883	-0.927834	0.567423	0.676739	1	1373	tags=25%, list=12%, signal=28%
PRC2_EDD_UP.V1_UP	134	-0.304249	-0.911245	0.641598	0.704302	1	1879	tags=19%, list=17%, signal=22%
LEF1_UP.V1_UP	95	-0.315395	-0.900239	0.658924	0.720595	1	1436	tags=20%, list=13%, signal=23%
CRX_DN.V1_UP	63	-0.320328	-0.866011	0.684814	0.781258	1	727	tags=13%, list=7%, signal=14%
GCNP_SHH_UP_LATE.V1_UP	141	-0.289502	-0.86371	0.757467	0.779193	1	2489	tags=25%, list=22%, signal=32%
RELA_DN.V1_UP	64	-0.315449	-0.863596	0.697248	0.773318	1	788	tags=11%, list=7%, signal=12%
RAPA_EARLY_UP.V1_DN	107	-0.293867	-0.858362	0.758323	0.77717	1	1637	tags=19%, list=15%, signal=22%
SNF5_DN.V1_DN	74	-0.307065	-0.85261	0.698413	0.781699	1	1254	tags=20%, list=11%, signal=23%
PRC1_BMI_UP.V1_UP	58	-0.31476	-0.842493	0.681818	0.793721	1	1818	tags=26%, list=16%, signal=31%
EIF4E_UP	66	-0.294924	-0.801113	0.79617	0.858118	1	1948	tags=27%, list=18%, signal=33%
ESC_V6.5_UP_LATE.V1_UP	122	-0.269305	-0.792685	0.869305	0.865205	1	1589	tags=20%, list=14%, signal=23%
ESC_V6.5_UP_EARLY.V1_UP	92	-0.275118	-0.785003	0.857855	0.870379	1	1208	tags=13%, list=11%, signal=15%
TBK1.DN.48HRS_DN	43	-0.303501	-0.772783	0.824363	0.88253	1	398	tags=7%, list=4%, signal=7%
RB_DN.V1_UP	96	-0.257601	-0.731771	0.911692	0.927179	1	1843	tags=20%, list=17%, signal=24%
TBK1.DF_DN	249	-0.211508	-0.662794	0.994505	0.978266	1	1265	tags=8%, list=11%, signal=9%
CAMP_UP.V1_UP	159	-0.216441	-0.655744	0.995354	0.975087	1	3343	tags=31%, list=30%, signal=44%
GCNP_SHH_UP_EARLY.V1_UP	127	-0.185426	-0.542456	0.998776	0.995885	1	2184	tags=16%, list=20%, signal=19%

## Sheet: JQ1_up
NAME	SIZE	ES	NES	NOM p-val	FDR q-val	FWER p-val	RANK AT MAX	LEADING EDGE
STK33_SKM_UP	166	0.514669	1.94028	0	0.00715182	0.006	1738	tags=40%, list=16%, signal=47%
MTOR_UP.N4.V1_DN	129	0.489919	1.7706	0	0.0255938	0.044	1092	tags=27%, list=10%, signal=30%
PRC2_EDD_UP.V1_DN	90	0.482094	1.62343	0.0136364	0.0825458	0.201	1301	tags=28%, list=12%, signal=31%
STK33_UP	174	0.425352	1.56772	0	0.110263	0.324	1076	tags=26%, list=10%, signal=29%
TGFB_UP.V1_DN	116	0.438788	1.53378	0.0181818	0.115386	0.408	1282	tags=24%, list=12%, signal=27%
BCAT_GDS748_DN	37	0.529213	1.52411	0.0267559	0.106402	0.439	2575	tags=46%, list=23%, signal=60%
PTEN_DN.V2_DN	85	0.440104	1.50222	0.0147783	0.108768	0.497	1095	tags=20%, list=10%, signal=22%
BCAT_BILD_ET_AL_DN	41	0.494885	1.48468	0.0536913	0.109538	0.553	2169	tags=34%, list=20%, signal=42%
KRAS.50_UP.V1_UP	23	0.537312	1.45201	0.0698925	0.124112	0.639	1586	tags=39%, list=14%, signal=46%
PDGF_ERK_DN.V1_DN	121	0.396973	1.42313	0.0197368	0.142068	0.724	1719	tags=23%, list=16%, signal=27%
HOXA9_DN.V1_UP	120	0.391644	1.42283	0.0138889	0.129362	0.725	1685	tags=29%, list=15%, signal=34%
YAP1_DN	21	0.543436	1.37689	0.100279	0.165015	0.834	1108	tags=24%, list=10%, signal=26%
GCNP_SHH_UP_EARLY.V1_DN	91	0.402007	1.36166	0.0238095	0.170498	0.868	465	tags=13%, list=4%, signal=14%
ERB2_UP.V1_UP	112	0.365882	1.30506	0.0514286	0.238483	0.958	1187	tags=24%, list=11%, signal=27%
BCAT.100_UP.V1_UP	21	0.507057	1.3033	0.129943	0.225678	0.962	575	tags=33%, list=5%, signal=35%
KRAS.AMP.LUNG_UP.V1_DN	43	0.435669	1.2969	0.089701	0.221436	0.964	557	tags=21%, list=5%, signal=22%
ESC_J1_UP_LATE.V1_UP	99	0.372545	1.29409	0.0473684	0.212343	0.966	818	tags=18%, list=7%, signal=19%
TGFB_UP.V1_UP	110	0.367697	1.29136	0.0582011	0.204495	0.968	989	tags=19%, list=9%, signal=21%
AKT_UP_MTOR_DN.V1_UP	100	0.371581	1.28015	0.0597015	0.208568	0.979	1132	tags=26%, list=10%, signal=29%
JAK2_DN.V1_DN	85	0.372993	1.25851	0.0897436	0.228079	0.991	1104	tags=22%, list=10%, signal=25%
E2F3_UP.V1_DN	56	0.391616	1.22705	0.139286	0.266113	0.997	1113	tags=18%, list=10%, signal=20%
STK33_NOMO_UP	176	0.324386	1.22079	0.0148148	0.2655	0.998	1076	tags=24%, list=10%, signal=26%
CSR_EARLY_UP.V1_DN	99	0.348319	1.21718	0.0863636	0.260117	0.998	1584	tags=28%, list=14%, signal=33%
MYC_UP.V1_DN	71	0.36549	1.21228	0.135802	0.256545	0.998	425	tags=14%, list=4%, signal=15%
CAHOY_ASTROCYTIC	58	0.377179	1.19101	0.174242	0.281513	1	731	tags=22%, list=7%, signal=24%
IL15_UP.V1_UP	94	0.339364	1.1879	0.113861	0.276055	1	646	tags=15%, list=6%, signal=16%
ESC_J1_UP_EARLY.V1_DN	109	0.325901	1.16569	0.136126	0.301561	1	1007	tags=15%, list=9%, signal=16%
PDGF_UP.V1_DN	46	0.389905	1.16189	0.24055	0.298197	1	1061	tags=24%, list=10%, signal=26%
SIRNA_EIF4GI_UP	78	0.338538	1.15415	0.200855	0.301596	1	1726	tags=22%, list=16%, signal=26%
AKT_UP.V1_UP	95	0.318615	1.11048	0.226601	0.377218	1	1667	tags=32%, list=15%, signal=37%
ATM_DN.V1_UP	37	0.378497	1.08651	0.32	0.418465	1	636	tags=19%, list=6%, signal=20%
KRAS.PROSTATE_UP.V1_DN	34	0.372573	1.05513	0.403226	0.48407	1	1084	tags=35%, list=10%, signal=39%
TBK1.DF_UP	222	0.269914	1.04574	0.358025	0.492034	1	1556	tags=23%, list=14%, signal=26%
PDGF_UP.V1_UP	119	0.292678	1.04124	0.35	0.488668	1	611	tags=8%, list=6%, signal=9%
NOTCH_DN.V1_UP	72	0.314206	1.03373	0.334728	0.494443	1	756	tags=17%, list=7%, signal=18%
KRAS.LUNG_UP.V1_UP	34	0.364664	1.02643	0.401813	0.49927	1	423	tags=15%, list=4%, signal=15%
NOTCH_DN.V1_DN	59	0.319907	1.02615	0.370833	0.486611	1	741	tags=15%, list=7%, signal=16%
PIGF_UP.V1_UP	155	0.268036	0.994588	0.440678	0.553921	1	2174	tags=21%, list=20%, signal=26%
VEGF_A_UP.V1_DN	159	0.254652	0.948993	0.597222	0.665544	1	568	tags=7%, list=5%, signal=7%
ESC_J1_UP_EARLY.V1_UP	91	0.26732	0.938459	0.620087	0.677372	1	793	tags=14%, list=7%, signal=15%
KRAS.PROSTATE_UP.V1_UP	39	0.303742	0.873358	0.659933	0.831483	1	1716	tags=33%, list=15%, signal=39%
CSR_EARLY_UP.V1_UP	130	0.229685	0.828406	0.920213	0.910039	1	1348	tags=14%, list=12%, signal=16%
RB_P130_DN.V1_DN	101	0.237499	0.824041	0.860104	0.896498	1	2195	tags=23%, list=20%, signal=28%
RB_P107_DN.V1_DN	101	0.232293	0.799397	0.90625	0.915201	1	2127	tags=21%, list=19%, signal=25%
GLI1_UP.V1_UP	18	0.315617	0.769605	0.816265	0.930754	1	2424	tags=28%, list=22%, signal=36%
E2F1_UP.V1_UP	159	0.199766	0.747309	0.985714	0.932317	1	473	tags=4%, list=4%, signal=5%

## Sheet: combined_dn
NAME	SIZE	ES	NES	NOM p-val	FDR q-val	FWER p-val	RANK AT MAX	LEADING EDGE
KRAS.KIDNEY_UP.V1_DN	24	-0.774977	-1.78426	0	0.0108102	0.01	1079	tags=38%, list=10%, signal=41%
ALK_DN.V1_DN	41	-0.698938	-1.73346	0.00255754	0.0243443	0.048	984	tags=34%, list=9%, signal=37%
KRAS.600.LUNG.BREAST_UP.V1_DN	84	-0.621538	-1.69201	0	0.0355473	0.103	1777	tags=42%, list=16%, signal=49%
PTEN_DN.V1_DN	47	-0.644521	-1.63308	0.00616523	0.0741226	0.255	1743	tags=40%, list=16%, signal=48%
MYC_UP.V1_UP	138	-0.565795	-1.61933	0	0.0722488	0.309	2520	tags=46%, list=23%, signal=59%
MEL18_DN.V1_UP	65	-0.611904	-1.61547	0.00362757	0.0628239	0.321	1149	tags=32%, list=10%, signal=36%
RELA_DN.V1_DN	32	-0.661686	-1.59166	0.0070028	0.076597	0.42	1907	tags=50%, list=17%, signal=60%
ESC_V6.5_UP_EARLY.V1_DN	87	-0.575077	-1.58349	0	0.0748554	0.457	1645	tags=37%, list=15%, signal=43%
PKCA_DN.V1_UP	60	-0.609103	-1.57328	0.004914	0.0762732	0.512	1442	tags=33%, list=13%, signal=38%
AKT_UP.V1_DN	109	-0.556949	-1.56614	0	0.0754969	0.543	1358	tags=28%, list=12%, signal=31%
STK33_SKM_DN	155	-0.532207	-1.54851	0.00107643	0.0879584	0.632	1946	tags=38%, list=18%, signal=46%
CTIP_DN.V1_UP	25	-0.671907	-1.54775	0.0211566	0.0815412	0.637	1817	tags=52%, list=16%, signal=62%
AKT_UP_MTOR_DN.V1_DN	117	-0.55004	-1.54653	0.00108696	0.0768005	0.647	2175	tags=39%, list=20%, signal=48%
CSR_LATE_UP.V1_DN	99	-0.556627	-1.54586	0.00112867	0.0719526	0.649	1119	tags=23%, list=10%, signal=26%
ATF2_UP.V1_UP	76	-0.558554	-1.53217	0.00476191	0.0815855	0.717	1227	tags=21%, list=11%, signal=24%
ATF2_UP.V1_DN	90	-0.548203	-1.51765	0.00571429	0.0948035	0.798	933	tags=20%, list=8%, signal=22%
GCNP_SHH_UP_LATE.V1_DN	108	-0.539692	-1.50709	0.00334076	0.10304	0.839	2039	tags=34%, list=18%, signal=42%
CAHOY_NEURONAL	35	-0.621642	-1.50697	0.0380577	0.0974264	0.839	1511	tags=40%, list=14%, signal=46%
KRAS.600_UP.V1_DN	71	-0.554454	-1.50067	0.0160183	0.100032	0.863	1563	tags=35%, list=14%, signal=41%
ALK_DN.V1_UP	48	-0.585768	-1.49405	0.0188679	0.102443	0.879	1576	tags=27%, list=14%, signal=31%
KRAS.600.LUNG.BREAST_UP.V1_UP	76	-0.55815	-1.49317	0.0139535	0.0984126	0.879	1561	tags=34%, list=14%, signal=40%
BMI1_DN.V1_UP	64	-0.563409	-1.49105	0.0119617	0.0958783	0.879	1006	tags=30%, list=9%, signal=32%
NFE2L2.V2	203	-0.51035	-1.48446	0	0.0993563	0.901	1743	tags=25%, list=16%, signal=29%
BMI1_DN_MEL18_DN.V1_DN	80	-0.552393	-1.48316	0.0105263	0.0966749	0.909	1709	tags=43%, list=15%, signal=50%
ATF2_S_UP.V1_UP	81	-0.538008	-1.47216	0.0153302	0.105367	0.928	1264	tags=30%, list=11%, signal=33%
STK33_DN	183	-0.505514	-1.47119	0.0031746	0.102536	0.929	1881	tags=32%, list=17%, signal=38%
BRCA1_DN.V1_UP	33	-0.599859	-1.45935	0.0472441	0.112725	0.946	983	tags=27%, list=9%, signal=30%
KRAS.AMP.LUNG_UP.V1_UP	26	-0.637223	-1.45486	0.0405028	0.114038	0.952	1400	tags=35%, list=13%, signal=40%
WNT_UP.V1_UP	74	-0.532145	-1.44419	0.0231214	0.123338	0.969	1907	tags=35%, list=17%, signal=42%
BRCA1_DN.V1_DN	60	-0.537193	-1.41952	0.0282209	0.154568	0.991	1873	tags=33%, list=17%, signal=40%
PIGF_UP.V1_DN	81	-0.522296	-1.41903	0.0290023	0.149996	0.992	1669	tags=27%, list=15%, signal=32%
PKCA_DN.V1_DN	79	-0.524951	-1.41549	0.0275862	0.150398	0.992	1698	tags=32%, list=15%, signal=37%
P53_DN.V2_UP	37	-0.573627	-1.40698	0.0568032	0.159646	0.993	1766	tags=38%, list=16%, signal=45%
KRAS.300_UP.V1_DN	31	-0.58754	-1.4063	0.059761	0.156236	0.993	983	tags=29%, list=9%, signal=32%
YAP1_UP	33	-0.579093	-1.40094	0.0748387	0.159747	0.994	1698	tags=24%, list=15%, signal=29%
P53_DN.V1_DN	111	-0.501205	-1.38898	0.0276549	0.174942	0.997	2109	tags=38%, list=19%, signal=46%
STK33_NOMO_DN	166	-0.473703	-1.38053	0.021322	0.185072	1	1788	tags=30%, list=16%, signal=35%
RAPA_EARLY_UP.V1_UP	88	-0.503256	-1.37458	0.0386803	0.191713	1	1362	tags=20%, list=12%, signal=23%
CRX_DN.V1_DN	76	-0.514273	-1.37115	0.0451306	0.192929	1	793	tags=22%, list=7%, signal=24%
PRC2_EZH2_UP.V1_DN	97	-0.492972	-1.37065	0.045819	0.188754	1	1765	tags=32%, list=16%, signal=38%
RAF_UP.V1_DN	136	-0.477983	-1.37022	0.0226782	0.184805	1	2069	tags=31%, list=19%, signal=38%
DCA_UP.V1_UP	71	-0.507564	-1.37019	0.0569106	0.180499	1	1894	tags=28%, list=17%, signal=34%
P53_DN.V2_DN	69	-0.514467	-1.36383	0.0608272	0.187071	1	1106	tags=23%, list=10%, signal=26%
RPS14_DN.V1_UP	66	-0.511517	-1.353	0.0803357	0.201166	1	1108	tags=30%, list=10%, signal=33%
SNF5_DN.V1_UP	92	-0.481902	-1.34246	0.0513699	0.215362	1	1475	tags=22%, list=13%, signal=25%
NRL_DN.V1_UP	78	-0.502658	-1.34225	0.0611765	0.210876	1	912	tags=18%, list=8%, signal=19%
KRAS.BREAST_UP.V1_UP	28	-0.56975	-1.33645	0.119303	0.21708	1	1509	tags=32%, list=14%, signal=37%
LTE2_UP.V1_DN	134	-0.46358	-1.31555	0.0515021	0.255525	1	1290	tags=25%, list=12%, signal=28%
KRAS.DF.V1_UP	134	-0.461969	-1.31268	0.052973	0.256269	1	1411	tags=21%, list=13%, signal=24%
RB_P130_DN.V1_UP	73	-0.486723	-1.30259	0.0950704	0.272617	1	2733	tags=40%, list=25%, signal=52%
MEK_UP.V1_UP	125	-0.45835	-1.30166	0.0730397	0.269019	1	1181	tags=24%, list=11%, signal=27%
ESC_J1_UP_LATE.V1_DN	130	-0.458534	-1.30041	0.0671723	0.266235	1	1886	tags=26%, list=17%, signal=31%
CRX_NRL_DN.V1_UP	73	-0.486492	-1.30002	0.101655	0.262022	1	1471	tags=26%, list=13%, signal=30%
BMI1_DN.V1_DN	85	-0.461276	-1.27443	0.118048	0.315198	1	1556	tags=29%, list=14%, signal=34%
LTE2_UP.V1_UP	138	-0.447025	-1.27369	0.0694143	0.311184	1	1193	tags=17%, list=11%, signal=18%
HOXA9_DN.V1_DN	139	-0.45087	-1.27347	0.073197	0.306124	1	1977	tags=25%, list=18%, signal=30%
KRAS.LUNG.BREAST_UP.V1_DN	42	-0.506453	-1.2711	0.153846	0.305842	1	1777	tags=31%, list=16%, signal=37%
MEL18_DN.V1_DN	82	-0.471858	-1.26711	0.126304	0.309393	1	1488	tags=32%, list=13%, signal=36%
CRX_NRL_DN.V1_DN	83	-0.461693	-1.26323	0.13161	0.313147	1	1190	tags=22%, list=11%, signal=24%
BMI1_DN_MEL18_DN.V1_UP	68	-0.468352	-1.25023	0.151149	0.338288	1	1429	tags=29%, list=13%, signal=34%
LEF1_UP.V1_DN	102	-0.449355	-1.24666	0.12932	0.341185	1	1326	tags=26%, list=12%, signal=30%
BCAT_BILD_ET_AL_UP	29	-0.518215	-1.24046	0.193461	0.351336	1	487	tags=14%, list=4%, signal=14%
CAHOY_ASTROGLIAL	41	-0.488401	-1.23548	0.191436	0.35759	1	891	tags=24%, list=8%, signal=26%
JNK_DN.V1_UP	78	-0.459212	-1.23291	0.152681	0.357751	1	1342	tags=26%, list=12%, signal=29%
ATF2_S_UP.V1_DN	81	-0.451192	-1.23081	0.135104	0.357591	1	1765	tags=27%, list=16%, signal=32%
CYCLIN_D1_KE_.V1_DN	85	-0.445878	-1.22589	0.15814	0.364467	1	845	tags=13%, list=8%, signal=14%
IL21_UP.V1_DN	59	-0.468957	-1.21538	0.192308	0.386269	1	1635	tags=34%, list=15%, signal=40%
CTIP_DN.V1_DN	50	-0.478764	-1.21052	0.20229	0.392298	1	972	tags=26%, list=9%, signal=28%
MEK_UP.V1_DN	130	-0.429859	-1.21032	0.136706	0.387087	1	1279	tags=18%, list=12%, signal=20%
JNK_DN.V1_DN	92	-0.439115	-1.20913	0.153584	0.384291	1	1977	tags=30%, list=18%, signal=37%
PRC2_SUZ12_UP.V1_DN	70	-0.446216	-1.20362	0.169719	0.393026	1	1817	tags=27%, list=16%, signal=32%
KRAS.600_UP.V1_UP	105	-0.432744	-1.2032	0.158857	0.388788	1	1209	tags=23%, list=11%, signal=25%
E2F3_UP.V1_UP	132	-0.422441	-1.20048	0.153173	0.389898	1	1798	tags=32%, list=16%, signal=38%
PRC2_EZH2_UP.V1_UP	126	-0.424648	-1.19989	0.16577	0.386143	1	2924	tags=39%, list=26%, signal=52%
KRAS.KIDNEY_UP.V1_UP	79	-0.443563	-1.19593	0.213626	0.390568	1	1496	tags=32%, list=14%, signal=36%
KRAS.BREAST_UP.V1_DN	47	-0.468619	-1.19414	0.219024	0.389941	1	1771	tags=40%, list=16%, signal=48%
EGFR_UP.V1_DN	141	-0.417594	-1.19245	0.161504	0.389087	1	1213	tags=19%, list=11%, signal=21%
EIF4E_DN	75	-0.444481	-1.19121	0.188591	0.387247	1	1233	tags=16%, list=11%, signal=18%
NRL_DN.V1_DN	82	-0.436881	-1.18256	0.195804	0.403017	1	2638	tags=35%, list=24%, signal=46%
RB_P107_DN.V1_UP	105	-0.420504	-1.18081	0.183371	0.401983	1	2593	tags=31%, list=23%, signal=41%
RPS14_DN.V1_DN	140	-0.409399	-1.17185	0.167556	0.419262	1	2626	tags=33%, list=24%, signal=43%
P53_DN.V1_UP	118	-0.416649	-1.1703	0.1939	0.418062	1	1540	tags=26%, list=14%, signal=30%
BCAT.100_UP.V1_DN	18	-0.541538	-1.16652	0.28209	0.42233	1	494	tags=11%, list=4%, signal=12%
RB_DN.V1_DN	89	-0.423238	-1.16029	0.236633	0.432694	1	1151	tags=18%, list=10%, signal=20%
SNF5_DN.V1_DN	74	-0.431551	-1.15922	0.24497	0.430458	1	1343	tags=27%, list=12%, signal=31%
VEGF_A_UP.V1_UP	82	-0.418869	-1.14418	0.265446	0.462618	1	1182	tags=22%, list=11%, signal=24%
CAMP_UP.V1_DN	150	-0.395805	-1.14345	0.228202	0.45935	1	1181	tags=16%, list=11%, signal=18%
MTOR_UP.V1_DN	104	-0.413317	-1.14086	0.23608	0.460453	1	778	tags=12%, list=7%, signal=12%
KRAS.LUNG.BREAST_UP.V1_UP	37	-0.460069	-1.13825	0.303268	0.461184	1	1387	tags=30%, list=13%, signal=34%
IL2_UP.V1_UP	92	-0.41394	-1.136	0.262125	0.461589	1	837	tags=22%, list=8%, signal=23%
CSR_LATE_UP.V1_UP	135	-0.393642	-1.12532	0.261105	0.482451	1	2739	tags=32%, list=25%, signal=42%
ERB2_UP.V1_DN	155	-0.393487	-1.11948	0.277538	0.491717	1	1013	tags=8%, list=9%, signal=9%
PDGF_ERK_DN.V1_UP	95	-0.402319	-1.11882	0.281755	0.48817	1	1216	tags=16%, list=11%, signal=18%
EGFR_UP.V1_UP	123	-0.39241	-1.11403	0.291304	0.494898	1	1576	tags=27%, list=14%, signal=31%
SRC_UP.V1_UP	62	-0.422238	-1.10506	0.334138	0.513239	1	2714	tags=40%, list=25%, signal=53%
IL15_UP.V1_DN	59	-0.421415	-1.1035	0.311057	0.51195	1	1165	tags=25%, list=11%, signal=28%
PTEN_DN.V1_UP	60	-0.41628	-1.09889	0.352381	0.518219	1	1663	tags=32%, list=15%, signal=37%
KRAS.DF.V1_DN	95	-0.395601	-1.09728	0.32417	0.517148	1	1074	tags=15%, list=10%, signal=16%
PRC2_SUZ12_UP.V1_UP	73	-0.405813	-1.09012	0.350467	0.529155	1	2371	tags=26%, list=21%, signal=33%
KRAS.LUNG_UP.V1_DN	30	-0.458938	-1.08737	0.361257	0.530652	1	1148	tags=27%, list=10%, signal=30%
MTOR_UP.N4.V1_UP	157	-0.37757	-1.08704	0.318919	0.526204	1	1613	tags=21%, list=15%, signal=24%
CYCLIN_D1_UP.V1_UP	98	-0.393852	-1.08131	0.348758	0.535109	1	2281	tags=31%, list=21%, signal=38%
IL2_UP.V1_DN	83	-0.400727	-1.07759	0.360371	0.538909	1	1649	tags=29%, list=15%, signal=34%
IL21_UP.V1_UP	64	-0.398472	-1.06323	0.375306	0.569384	1	1604	tags=25%, list=14%, signal=29%
RAF_UP.V1_UP	139	-0.37102	-1.05786	0.38	0.576979	1	1213	tags=18%, list=11%, signal=20%
WNT_UP.V1_DN	78	-0.382956	-1.04955	0.400463	0.591998	1	861	tags=12%, list=8%, signal=12%
LEF1_UP.V1_UP	95	-0.379295	-1.04541	0.432127	0.596672	1	1488	tags=27%, list=13%, signal=31%
ESC_V6.5_UP_LATE.V1_DN	110	-0.368339	-1.04148	0.404255	0.600634	1	1645	tags=27%, list=15%, signal=32%
JAK2_DN.V1_UP	55	-0.401304	-1.04091	0.437424	0.596552	1	2330	tags=42%, list=21%, signal=53%
SRC_UP.V1_DN	92	-0.378234	-1.03474	0.400463	0.605725	1	2094	tags=28%, list=19%, signal=35%
SIRNA_EIF4GI_DN	71	-0.389119	-1.03181	0.42217	0.607287	1	2512	tags=24%, list=23%, signal=31%
PRC1_BMI_UP.V1_DN	66	-0.382725	-1.02356	0.44029	0.62114	1	1875	tags=26%, list=17%, signal=31%
E2F1_UP.V1_DN	117	-0.361357	-1.01512	0.459579	0.636443	1	1615	tags=23%, list=15%, signal=27%
BCAT_GDS748_UP	32	-0.42091	-1.0107	0.473262	0.64087	1	634	tags=16%, list=6%, signal=17%
CAHOY_ASTROCYTIC	58	-0.376386	-0.992034	0.482252	0.678431	1	1576	tags=24%, list=14%, signal=28%
ESC_V6.5_UP_LATE.V1_UP	122	-0.345277	-0.978652	0.515284	0.704935	1	1633	tags=23%, list=15%, signal=27%
PRC1_BMI_UP.V1_UP	58	-0.370731	-0.977635	0.544676	0.701548	1	1716	tags=26%, list=15%, signal=30%
ERB2_UP.V1_UP	112	-0.346473	-0.973976	0.517817	0.70405	1	1181	tags=21%, list=11%, signal=23%
DCA_UP.V1_DN	103	-0.348438	-0.973819	0.532646	0.698584	1	1642	tags=21%, list=15%, signal=25%
KRAS.PROSTATE_UP.V1_UP	39	-0.394167	-0.964064	0.540921	0.714841	1	1209	tags=21%, list=11%, signal=23%
NOTCH_DN.V1_DN	59	-0.371936	-0.962662	0.540024	0.712043	1	912	tags=15%, list=8%, signal=17%
CORDENONSI_YAP_CONSERVED_SIGNATURE	43	-0.384092	-0.962145	0.538462	0.707326	1	596	tags=14%, list=5%, signal=15%
RAPA_EARLY_UP.V1_DN	107	-0.339416	-0.942524	0.585746	0.745996	1	2241	tags=27%, list=20%, signal=34%
MTOR_UP.V1_UP	98	-0.340884	-0.94177	0.582864	0.741663	1	1753	tags=18%, list=16%, signal=22%
NOTCH_DN.V1_UP	72	-0.348643	-0.941642	0.576471	0.736008	1	1048	tags=15%, list=9%, signal=17%
AKT_UP.V1_UP	95	-0.336971	-0.93432	0.612176	0.745386	1	816	tags=15%, list=7%, signal=16%
STK33_NOMO_UP	176	-0.31822	-0.931837	0.644068	0.744774	1	644	tags=10%, list=6%, signal=11%
CAHOY_OLIGODENDROCUTIC	56	-0.355167	-0.922722	0.61697	0.75802	1	1580	tags=29%, list=14%, signal=33%
CRX_DN.V1_UP	63	-0.351421	-0.918619	0.610048	0.760712	1	1251	tags=19%, list=11%, signal=21%
KRAS.PROSTATE_UP.V1_DN	34	-0.377093	-0.905433	0.634794	0.781994	1	1778	tags=38%, list=16%, signal=45%
KRAS.300_UP.V1_UP	54	-0.348491	-0.900418	0.640741	0.786139	1	1800	tags=30%, list=16%, signal=35%
CYCLIN_D1_KE_.V1_UP	126	-0.318537	-0.89772	0.688742	0.785197	1	1767	tags=17%, list=16%, signal=21%
PTEN_DN.V2_UP	56	-0.341806	-0.885332	0.651534	0.802914	1	1156	tags=20%, list=10%, signal=22%
TBK1.DN.48HRS_UP	43	-0.356	-0.884528	0.63949	0.798657	1	3304	tags=37%, list=30%, signal=53%
GLI1_UP.V1_DN	18	-0.414952	-0.882988	0.63104	0.795563	1	4109	tags=44%, list=37%, signal=71%
ESC_J1_UP_LATE.V1_UP	99	-0.313931	-0.881397	0.700688	0.792752	1	1595	tags=24%, list=14%, signal=28%
ATM_DN.V1_DN	41	-0.345464	-0.864501	0.668892	0.817808	1	923	tags=17%, list=8%, signal=19%
ESC_V6.5_UP_EARLY.V1_UP	92	-0.312608	-0.863336	0.737908	0.813882	1	1339	tags=14%, list=12%, signal=16%
CYCLIN_D1_UP.V1_DN	108	-0.306806	-0.849608	0.758465	0.831933	1	809	tags=10%, list=7%, signal=11%
GCNP_SHH_UP_LATE.V1_UP	141	-0.294577	-0.846582	0.775974	0.831392	1	2869	tags=28%, list=26%, signal=38%
TBK1.DF_UP	222	-0.284476	-0.842703	0.81677	0.83278	1	1720	tags=18%, list=16%, signal=21%
GCNP_SHH_UP_EARLY.V1_DN	91	-0.303586	-0.840109	0.74512	0.831397	1	987	tags=15%, list=9%, signal=17%
RB_P107_DN.V1_DN	101	-0.298531	-0.83268	0.7875	0.837871	1	2111	tags=22%, list=19%, signal=27%
PRC2_EDD_UP.V1_UP	134	-0.291175	-0.83249	0.78913	0.832456	1	3227	tags=37%, list=29%, signal=51%
EIF4E_UP	66	-0.30425	-0.80082	0.792019	0.876165	1	1831	tags=24%, list=17%, signal=29%
ESC_J1_UP_EARLY.V1_DN	109	-0.285289	-0.800408	0.822072	0.870813	1	1526	tags=18%, list=14%, signal=21%
ESC_J1_UP_EARLY.V1_UP	91	-0.284079	-0.780227	0.849487	0.894939	1	1586	tags=21%, list=14%, signal=24%
RB_P130_DN.V1_DN	101	-0.277101	-0.775263	0.867117	0.89551	1	605	tags=6%, list=5%, signal=6%
TBK1.DN.48HRS_DN	43	-0.305903	-0.76984	0.815789	0.896778	1	2372	tags=21%, list=21%, signal=27%
CAMP_UP.V1_UP	159	-0.262329	-0.757792	0.897216	0.906404	1	2481	tags=19%, list=22%, signal=25%
GLI1_UP.V1_UP	18	-0.343007	-0.745591	0.78602	0.914992	1	1125	tags=11%, list=10%, signal=12%
VEGF_A_UP.V1_DN	159	-0.249795	-0.72043	0.951665	0.937789	1	1739	tags=11%, list=16%, signal=13%
RB_DN.V1_UP	96	-0.256104	-0.703193	0.929785	0.948672	1	2130	tags=21%, list=19%, signal=26%
CSR_EARLY_UP.V1_UP	130	-0.227899	-0.653089	0.98259	0.980141	1	1387	tags=12%, list=13%, signal=14%
E2F1_UP.V1_UP	159	-0.225542	-0.648804	0.98927	0.976256	1	1605	tags=10%, list=14%, signal=12%
TBK1.DF_DN	249	-0.206265	-0.615697	1	0.985217	1	1320	tags=9%, list=12%, signal=10%
GCNP_SHH_UP_EARLY.V1_UP	127	-0.180857	-0.511593	1	0.997368	1	2778	tags=20%, list=25%, signal=27%

## Sheet: combined_up
NAME	SIZE	ES	NES	NOM p-val	FDR q-val	FWER p-val	RANK AT MAX	LEADING EDGE
STK33_SKM_UP	166	0.517653	1.99644	0	0	0	1124	tags=34%, list=10%, signal=37%
MTOR_UP.N4.V1_DN	129	0.498668	1.85517	0	0.00718404	0.014	1781	tags=38%, list=16%, signal=45%
PRC2_EDD_UP.V1_DN	90	0.454329	1.61856	0	0.0556752	0.153	1237	tags=27%, list=11%, signal=30%
STK33_UP	174	0.417103	1.59816	0	0.0498277	0.177	976	tags=26%, list=9%, signal=29%
BCAT_BILD_ET_AL_DN	41	0.472036	1.49406	0.018018	0.0987087	0.376	1982	tags=37%, list=18%, signal=44%
HOXA9_DN.V1_UP	120	0.406139	1.49307	0	0.0826396	0.378	1522	tags=28%, list=14%, signal=32%
TGFB_UP.V1_DN	116	0.397028	1.45244	0	0.098165	0.482	1531	tags=26%, list=14%, signal=30%
YAP1_DN	21	0.523522	1.43779	0.0469314	0.09759	0.526	1462	tags=29%, list=13%, signal=33%
KRAS.50_UP.V1_UP	23	0.521145	1.41982	0.0719425	0.0987111	0.57	758	tags=30%, list=7%, signal=33%
PTEN_DN.V2_DN	85	0.391229	1.36596	0.0238095	0.131725	0.706	848	tags=16%, list=8%, signal=18%
PDGF_ERK_DN.V1_DN	121	0.366859	1.35678	0.0111111	0.128816	0.724	1169	tags=18%, list=11%, signal=20%
TGFB_UP.V1_UP	110	0.358016	1.35668	0.0373832	0.118081	0.724	1045	tags=23%, list=9%, signal=25%
E2F3_UP.V1_DN	56	0.403006	1.29485	0.0645161	0.162589	0.872	1239	tags=21%, list=11%, signal=24%
MYC_UP.V1_DN	71	0.369848	1.27795	0.0882353	0.169537	0.912	1005	tags=23%, list=9%, signal=25%
IL15_UP.V1_UP	94	0.340808	1.25517	0.0833333	0.18204	0.933	732	tags=18%, list=7%, signal=19%
CSR_EARLY_UP.V1_DN	99	0.319779	1.18954	0.15873	0.261565	0.98	971	tags=21%, list=9%, signal=23%
JAK2_DN.V1_DN	85	0.325942	1.17072	0.155039	0.277328	0.99	2648	tags=44%, list=24%, signal=57%
RELA_DN.V1_UP	64	0.344304	1.16492	0.182927	0.270229	0.991	445	tags=13%, list=4%, signal=13%
AKT_UP_MTOR_DN.V1_UP	100	0.321515	1.15172	0.169492	0.276555	0.994	641	tags=20%, list=6%, signal=21%
PIGF_UP.V1_UP	155	0.294249	1.15117	0.0441177	0.264013	0.994	1825	tags=19%, list=16%, signal=22%
BCAT_GDS748_DN	37	0.373215	1.14809	0.244726	0.256268	0.994	2207	tags=38%, list=20%, signal=47%
KRAS.AMP.LUNG_UP.V1_DN	43	0.352381	1.11969	0.254464	0.29043	0.997	1056	tags=30%, list=10%, signal=33%
PDGF_UP.V1_UP	119	0.288659	1.09613	0.236559	0.320397	0.999	801	tags=10%, list=7%, signal=11%
KRAS.LUNG_UP.V1_UP	34	0.361643	1.07892	0.346154	0.341286	1	550	tags=21%, list=5%, signal=22%
BCAT.100_UP.V1_UP	21	0.39388	1.04398	0.380952	0.398524	1	200	tags=19%, list=2%, signal=19%
PDGF_UP.V1_DN	46	0.330493	1.04115	0.380711	0.389969	1	752	tags=20%, list=7%, signal=21%
SIRNA_EIF4GI_UP	78	0.251982	0.901912	0.737226	0.710208	1	1792	tags=18%, list=16%, signal=21%
ATM_DN.V1_UP	37	0.284646	0.855107	0.741071	0.784029	1	1176	tags=24%, list=11%, signal=27%
