# Supplementary material for: Targeting MYCN-Driven Transcription By BET-Bromodomain Inhibition
Source: Oxford University Press journal article supplement (doi:10.1158/1078-0432.ccr-15-1449), 2015-12-02
Supplement: 10780432ccr151449-sup-151434_1_supp_3180669_nw2ppl.xlsx [file 10780432ccr151449-sup-151434_1_supp_3180669_nw2ppl.xlsx]

## Sheet: OTX015_down
NAME	SIZE	ES	NES	NOM p-val	FDR q-val	FWER p-val	RANK AT MAX	LEADING EDGE
SYNAPTIC_TRANSMISSION	69	-0.68031	-1.74736	0	0.0780309	0.078	1216	tags=29%, list=11%, signal=32%
TRANSMISSION_OF_NERVE_IMPULSE	77	-0.673385	-1.7079	0	0.105421	0.199	1216	tags=27%, list=11%, signal=30%
SECOND_MESSENGER_MEDIATED_SIGNALING	45	-0.701238	-1.70133	0.00119617	0.0842889	0.236	1032	tags=31%, list=9%, signal=34%
G_PROTEIN_COUPLED_RECEPTOR_PROTEIN_SIGNALING_PATHWAY	98	-0.647562	-1.68531	0	0.0868449	0.308	1353	tags=29%, list=12%, signal=32%
POSITIVE_REGULATION_OF_MAP_KINASE_ACTIVITY	31	-0.728672	-1.6569	0.00380711	0.117857	0.471	730	tags=32%, list=7%, signal=34%
REGULATION_OF_CELL_MIGRATION	15	-0.810405	-1.64412	0.00138696	0.12432	0.555	369	tags=20%, list=3%, signal=21%
G_PROTEIN_SIGNALING_COUPLED_TO_CAMP_NUCLEOTIDE_SECOND_MESSENGER	21	-0.746753	-1.63755	0.00682128	0.118966	0.598	1032	tags=43%, list=9%, signal=47%
G_PROTEIN_SIGNALING_COUPLED_TO_CYCLIC_NUCLEOTIDE_SECOND_MESSENGER	28	-0.723051	-1.63431	0.00645161	0.109248	0.61	1032	tags=36%, list=9%, signal=39%
CYCLIC_NUCLEOTIDE_MEDIATED_SIGNALING	30	-0.715735	-1.62599	0.00125156	0.109265	0.653	1032	tags=33%, list=9%, signal=37%
CELL_CELL_SIGNALING	133	-0.59755	-1.60181	0.00105708	0.143733	0.777	1661	tags=31%, list=15%, signal=36%
CAMP_MEDIATED_SIGNALING	22	-0.743996	-1.60049	0.00671141	0.133944	0.785	1032	tags=41%, list=9%, signal=45%
REGULATION_OF_MAP_KINASE_ACTIVITY	45	-0.661878	-1.5998	0.00372208	0.123917	0.789	730	tags=27%, list=7%, signal=28%
ION_HOMEOSTASIS	50	-0.630893	-1.56994	0.00840336	0.182235	0.927	1353	tags=24%, list=12%, signal=27%
NEUROLOGICAL_SYSTEM_PROCESS	137	-0.584058	-1.56982	0	0.169496	0.927	1524	tags=25%, list=14%, signal=28%
POSITIVE_REGULATION_OF_TRANSFERASE_ACTIVITY	56	-0.626691	-1.55281	0.00821596	0.205745	0.97	730	tags=25%, list=7%, signal=27%
IMMUNE_RESPONSE	63	-0.61671	-1.55096	0.00232829	0.197958	0.97	1265	tags=24%, list=11%, signal=27%
SYSTEM_PROCESS	201	-0.54891	-1.5115	0	0.309214	0.998	1543	tags=25%, list=14%, signal=28%
POSITIVE_REGULATION_OF_CATALYTIC_ACTIVITY	100	-0.576753	-1.50577	0.00324324	0.313063	0.999	1920	tags=34%, list=17%, signal=41%
CHEMICAL_HOMEOSTASIS	62	-0.582291	-1.4919	0.0173611	0.347421	0.999	1353	tags=19%, list=12%, signal=22%
REGULATION_OF_JNK_ACTIVITY	15	-0.728129	-1.49052	0.0352113	0.335025	0.999	1398	tags=40%, list=13%, signal=46%
ACTIVATION_OF_MAPK_ACTIVITY	26	-0.675172	-1.48943	0.0277045	0.323588	0.999	1456	tags=38%, list=13%, signal=44%
EXOCYTOSIS	15	-0.721773	-1.48205	0.0422125	0.333675	1	1347	tags=33%, list=12%, signal=38%
CELLULAR_COMPONENT_DISASSEMBLY	28	-0.649784	-1.47069	0.0367454	0.362233	1	1402	tags=21%, list=13%, signal=24%
REGULATION_OF_CYTOSKELETON_ORGANIZATION_AND_BIOGENESIS	27	-0.666448	-1.46949	0.0269231	0.35105	1	1086	tags=22%, list=10%, signal=25%
APOPTOTIC_NUCLEAR_CHANGES	18	-0.701595	-1.46868	0.0395634	0.339956	1	244	tags=11%, list=2%, signal=11%
CELL_CELL_ADHESION	35	-0.624578	-1.46635	0.0315259	0.335422	1	1816	tags=29%, list=16%, signal=34%
BRAIN_DEVELOPMENT	34	-0.638936	-1.46575	0.0419753	0.324985	1	1735	tags=35%, list=16%, signal=42%
SKELETAL_MUSCLE_DEVELOPMENT	16	-0.708186	-1.46464	0.034632	0.317741	1	956	tags=19%, list=9%, signal=20%
CATION_HOMEOSTASIS	41	-0.60621	-1.46429	0.0257038	0.308197	1	1353	tags=27%, list=12%, signal=30%
CELLULAR_CATION_HOMEOSTASIS	40	-0.620019	-1.463	0.0312125	0.301717	1	1353	tags=28%, list=12%, signal=31%
STRIATED_MUSCLE_DEVELOPMENT	24	-0.663116	-1.44746	0.0543767	0.341639	1	1091	tags=21%, list=10%, signal=23%
RESPONSE_TO_VIRUS	19	-0.680243	-1.44596	0.0568655	0.336199	1	733	tags=21%, list=7%, signal=23%
NUCLEAR_ORGANIZATION_AND_BIOGENESIS	23	-0.656987	-1.4455	0.0501931	0.327548	1	244	tags=9%, list=2%, signal=9%
CELL_STRUCTURE_DISASSEMBLY_DURING_APOPTOSIS	15	-0.707942	-1.44523	0.0648276	0.31883	1	244	tags=13%, list=2%, signal=14%
REGULATION_OF_ORGANELLE_ORGANIZATION_AND_BIOGENESIS	37	-0.61076	-1.43417	0.0378973	0.347561	1	1086	tags=19%, list=10%, signal=21%
CELL_SURFACE_RECEPTOR_LINKED_SIGNAL_TRANSDUCTION_GO_0007166	250	-0.519532	-1.43012	0.00101833	0.350866	1	1072	tags=21%, list=10%, signal=23%
JNK_CASCADE	37	-0.605922	-1.42735	0.0598504	0.350763	1	702	tags=19%, list=6%, signal=20%
PATTERN_SPECIFICATION_PROCESS	22	-0.64821	-1.4198	0.0749014	0.368	1	1123	tags=27%, list=10%, signal=30%
DNA_CATABOLIC_PROCESS	21	-0.656593	-1.41804	0.0766182	0.364856	1	2286	tags=33%, list=21%, signal=42%
RESPONSE_TO_OTHER_ORGANISM	24	-0.640187	-1.41004	0.0709505	0.383456	1	733	tags=17%, list=7%, signal=18%
CELLULAR_HOMEOSTASIS	60	-0.575372	-1.40882	0.030647	0.378242	1	1353	tags=20%, list=12%, signal=23%
POSITIVE_REGULATION_OF_TRANSCRIPTIONDNA_DEPENDENT	89	-0.547969	-1.40187	0.0228758	0.392911	1	1311	tags=21%, list=12%, signal=24%
BEHAVIOR	39	-0.588643	-1.39428	0.0622665	0.411322	1	1088	tags=23%, list=10%, signal=26%
STRESS_ACTIVATED_PROTEIN_KINASE_SIGNALING_PATHWAY	39	-0.597983	-1.3874	0.0668317	0.426668	1	702	tags=18%, list=6%, signal=19%
POSITIVE_REGULATION_OF_RNA_METABOLIC_PROCESS	91	-0.530008	-1.37991	0.0377155	0.444639	1	1311	tags=21%, list=12%, signal=23%
INDUCTION_OF_APOPTOSIS_BY_EXTRACELLULAR_SIGNALS	19	-0.653033	-1.37607	0.0917942	0.449844	1	1398	tags=21%, list=13%, signal=24%
POSITIVE_REGULATION_OF_TRANSCRIPTION_FROM_RNA_POLYMERASE_II_PROMOTER	52	-0.56667	-1.37201	0.0505288	0.456212	1	977	tags=21%, list=9%, signal=23%
CELL_MIGRATION	49	-0.565392	-1.36319	0.0813954	0.479434	1	537	tags=12%, list=5%, signal=13%
POSITIVE_REGULATION_OF_TRANSCRIPTION	108	-0.515548	-1.35394	0.0377155	0.506035	1	1311	tags=20%, list=12%, signal=23%
CARBOXYLIC_ACID_TRANSPORT	25	-0.607331	-1.35212	0.0986842	0.503467	1	1293	tags=32%, list=12%, signal=36%
VASCULATURE_DEVELOPMENT	26	-0.597978	-1.34928	0.0900783	0.50557	1	1088	tags=19%, list=10%, signal=21%
I_KAPPAB_KINASE_NF_KAPPAB_CASCADE	81	-0.522202	-1.34787	0.0567929	0.501147	1	1580	tags=21%, list=14%, signal=24%
POSITIVE_REGULATION_OF_MULTICELLULAR_ORGANISMAL_PROCESS	20	-0.624622	-1.34641	0.121585	0.49761	1	1432	tags=15%, list=13%, signal=17%
ANATOMICAL_STRUCTURE_FORMATION	28	-0.583781	-1.33815	0.109137	0.519984	1	1088	tags=25%, list=10%, signal=28%
IMMUNE_SYSTEM_PROCESS	109	-0.509393	-1.33718	0.0458911	0.514538	1	1265	tags=17%, list=11%, signal=19%
MONOVALENT_INORGANIC_CATION_TRANSPORT	27	-0.596064	-1.33595	0.121134	0.509718	1	1786	tags=44%, list=16%, signal=53%
REGULATION_OF_INTRACELLULAR_TRANSPORT	16	-0.648426	-1.33486	0.133427	0.504853	1	894	tags=19%, list=8%, signal=20%
ORGANIC_ACID_TRANSPORT	25	-0.607331	-1.33345	0.108355	0.501408	1	1293	tags=32%, list=12%, signal=36%
GLYCOPROTEIN_BIOSYNTHETIC_PROCESS	54	-0.542516	-1.32984	0.0835267	0.507107	1	1711	tags=30%, list=15%, signal=35%
REGULATION_OF_NUCLEOCYTOPLASMIC_TRANSPORT	16	-0.648426	-1.32474	0.137427	0.517281	1	894	tags=19%, list=8%, signal=20%
POSITIVE_REGULATION_OF_NUCLEOBASENUCLEOSIDENUCLEOTIDE_AND_NUCLEIC_ACID_METABOLIC_PROCESS	114	-0.494433	-1.3215	0.0512273	0.521197	1	1311	tags=19%, list=12%, signal=22%
MULTI_ORGANISM_PROCESS	48	-0.546975	-1.31848	0.0890736	0.524332	1	894	tags=15%, list=8%, signal=16%
AMINO_ACID_TRANSPORT	19	-0.614513	-1.31074	0.152448	0.544956	1	1293	tags=32%, list=12%, signal=36%
AMINE_TRANSPORT	23	-0.606584	-1.3107	0.135208	0.536593	1	1293	tags=30%, list=12%, signal=34%
MAPKKK_CASCADE_GO_0000165	73	-0.507122	-1.30216	0.0996564	0.561637	1	730	tags=16%, list=7%, signal=17%
APOPTOTIC_PROGRAM	44	-0.540187	-1.29296	0.118149	0.58884	1	1183	tags=16%, list=11%, signal=18%
REGULATION_OF_TRANSPORT	36	-0.55974	-1.29277	0.132927	0.580778	1	1183	tags=19%, list=11%, signal=22%
GLYCOPROTEIN_METABOLIC_PROCESS	68	-0.5077	-1.28996	0.109447	0.583078	1	1711	tags=28%, list=15%, signal=33%
SPHINGOLIPID_METABOLIC_PROCESS	20	-0.605038	-1.2887	0.160214	0.579536	1	2059	tags=40%, list=19%, signal=49%
RESPONSE_TO_BIOTIC_STIMULUS	50	-0.526087	-1.27109	0.122786	0.642612	1	733	tags=12%, list=7%, signal=13%
LYMPHOCYTE_ACTIVATION	18	-0.598565	-1.271	0.184828	0.633974	1	1432	tags=22%, list=13%, signal=25%
ORGAN_MORPHOGENESIS	73	-0.496287	-1.2645	0.132733	0.652069	1	1184	tags=19%, list=11%, signal=21%
ANGIOGENESIS	21	-0.578032	-1.26425	0.172973	0.644204	1	1088	tags=19%, list=10%, signal=21%
EMBRYONIC_DEVELOPMENT	40	-0.533383	-1.25631	0.162847	0.669568	1	1948	tags=33%, list=18%, signal=39%
ION_TRANSPORT	60	-0.497911	-1.25619	0.152582	0.6612	1	1861	tags=28%, list=17%, signal=34%
NUCLEOTIDE_METABOLIC_PROCESS	27	-0.566543	-1.25119	0.186312	0.67417	1	1244	tags=15%, list=11%, signal=17%
PROTEIN_AMINO_ACID_N_LINKED_GLYCOSYLATION	22	-0.57295	-1.25046	0.2	0.668833	1	1903	tags=32%, list=17%, signal=38%
REGULATION_OF_G_PROTEIN_COUPLED_RECEPTOR_PROTEIN_SIGNALING_PATHWAY	16	-0.597222	-1.24675	0.229692	0.674669	1	1276	tags=38%, list=12%, signal=42%
RESPONSE_TO_LIGHT_STIMULUS	27	-0.556123	-1.2399	0.198953	0.695803	1	731	tags=11%, list=7%, signal=12%
LEUKOCYTE_ACTIVATION	19	-0.57547	-1.23815	0.217207	0.694394	1	1432	tags=21%, list=13%, signal=24%
PROTEIN_KINASE_CASCADE	198	-0.451675	-1.23782	0.0762195	0.687184	1	1694	tags=20%, list=15%, signal=23%
NERVOUS_SYSTEM_DEVELOPMENT	216	-0.454341	-1.23593	0.0608875	0.687171	1	1616	tags=25%, list=15%, signal=29%
CELL_ACTIVATION	19	-0.57547	-1.2343	0.214681	0.685635	1	1432	tags=21%, list=13%, signal=24%
CENTRAL_NERVOUS_SYSTEM_DEVELOPMENT	77	-0.479569	-1.22764	0.16835	0.706029	1	1816	tags=30%, list=16%, signal=35%
REGULATION_OF_MULTICELLULAR_ORGANISMAL_PROCESS	44	-0.511439	-1.22385	0.199759	0.714271	1	1487	tags=23%, list=13%, signal=26%
METAL_ION_TRANSPORT	33	-0.527577	-1.22348	0.225032	0.707683	1	1786	tags=39%, list=16%, signal=47%
MUSCLE_DEVELOPMENT	48	-0.508684	-1.22269	0.185965	0.702857	1	1532	tags=19%, list=14%, signal=22%
STEROID_HORMONE_RECEPTOR_SIGNALING_PATHWAY	17	-0.585317	-1.2212	0.226124	0.701116	1	2660	tags=41%, list=24%, signal=54%
POSITIVE_REGULATION_OF_METABOLIC_PROCESS	151	-0.449977	-1.21956	0.12382	0.700513	1	1660	tags=19%, list=15%, signal=22%
POSITIVE_REGULATION_OF_I_KAPPAB_KINASE_NF_KAPPAB_CASCADE	64	-0.487749	-1.2188	0.181093	0.695838	1	1580	tags=20%, list=14%, signal=24%
MEMBRANE_LIPID_BIOSYNTHETIC_PROCESS	38	-0.52169	-1.21717	0.222363	0.695251	1	1907	tags=24%, list=17%, signal=29%
REGULATION_OF_I_KAPPAB_KINASE_NF_KAPPAB_CASCADE	67	-0.482145	-1.21669	0.181716	0.689744	1	1580	tags=21%, list=14%, signal=24%
NEGATIVE_REGULATION_OF_DEVELOPMENTAL_PROCESS	123	-0.459716	-1.21459	0.128286	0.690525	1	1216	tags=15%, list=11%, signal=17%
POSITIVE_REGULATION_OF_CELLULAR_METABOLIC_PROCESS	148	-0.452901	-1.21026	0.12487	0.700356	1	1660	tags=19%, list=15%, signal=22%
INTRACELLULAR_RECEPTOR_MEDIATED_SIGNALING_PATHWAY	17	-0.585317	-1.20943	0.245152	0.696107	1	2660	tags=41%, list=24%, signal=54%
SYSTEM_DEVELOPMENT	418	-0.432639	-1.20836	0.0541082	0.692942	1	1616	tags=21%, list=15%, signal=23%
NEGATIVE_REGULATION_OF_PROGRAMMED_CELL_DEATH	103	-0.454109	-1.1998	0.165049	0.719987	1	1183	tags=15%, list=11%, signal=16%
RECEPTOR_MEDIATED_ENDOCYTOSIS	18	-0.564501	-1.19765	0.276455	0.722159	1	1183	tags=28%, list=11%, signal=31%
CATION_TRANSPORT	47	-0.497369	-1.1973	0.204848	0.716271	1	1786	tags=30%, list=16%, signal=35%
COFACTOR_METABOLIC_PROCESS	42	-0.495242	-1.19508	0.238329	0.718346	1	1534	tags=17%, list=14%, signal=19%
FATTY_ACID_METABOLIC_PROCESS	35	-0.512125	-1.1942	0.240648	0.714937	1	977	tags=17%, list=9%, signal=19%
SKELETAL_DEVELOPMENT	48	-0.492519	-1.19215	0.202654	0.71619	1	1299	tags=25%, list=12%, signal=28%
INTRACELLULAR_SIGNALING_CASCADE	408	-0.422584	-1.18677	0.065	0.730951	1	1773	tags=19%, list=16%, signal=22%
HOMEOSTATIC_PROCESS	95	-0.456354	-1.18522	0.194415	0.730099	1	1183	tags=12%, list=11%, signal=13%
ANATOMICAL_STRUCTURE_MORPHOGENESIS	210	-0.431692	-1.18363	0.115189	0.72935	1	1228	tags=19%, list=11%, signal=21%
NUCLEOBASENUCLEOSIDE_AND_NUCLEOTIDE_METABOLIC_PROCESS	35	-0.514876	-1.18179	0.256858	0.729747	1	1244	tags=14%, list=11%, signal=16%
ORGAN_DEVELOPMENT	266	-0.427986	-1.17832	0.10404	0.736994	1	1299	tags=16%, list=12%, signal=18%
REGULATION_OF_CATALYTIC_ACTIVITY	183	-0.429631	-1.17451	0.172165	0.74568	1	1077	tags=17%, list=10%, signal=18%
TRANSMEMBRANE_RECEPTOR_PROTEIN_TYROSINE_KINASE_SIGNALING_PATHWAY	44	-0.486632	-1.16074	0.265207	0.796644	1	2011	tags=30%, list=18%, signal=36%
BIOSYNTHETIC_PROCESS	324	-0.418998	-1.1605	0.104251	0.790501	1	1918	tags=17%, list=17%, signal=20%
REGULATION_OF_KINASE_ACTIVITY	116	-0.435877	-1.15964	0.201501	0.786865	1	751	tags=16%, list=7%, signal=16%
NEGATIVE_REGULATION_OF_APOPTOSIS	102	-0.440901	-1.15922	0.228415	0.781766	1	1183	tags=14%, list=11%, signal=15%
RESPONSE_TO_RADIATION	38	-0.485225	-1.1534	0.288413	0.79884	1	1245	tags=13%, list=11%, signal=15%
NITROGEN_COMPOUND_BIOSYNTHETIC_PROCESS	21	-0.531087	-1.15218	0.314248	0.796864	1	1773	tags=38%, list=16%, signal=45%
REPRODUCTIVE_PROCESS	57	-0.461158	-1.14857	0.272727	0.80506	1	2081	tags=23%, list=19%, signal=28%
LIPID_BIOSYNTHETIC_PROCESS	65	-0.455664	-1.14811	0.267202	0.800102	1	2451	tags=25%, list=22%, signal=31%
TRANSCRIPTION_INITIATION_FROM_RNA_POLYMERASE_II_PROMOTER	29	-0.514674	-1.14695	0.296875	0.79798	1	1143	tags=17%, list=10%, signal=19%
RESPONSE_TO_UV	17	-0.547889	-1.14646	0.319629	0.793146	1	731	tags=12%, list=7%, signal=13%
REGULATION_OF_PROTEIN_KINASE_ACTIVITY	114	-0.437928	-1.14462	0.236501	0.793488	1	751	tags=16%, list=7%, signal=17%
MITOTIC_SISTER_CHROMATID_SEGREGATION	15	-0.556887	-1.1426	0.324438	0.794975	1	2749	tags=33%, list=25%, signal=44%
MEMBRANE_LIPID_METABOLIC_PROCESS	67	-0.443068	-1.13222	0.274397	0.829858	1	1907	tags=24%, list=17%, signal=29%
REGULATION_OF_TRANSFERASE_ACTIVITY	119	-0.42456	-1.13095	0.267306	0.828229	1	751	tags=15%, list=7%, signal=16%
ANTI_APOPTOSIS	84	-0.434951	-1.12812	0.269912	0.832695	1	1164	tags=13%, list=11%, signal=15%
REGULATION_OF_BIOLOGICAL_QUALITY	204	-0.409009	-1.12724	0.224261	0.829651	1	1353	tags=14%, list=12%, signal=15%
MEMBRANE_ORGANIZATION_AND_BIOGENESIS	88	-0.433046	-1.12232	0.290533	0.843456	1	884	tags=14%, list=8%, signal=15%
DEFENSE_RESPONSE	66	-0.442738	-1.12055	0.307868	0.843713	1	1091	tags=15%, list=10%, signal=17%
CARBOHYDRATE_BIOSYNTHETIC_PROCESS	35	-0.47706	-1.12008	0.333333	0.838993	1	1370	tags=17%, list=12%, signal=20%
REGULATION_OF_MOLECULAR_FUNCTION	214	-0.41006	-1.11678	0.230691	0.845597	1	1077	tags=15%, list=10%, signal=16%
AROMATIC_COMPOUND_METABOLIC_PROCESS	17	-0.531137	-1.11284	0.370057	0.855534	1	1668	tags=24%, list=15%, signal=28%
REPRODUCTION	97	-0.424562	-1.11189	0.311804	0.852881	1	2110	tags=22%, list=19%, signal=27%
HEART_DEVELOPMENT	20	-0.518797	-1.10807	0.358311	0.861113	1	1296	tags=40%, list=12%, signal=45%
COENZYME_METABOLIC_PROCESS	28	-0.497993	-1.10804	0.35533	0.854708	1	1266	tags=14%, list=11%, signal=16%
PROTEIN_DNA_COMPLEX_ASSEMBLY	48	-0.462152	-1.10521	0.35468	0.860319	1	1974	tags=19%, list=18%, signal=23%
TRANSCRIPTION_INITIATION	35	-0.473286	-1.10028	0.359756	0.873182	1	1433	tags=17%, list=13%, signal=20%
LOCOMOTORY_BEHAVIOR	22	-0.510453	-1.09942	0.366712	0.8705	1	1088	tags=23%, list=10%, signal=25%
REGULATION_OF_PROGRAMMED_CELL_DEATH	226	-0.392837	-1.09064	0.292089	0.89876	1	1245	tags=12%, list=11%, signal=14%
POSITIVE_REGULATION_OF_HYDROLASE_ACTIVITY	28	-0.488512	-1.08929	0.385787	0.89772	1	1920	tags=29%, list=17%, signal=34%
CHROMATIN_ASSEMBLY_OR_DISASSEMBLY	25	-0.484899	-1.08156	0.368999	0.922051	1	3676	tags=52%, list=33%, signal=78%
MACROMOLECULE_BIOSYNTHETIC_PROCESS	220	-0.391107	-1.07739	0.318413	0.932409	1	1918	tags=16%, list=17%, signal=19%
SECRETION	96	-0.412966	-1.07734	0.342134	0.925918	1	1347	tags=13%, list=12%, signal=14%
TRANSCRIPTION_FROM_RNA_POLYMERASE_II_PROMOTER	363	-0.385821	-1.07677	0.284137	0.921624	1	1441	tags=14%, list=13%, signal=16%
CELL_DEVELOPMENT	360	-0.386609	-1.07438	0.300903	0.924987	1	1398	tags=13%, list=13%, signal=14%
SEXUAL_REPRODUCTION	51	-0.44081	-1.07292	0.376202	0.924436	1	1901	tags=22%, list=17%, signal=26%
DNA_PACKAGING	28	-0.46842	-1.06492	0.40617	0.949592	1	3304	tags=32%, list=30%, signal=46%
ACTIN_POLYMERIZATION_AND_OR_DEPOLYMERIZATION	17	-0.504332	-1.06064	0.436441	0.960329	1	1390	tags=12%, list=13%, signal=13%
REGULATION_OF_APOPTOSIS	225	-0.385154	-1.06039	0.35461	0.954688	1	1245	tags=12%, list=11%, signal=13%
POSITIVE_REGULATION_OF_BIOLOGICAL_PROCESS	424	-0.379035	-1.06034	0.316316	0.94832	1	1661	tags=16%, list=15%, signal=18%
SISTER_CHROMATID_SEGREGATION	16	-0.521587	-1.05598	0.42068	0.958567	1	2749	tags=31%, list=25%, signal=42%
REGULATION_OF_DEVELOPMENTAL_PROCESS	280	-0.384241	-1.05567	0.359233	0.953363	1	1398	tags=14%, list=13%, signal=16%
POSITIVE_REGULATION_OF_DEVELOPMENTAL_PROCESS	135	-0.395534	-1.05487	0.378947	0.95015	1	1245	tags=13%, list=11%, signal=14%
MONOCARBOXYLIC_ACID_METABOLIC_PROCESS	43	-0.436712	-1.04686	0.421875	0.974024	1	977	tags=14%, list=9%, signal=15%
CARBOHYDRATE_METABOLIC_PROCESS	117	-0.391362	-1.04633	0.404968	0.969698	1	1601	tags=17%, list=14%, signal=20%
TRANSCRIPTION_DNA_DEPENDENT	492	-0.372607	-1.04597	0.346346	0.964818	1	2123	tags=18%, list=19%, signal=22%
REGULATION_OF_TRANSCRIPTIONDNA_DEPENDENT	349	-0.376575	-1.04588	0.377644	0.958958	1	1935	tags=17%, list=17%, signal=20%
REGULATION_OF_TRANSCRIPTION_FROM_RNA_POLYMERASE_II_PROMOTER	228	-0.380991	-1.04419	0.385238	0.959104	1	1583	tags=15%, list=14%, signal=17%
RNA_BIOSYNTHETIC_PROCESS	494	-0.371658	-1.0397	0.379	0.969426	1	2123	tags=18%, list=19%, signal=22%
PROGRAMMED_CELL_DEATH	284	-0.376619	-1.0379	0.390342	0.970024	1	1398	tags=13%, list=13%, signal=15%
REGULATION_OF_CELLULAR_COMPONENT_ORGANIZATION_AND_BIOGENESIS	97	-0.392706	-1.03696	0.423286	0.967401	1	1183	tags=11%, list=11%, signal=13%
ACTIN_FILAMENT_ORGANIZATION	17	-0.490576	-1.03606	0.422343	0.964632	1	2056	tags=35%, list=19%, signal=43%
DNA_INTEGRITY_CHECKPOINT	21	-0.486322	-1.03598	0.457143	0.958851	1	3873	tags=62%, list=35%, signal=95%
APOPTOSIS_GO	283	-0.370449	-1.03275	0.41994	0.964521	1	1398	tags=13%, list=13%, signal=14%
SENSORY_PERCEPTION	61	-0.411067	-1.03187	0.441379	0.96167	1	1524	tags=18%, list=14%, signal=21%
REGULATION_OF_RNA_METABOLIC_PROCESS	356	-0.3688	-1.0315	0.427856	0.957058	1	1935	tags=17%, list=17%, signal=19%
RESPONSE_TO_ORGANIC_SUBSTANCE	17	-0.494867	-1.03084	0.478082	0.953703	1	963	tags=12%, list=9%, signal=13%
POSITIVE_REGULATION_OF_CELLULAR_PROCESS	412	-0.369757	-1.03024	0.415415	0.950052	1	1661	tags=16%, list=15%, signal=18%
SECRETION_BY_CELL	79	-0.397673	-1.02131	0.445444	0.97606	1	1347	tags=13%, list=12%, signal=14%
MITOCHONDRIAL_TRANSPORT	21	-0.481697	-1.02027	0.460106	0.974032	1	2737	tags=33%, list=25%, signal=44%
MICROTUBULE_BASED_PROCESS	75	-0.393757	-1.01846	0.45852	0.974395	1	1347	tags=11%, list=12%, signal=12%
CHROMOSOME_ORGANIZATION_AND_BIOGENESIS	109	-0.384854	-1.01785	0.464208	0.970799	1	3398	tags=34%, list=31%, signal=48%
RESPONSE_TO_OXIDATIVE_STRESS	36	-0.43979	-1.01689	0.472705	0.968512	1	1689	tags=19%, list=15%, signal=23%
RESPONSE_TO_ABIOTIC_STIMULUS	56	-0.408809	-1.00862	0.467857	0.991276	1	1245	tags=11%, list=11%, signal=12%
LIPID_METABOLIC_PROCESS	180	-0.369255	-1.00349	0.490702	1	1	1583	tags=19%, list=14%, signal=22%
REGULATION_OF_CELLULAR_PROTEIN_METABOLIC_PROCESS	93	-0.384209	-1.00309	0.489011	0.998784	1	1834	tags=15%, list=17%, signal=18%
REGULATION_OF_TRANSCRIPTION	426	-0.3557	-1.00124	0.504008	0.999494	1	1902	tags=16%, list=17%, signal=19%
MEIOTIC_CELL_CYCLE	23	-0.461882	-1.00066	0.501333	0.99566	1	846	tags=9%, list=8%, signal=9%
CYTOSKELETON_ORGANIZATION_AND_BIOGENESIS	160	-0.367604	-0.997188	0.513486	1	1	1458	tags=12%, list=13%, signal=13%
ACTIN_CYTOSKELETON_ORGANIZATION_AND_BIOGENESIS	75	-0.387245	-0.993087	0.5	1	1	2056	tags=20%, list=19%, signal=24%
RESPONSE_TO_EXTERNAL_STIMULUS	99	-0.384364	-0.99289	0.494054	1	1	1123	tags=19%, list=10%, signal=21%
ACTIVATION_OF_PROTEIN_KINASE_ACTIVITY	19	-0.466092	-0.992518	0.504814	1	1	1765	tags=32%, list=16%, signal=38%
LIPID_CATABOLIC_PROCESS	21	-0.463388	-0.991726	0.506427	0.997606	1	2558	tags=38%, list=23%, signal=49%
CELLULAR_LIPID_CATABOLIC_PROCESS	20	-0.466379	-0.991313	0.504801	0.99333	1	2558	tags=40%, list=23%, signal=52%
REGULATION_OF_PROTEIN_METABOLIC_PROCESS	100	-0.37491	-0.987927	0.509956	0.99904	1	1844	tags=15%, list=17%, signal=18%
NEGATIVE_REGULATION_OF_TRANSCRIPTION_FROM_RNA_POLYMERASE_II_PROMOTER	63	-0.395741	-0.987386	0.522936	0.995271	1	1896	tags=22%, list=17%, signal=27%
REGULATION_OF_DNA_REPLICATION	17	-0.479775	-0.987331	0.517192	0.990086	1	3621	tags=53%, list=33%, signal=79%
CELLULAR_LIPID_METABOLIC_PROCESS	142	-0.366903	-0.986716	0.529473	0.986759	1	1558	tags=18%, list=14%, signal=21%
CELLULAR_BIOSYNTHETIC_PROCESS	219	-0.3584	-0.985086	0.531504	0.98638	1	2268	tags=16%, list=20%, signal=20%
ORGANELLE_ORGANIZATION_AND_BIOGENESIS	394	-0.351418	-0.983778	0.580321	0.985245	1	2498	tags=19%, list=23%, signal=24%
GAMETE_GENERATION	46	-0.404959	-0.982954	0.519435	0.982528	1	2110	tags=20%, list=19%, signal=24%
REGULATION_OF_PROTEIN_MODIFICATION_PROCESS	25	-0.440956	-0.979441	0.520997	0.98793	1	369	tags=8%, list=3%, signal=8%
CELLULAR_PROTEIN_COMPLEX_ASSEMBLY	22	-0.451429	-0.977481	0.527705	0.988788	1	1534	tags=14%, list=14%, signal=16%
VESICLE_MEDIATED_TRANSPORT	144	-0.365092	-0.977294	0.539432	0.984179	1	2012	tags=20%, list=18%, signal=24%
REGULATION_OF_GENE_EXPRESSION	486	-0.352927	-0.977006	0.582	0.979938	1	1902	tags=16%, list=17%, signal=18%
SECRETORY_PATHWAY	66	-0.383148	-0.974696	0.513889	0.982129	1	1347	tags=12%, list=12%, signal=14%
TRANSPORT	481	-0.349302	-0.973024	0.59679	0.98194	1	2160	tags=18%, list=20%, signal=21%
DNA_RECOMBINATION	35	-0.418954	-0.972328	0.528536	0.979023	1	74	tags=3%, list=1%, signal=3%
GENERATION_OF_NEURONS	46	-0.403136	-0.963495	0.534856	1	1	1616	tags=22%, list=15%, signal=25%
SECONDARY_METABOLIC_PROCESS	17	-0.462876	-0.961322	0.530387	1	1	1534	tags=18%, list=14%, signal=20%
COFACTOR_BIOSYNTHETIC_PROCESS	20	-0.45036	-0.960739	0.536486	0.997914	1	1534	tags=25%, list=14%, signal=29%
RESPONSE_TO_CHEMICAL_STIMULUS	154	-0.354164	-0.959197	0.590814	0.997666	1	1147	tags=14%, list=10%, signal=16%
REGULATION_OF_DNA_METABOLIC_PROCESS	36	-0.407078	-0.95827	0.538841	0.995329	1	3621	tags=44%, list=33%, signal=66%
REGULATION_OF_NUCLEOBASENUCLEOSIDENUCLEOTIDE_AND_NUCLEIC_ACID_METABOLIC_PROCESS	466	-0.34375	-0.95656	0.654655	0.995281	1	2156	tags=18%, list=19%, signal=21%
REGULATION_OF_TRANSLATION	48	-0.386348	-0.944216	0.565371	1	1	1834	tags=15%, list=17%, signal=17%
VIRAL_REPRODUCTIVE_PROCESS	21	-0.436206	-0.94419	0.55291	1	1	2381	tags=24%, list=21%, signal=30%
ACTIN_FILAMENT_BASED_PROCESS	80	-0.369737	-0.941454	0.608454	1	1	2056	tags=19%, list=19%, signal=23%
NEUROGENESIS	55	-0.380781	-0.940562	0.594238	1	1	1616	tags=18%, list=15%, signal=21%
REGULATION_OF_SIGNAL_TRANSDUCTION	140	-0.350395	-0.937437	0.617155	1	1	1882	tags=23%, list=17%, signal=27%
LIPOPROTEIN_METABOLIC_PROCESS	22	-0.434037	-0.936873	0.587601	1	1	2358	tags=32%, list=21%, signal=40%
DNA_DAMAGE_CHECKPOINT	17	-0.454711	-0.935505	0.571027	1	1	3047	tags=41%, list=28%, signal=57%
NUCLEOBASENUCLEOSIDENUCLEOTIDE_AND_NUCLEIC_ACID_TRANSPORT	21	-0.437304	-0.92742	0.600519	1	1	259	tags=5%, list=2%, signal=5%
CHROMOSOME_SEGREGATION	31	-0.412736	-0.926475	0.599499	1	1	2749	tags=29%, list=25%, signal=39%
INDUCTION_OF_APOPTOSIS_BY_INTRACELLULAR_SIGNALS	17	-0.443111	-0.920592	0.613889	1	1	4018	tags=65%, list=36%, signal=101%
NEGATIVE_REGULATION_OF_RNA_METABOLIC_PROCESS	102	-0.352914	-0.913633	0.686891	1	1	3217	tags=38%, list=29%, signal=53%
DNA_DEPENDENT_DNA_REPLICATION	48	-0.374595	-0.911933	0.62065	1	1	3982	tags=52%, list=36%, signal=81%
ALCOHOL_METABOLIC_PROCESS	56	-0.365506	-0.911253	0.624706	1	1	1340	tags=16%, list=12%, signal=18%
WOUND_HEALING	16	-0.441999	-0.909882	0.611582	1	1	1088	tags=19%, list=10%, signal=21%
NEGATIVE_REGULATION_OF_TRANSCRIPTION	148	-0.338251	-0.908997	0.695288	1	1	2156	tags=21%, list=19%, signal=26%
POSITIVE_REGULATION_OF_SIGNAL_TRANSDUCTION	80	-0.351344	-0.907346	0.643333	1	1	1033	tags=14%, list=9%, signal=15%
NEGATIVE_REGULATION_OF_TRANSCRIPTION_DNA_DEPENDENT	101	-0.350863	-0.907046	0.668118	1	1	3217	tags=38%, list=29%, signal=53%
DEPHOSPHORYLATION	49	-0.371876	-0.90655	0.624096	1	1	1126	tags=12%, list=10%, signal=14%
NEGATIVE_REGULATION_OF_TRANSFERASE_ACTIVITY	25	-0.40662	-0.903971	0.614987	1	1	1077	tags=20%, list=10%, signal=22%
ESTABLISHMENT_OF_PROTEIN_LOCALIZATION	146	-0.335382	-0.903889	0.688284	1	1	2790	tags=23%, list=25%, signal=31%
ESTABLISHMENT_AND_OR_MAINTENANCE_OF_CHROMATIN_ARCHITECTURE	68	-0.363407	-0.90303	0.628796	1	1	3398	tags=37%, list=31%, signal=53%
SMALL_GTPASE_MEDIATED_SIGNAL_TRANSDUCTION	56	-0.363513	-0.896139	0.64455	1	1	1882	tags=23%, list=17%, signal=28%
MITOCHONDRION_ORGANIZATION_AND_BIOGENESIS	44	-0.378597	-0.894774	0.646919	1	1	3840	tags=50%, list=35%, signal=76%
NEGATIVE_REGULATION_OF_NUCLEOBASENUCLEOSIDENUCLEOTIDE_AND_NUCLEIC_ACID_METABOLIC_PROCESS	166	-0.328644	-0.892484	0.697436	1	1	2156	tags=20%, list=19%, signal=25%
CYTOKINE_PRODUCTION	20	-0.419416	-0.887268	0.649585	1	1	1834	tags=30%, list=17%, signal=36%
GROWTH	46	-0.364111	-0.881516	0.646501	1	1	1757	tags=22%, list=16%, signal=26%
REGULATION_OF_CELL_GROWTH	33	-0.376496	-0.881508	0.65878	1	1	2284	tags=30%, list=21%, signal=38%
CASPASE_ACTIVATION	17	-0.427421	-0.878265	0.648844	1	1	894	tags=12%, list=8%, signal=13%
POSITIVE_REGULATION_OF_CASPASE_ACTIVITY	19	-0.412972	-0.877035	0.648611	1	1	2284	tags=26%, list=21%, signal=33%
CELLULAR_COMPONENT_ASSEMBLY	232	-0.316458	-0.870182	0.775304	1	1	1844	tags=13%, list=17%, signal=15%
REGULATION_OF_CELL_DIFFERENTIATION	29	-0.384815	-0.869411	0.688586	1	1	1347	tags=21%, list=12%, signal=23%
PROTEIN_LOCALIZATION	164	-0.318443	-0.866573	0.773624	1	1	2790	tags=23%, list=25%, signal=30%
NEGATIVE_REGULATION_OF_CATALYTIC_ACTIVITY	43	-0.36124	-0.866332	0.661939	1	1	1077	tags=14%, list=10%, signal=15%
PROTEIN_TARGETING	95	-0.332424	-0.861131	0.729348	1	1	2790	tags=23%, list=25%, signal=31%
POSITIVE_REGULATION_OF_PROTEIN_MODIFICATION_PROCESS	15	-0.43182	-0.861046	0.672154	1	1	2621	tags=27%, list=24%, signal=35%
AXON_GUIDANCE	16	-0.42126	-0.858828	0.675035	1	1	1616	tags=25%, list=15%, signal=29%
VIRAL_REPRODUCTION	24	-0.387937	-0.856576	0.677852	1	1	2949	tags=29%, list=27%, signal=40%
PROTEIN_COMPLEX_ASSEMBLY	118	-0.323132	-0.855233	0.750535	1	1	2379	tags=19%, list=21%, signal=25%
NEURON_DIFFERENTIATION	42	-0.356508	-0.855131	0.699513	1	1	1616	tags=21%, list=15%, signal=25%
GLYCEROPHOSPHOLIPID_BIOSYNTHETIC_PROCESS	24	-0.385194	-0.852173	0.692828	1	1	1907	tags=21%, list=17%, signal=25%
REGULATION_OF_GROWTH	38	-0.356567	-0.847471	0.704208	1	1	2541	tags=32%, list=23%, signal=41%
VIRAL_INFECTIOUS_CYCLE	18	-0.401392	-0.84247	0.677596	1	1	2949	tags=28%, list=27%, signal=38%
PROTEIN_AMINO_ACID_O_LINKED_GLYCOSYLATION	15	-0.412745	-0.840521	0.691011	1	1	2383	tags=33%, list=22%, signal=42%
CHROMATIN_ASSEMBLY	15	-0.411178	-0.839665	0.681883	1	1	3676	tags=47%, list=33%, signal=70%
BIOPOLYMER_CATABOLIC_PROCESS	99	-0.319219	-0.839615	0.75431	1	1	2505	tags=14%, list=23%, signal=18%
NEGATIVE_REGULATION_OF_CELLULAR_PROTEIN_METABOLIC_PROCESS	25	-0.378779	-0.83876	0.706117	1	1	1086	tags=12%, list=10%, signal=13%
MACROMOLECULAR_COMPLEX_ASSEMBLY	221	-0.303501	-0.838151	0.829442	1	1	1844	tags=12%, list=17%, signal=14%
PHOSPHOLIPID_BIOSYNTHETIC_PROCESS	32	-0.363639	-0.837117	0.719018	1	1	1907	tags=19%, list=17%, signal=23%
PROTEIN_TRANSPORT	131	-0.31431	-0.836566	0.780893	1	1	2790	tags=23%, list=25%, signal=30%
DOUBLE_STRAND_BREAK_REPAIR	22	-0.387842	-0.832924	0.719041	1	1	3401	tags=41%, list=31%, signal=59%
INTRACELLULAR_PROTEIN_TRANSPORT	123	-0.311493	-0.832333	0.798742	1	1	2790	tags=22%, list=25%, signal=29%
CELL_PROLIFERATION_GO_0008283	278	-0.29835	-0.823732	0.882946	1	1	1237	tags=10%, list=11%, signal=11%
PROTEIN_AMINO_ACID_DEPHOSPHORYLATION	43	-0.33993	-0.823477	0.737665	1	1	1126	tags=12%, list=10%, signal=13%
PROTEIN_OLIGOMERIZATION	28	-0.365809	-0.817649	0.706874	1	1	2108	tags=21%, list=19%, signal=26%
NEGATIVE_REGULATION_OF_PROTEIN_METABOLIC_PROCESS	27	-0.364812	-0.816821	0.711712	1	1	1086	tags=11%, list=10%, signal=12%
PROTEIN_IMPORT_INTO_NUCLEUS	39	-0.338427	-0.814295	0.753374	1	1	2152	tags=18%, list=19%, signal=22%
MACROMOLECULE_LOCALIZATION	181	-0.298074	-0.81055	0.861111	1	1	2737	tags=20%, list=25%, signal=26%
MACROMOLECULE_CATABOLIC_PROCESS	110	-0.302278	-0.806589	0.831715	1	1	2505	tags=14%, list=23%, signal=17%
NEURON_DEVELOPMENT	35	-0.347683	-0.806405	0.759305	1	1	1616	tags=20%, list=15%, signal=23%
CELL_SUBSTRATE_ADHESION	19	-0.377692	-0.805859	0.731183	1	1	476	tags=11%, list=4%, signal=11%
PEPTIDYL_AMINO_ACID_MODIFICATION	45	-0.329723	-0.800877	0.777257	1	1	369	tags=4%, list=3%, signal=5%
PROTEIN_MODIFICATION_PROCESS	451	-0.285206	-0.795865	0.966834	1	1	1923	tags=16%, list=17%, signal=19%
NEGATIVE_REGULATION_OF_BIOLOGICAL_PROCESS	447	-0.283208	-0.795024	0.942943	1	1	1441	tags=13%, list=13%, signal=14%
RESPONSE_TO_HORMONE_STIMULUS	23	-0.368056	-0.793836	0.757009	1	1	963	tags=9%, list=9%, signal=10%
CELL_MATRIX_ADHESION	19	-0.377692	-0.784281	0.77591	1	1	476	tags=11%, list=4%, signal=11%
NITROGEN_COMPOUND_METABOLIC_PROCESS	102	-0.299775	-0.784053	0.847328	1	1	2627	tags=26%, list=24%, signal=34%
CELLULAR_CATABOLIC_PROCESS	156	-0.286302	-0.783349	0.864529	1	1	2558	tags=17%, list=23%, signal=22%
PROTEIN_HOMOOLIGOMERIZATION	15	-0.381965	-0.77833	0.755274	1	1	3700	tags=33%, list=33%, signal=50%
LIPOPROTEIN_BIOSYNTHETIC_PROCESS	19	-0.361742	-0.777517	0.761155	1	1	2358	tags=26%, list=21%, signal=33%
NUCLEAR_IMPORT	41	-0.326553	-0.777213	0.814446	1	1	2152	tags=17%, list=19%, signal=21%
REGULATION_OF_GENE_EXPRESSION_EPIGENETIC	25	-0.351922	-0.775641	0.778497	1	1	3805	tags=52%, list=34%, signal=79%
BIOPOLYMER_MODIFICATION	467	-0.277155	-0.775223	0.975928	1	1	1923	tags=16%, list=17%, signal=18%
PROTEIN_AMINO_ACID_LIPIDATION	19	-0.361742	-0.770205	0.783333	1	1	2358	tags=26%, list=21%, signal=33%
REGULATION_OF_HYDROLASE_ACTIVITY	44	-0.322285	-0.767445	0.812274	1	1	1223	tags=14%, list=11%, signal=15%
DNA_REPLICATION_INITIATION	15	-0.379399	-0.762281	0.784792	1	1	3740	tags=67%, list=34%, signal=101%
CELLULAR_LOCALIZATION	285	-0.273471	-0.761564	0.950555	1	1	2383	tags=15%, list=22%, signal=19%
CHROMATIN_MODIFICATION	49	-0.312046	-0.760544	0.819692	1	1	3558	tags=41%, list=32%, signal=60%
DNA_METABOLIC_PROCESS	214	-0.276572	-0.759019	0.915306	1	1	3409	tags=30%, list=31%, signal=42%
PHOSPHOLIPID_METABOLIC_PROCESS	48	-0.30724	-0.758332	0.81464	1	1	2059	tags=19%, list=19%, signal=23%
CARBOXYLIC_ACID_METABOLIC_PROCESS	108	-0.28957	-0.757216	0.874329	1	1	2580	tags=24%, list=23%, signal=31%
NEGATIVE_REGULATION_OF_CELLULAR_PROCESS	435	-0.270502	-0.756777	0.968907	1	1	1441	tags=12%, list=13%, signal=13%
CELL_DIVISION	18	-0.355845	-0.756622	0.783673	1	1	3087	tags=39%, list=28%, signal=54%
CELL_PROJECTION_BIOGENESIS	18	-0.359601	-0.756428	0.766017	1	1	996	tags=17%, list=9%, signal=18%
TRANSLATION	122	-0.283288	-0.753618	0.889357	1	1	2580	tags=13%, list=23%, signal=17%
CATABOLIC_PROCESS	164	-0.278586	-0.753343	0.922917	1	1	2558	tags=17%, list=23%, signal=22%
ESTABLISHMENT_OF_CELLULAR_LOCALIZATION	276	-0.27075	-0.747014	0.9556	1	1	2383	tags=16%, list=22%, signal=19%
MEMBRANE_FUSION	19	-0.344767	-0.745962	0.793829	1	1	884	tags=11%, list=8%, signal=11%
MICROTUBULE_BASED_MOVEMENT	15	-0.360021	-0.744468	0.793741	1	1	577	tags=7%, list=5%, signal=7%
NEGATIVE_REGULATION_OF_METABOLIC_PROCESS	196	-0.271466	-0.744416	0.936345	1	1	2156	tags=20%, list=19%, signal=24%
NEGATIVE_REGULATION_OF_CELLULAR_METABOLIC_PROCESS	195	-0.272046	-0.743584	0.935451	1	1	2156	tags=20%, list=19%, signal=24%
CHROMATIN_REMODELING	23	-0.342017	-0.743426	0.815621	1	1	3558	tags=39%, list=32%, signal=58%
RAS_PROTEIN_SIGNAL_TRANSDUCTION	39	-0.315918	-0.742384	0.852868	1	1	1882	tags=21%, list=17%, signal=25%
ER_TO_GOLGI_VESICLE_MEDIATED_TRANSPORT	18	-0.355275	-0.736817	0.803213	1	1	3945	tags=56%, list=36%, signal=86%
DNA_DAMAGE_RESPONSESIGNAL_TRANSDUCTION	26	-0.327921	-0.729971	0.831169	1	1	3922	tags=50%, list=35%, signal=77%
ORGANIC_ACID_METABOLIC_PROCESS	110	-0.276021	-0.726966	0.916756	1	1	2580	tags=25%, list=23%, signal=32%
REGULATION_OF_BINDING	37	-0.309652	-0.725848	0.850856	1	1	3305	tags=32%, list=30%, signal=46%
CELLULAR_CARBOHYDRATE_METABOLIC_PROCESS	84	-0.281701	-0.721106	0.889746	1	1	1724	tags=14%, list=16%, signal=17%
PROTEIN_IMPORT	53	-0.289623	-0.72064	0.897006	1	1	2458	tags=21%, list=22%, signal=27%
INFLAMMATORY_RESPONSE	36	-0.309138	-0.717162	0.854454	1	1	2026	tags=28%, list=18%, signal=34%
PROTEOLYSIS	120	-0.266762	-0.710912	0.932131	1	1	1614	tags=12%, list=15%, signal=14%
NEGATIVE_REGULATION_OF_GROWTH	31	-0.312995	-0.708692	0.877604	1	1	2541	tags=32%, list=23%, signal=42%
REGULATION_OF_BODY_FLUID_LEVELS	16	-0.34511	-0.706949	0.834758	1	1	984	tags=13%, list=9%, signal=14%
NEURITE_DEVELOPMENT	32	-0.306336	-0.70524	0.867089	1	1	1616	tags=16%, list=15%, signal=18%
NEGATIVE_REGULATION_OF_DNA_METABOLIC_PROCESS	17	-0.334767	-0.700442	0.841379	1	1	3621	tags=41%, list=33%, signal=61%
HEMOPOIETIC_OR_LYMPHOID_ORGAN_DEVELOPMENT	34	-0.305	-0.700318	0.892405	1	1	1184	tags=12%, list=11%, signal=13%
AXONOGENESIS	26	-0.315397	-0.694534	0.84802	1	1	537	tags=8%, list=5%, signal=8%
NEGATIVE_REGULATION_OF_BINDING	15	-0.337312	-0.692239	0.855944	1	1	2284	tags=33%, list=21%, signal=42%
RIBOSOME_BIOGENESIS_AND_ASSEMBLY	16	-0.335734	-0.691182	0.84691	1	1	5634	tags=81%, list=51%, signal=165%
IMMUNE_SYSTEM_DEVELOPMENT	36	-0.292766	-0.690822	0.9022	1	1	1184	tags=11%, list=11%, signal=12%
REGULATION_OF_DNA_BINDING	29	-0.298768	-0.670605	0.89384	1	1	3305	tags=38%, list=30%, signal=54%
CELL_CYCLE_PHASE	138	-0.246548	-0.670366	0.971875	1	1	2586	tags=21%, list=23%, signal=27%
ER_NUCLEAR_SIGNALING_PATHWAY	15	-0.32612	-0.668131	0.862606	1	1	735	tags=13%, list=7%, signal=14%
REGULATION_OF_SMALL_GTPASE_MEDIATED_SIGNAL_TRANSDUCTION	15	-0.324293	-0.663835	0.870605	1	1	2493	tags=33%, list=23%, signal=43%
PHOSPHOINOSITIDE_BIOSYNTHETIC_PROCESS	21	-0.305136	-0.662207	0.891391	1	1	2358	tags=24%, list=21%, signal=30%
CELLULAR_MORPHOGENESIS_DURING_DIFFERENTIATION	31	-0.291093	-0.66173	0.908387	1	1	537	tags=6%, list=5%, signal=7%
LIPID_TRANSPORT	16	-0.318023	-0.652153	0.898571	1	1	1543	tags=19%, list=14%, signal=22%
POSITIVE_REGULATION_OF_CELLULAR_COMPONENT_ORGANIZATION_AND_BIOGENESIS	24	-0.289869	-0.650291	0.900383	1	1	1925	tags=21%, list=17%, signal=25%
CYTOKINESIS	16	-0.309685	-0.648296	0.87106	1	1	3087	tags=38%, list=28%, signal=52%
PROTEIN_FOLDING	53	-0.265031	-0.647435	0.929398	1	1	3636	tags=34%, list=33%, signal=50%
HEMOPOIESIS	33	-0.272391	-0.638016	0.929114	1	1	1091	tags=9%, list=10%, signal=10%
POSITIVE_REGULATION_OF_CELLULAR_PROTEIN_METABOLIC_PROCESS	31	-0.272493	-0.634774	0.925258	1	1	3361	tags=32%, list=30%, signal=46%
CELL_CYCLE_PROCESS	161	-0.234418	-0.631822	0.992857	1	1	3785	tags=39%, list=34%, signal=59%
POSITIVE_REGULATION_OF_PROTEIN_METABOLIC_PROCESS	32	-0.269615	-0.625895	0.921419	1	1	3361	tags=31%, list=30%, signal=45%
AMINE_METABOLIC_PROCESS	89	-0.239011	-0.621711	0.98259	1	1	2627	tags=22%, list=24%, signal=29%
NUCLEOCYTOPLASMIC_TRANSPORT	74	-0.241179	-0.618335	0.970012	1	1	2152	tags=14%, list=19%, signal=17%
PEPTIDYL_TYROSINE_MODIFICATION	15	-0.299983	-0.605235	0.909091	1	1	369	tags=7%, list=3%, signal=7%
NUCLEAR_TRANSPORT	75	-0.234652	-0.601096	0.979753	1	1	2152	tags=13%, list=19%, signal=16%
GLYCEROPHOSPHOLIPID_METABOLIC_PROCESS	32	-0.262363	-0.600256	0.9475	1	1	1907	tags=16%, list=17%, signal=19%
RESPONSE_TO_HYPOXIA	20	-0.287792	-0.597724	0.932341	1	1	1088	tags=15%, list=10%, signal=17%
REGULATION_OF_PROTEIN_STABILITY	16	-0.28736	-0.588797	0.951965	1	1	3290	tags=44%, list=30%, signal=62%
INTRACELLULAR_TRANSPORT	237	-0.214176	-0.586715	0.998986	1	1	2383	tags=15%, list=22%, signal=18%
HETEROCYCLE_METABOLIC_PROCESS	20	-0.270642	-0.575989	0.938585	1	1	1534	tags=10%, list=14%, signal=12%
RESPONSE_TO_STRESS	311	-0.207517	-0.573243	1	1	1	2677	tags=21%, list=24%, signal=26%
RNA_SPLICING	86	-0.222611	-0.570186	0.991209	1	1	4225	tags=31%, list=38%, signal=50%
G1_S_TRANSITION_OF_MITOTIC_CELL_CYCLE	24	-0.257467	-0.569405	0.952894	1	1	3247	tags=42%, list=29%, signal=59%
DNA_REPLICATION	86	-0.220259	-0.564331	0.988999	1	1	3982	tags=44%, list=36%, signal=68%
RNA_PROCESSING	159	-0.20214	-0.547861	1	1	1	4292	tags=34%, list=39%, signal=55%
COVALENT_CHROMATIN_MODIFICATION	21	-0.255183	-0.546332	0.969456	1	1	3398	tags=48%, list=31%, signal=69%
POSITIVE_REGULATION_OF_IMMUNE_SYSTEM_PROCESS	17	-0.255432	-0.525387	0.955163	1	1	1432	tags=12%, list=13%, signal=13%
GLUCOSE_METABOLIC_PROCESS	20	-0.244548	-0.51623	0.969251	1	1	559	tags=5%, list=5%, signal=5%
REGULATION_OF_MITOTIC_CELL_CYCLE	17	-0.250203	-0.512139	0.97305	1	1	3587	tags=41%, list=32%, signal=61%
CYTOSKELETON_DEPENDENT_INTRACELLULAR_TRANSPORT	21	-0.236925	-0.511533	0.978231	1	1	577	tags=5%, list=5%, signal=5%
MAINTENANCE_OF_LOCALIZATION	15	-0.245714	-0.503899	0.967236	1	1	702	tags=7%, list=6%, signal=7%
RNA_SPLICINGVIA_TRANSESTERIFICATION_REACTIONS	33	-0.218585	-0.502317	0.984674	1	1	4225	tags=36%, list=38%, signal=59%
MRNA_METABOLIC_PROCESS	76	-0.194442	-0.494378	1	1	1	4318	tags=34%, list=39%, signal=56%
PHOSPHOINOSITIDE_METABOLIC_PROCESS	26	-0.22262	-0.49052	0.984791	1	1	2358	tags=19%, list=21%, signal=24%
HISTONE_MODIFICATION	20	-0.233052	-0.489802	0.974185	1	1	3398	tags=45%, list=31%, signal=65%
REGULATION_OF_TRANSCRIPTION_FACTOR_ACTIVITY	24	-0.226456	-0.485116	0.989556	1	1	3261	tags=38%, list=29%, signal=53%
MRNA_PROCESSING_GO_0006397	67	-0.191346	-0.484434	1	1	1	4292	tags=34%, list=39%, signal=56%
RESPONSE_TO_ENDOGENOUS_STIMULUS	159	-0.163243	-0.439719	1	1	1	3409	tags=26%, list=31%, signal=37%
RNA_CATABOLIC_PROCESS	17	-0.204546	-0.415772	0.99594	1	1	4814	tags=47%, list=43%, signal=83%
RIBONUCLEOPROTEIN_COMPLEX_BIOGENESIS_AND_ASSEMBLY	75	-0.130282	-0.332807	1	0.999876	1	4412	tags=32%, list=40%, signal=53%

## Sheet: OTX015_up
NAME	SIZE	ES	NES	NOM p-val	FDR q-val	FWER p-val	RANK AT MAX	LEADING EDGE
NEGATIVE_REGULATION_OF_CELL_CYCLE	64	0.609268	1.92172	0	0.0839567	0.074	867	tags=23%, list=8%, signal=25%
TRANSMEMBRANE_RECEPTOR_PROTEIN_SERINE_THREONINE_KINASE_SIGNALING_PATHWAY	29	0.607728	1.80509	0	0.158286	0.253	319	tags=14%, list=3%, signal=14%
TRANSFORMING_GROWTH_FACTOR_BETA_RECEPTOR_SIGNALING_PATHWAY	21	0.67395	1.8022	0.00389105	0.109167	0.263	319	tags=19%, list=3%, signal=20%
MITOTIC_CELL_CYCLE_CHECKPOINT	18	0.670128	1.69131	0.03125	0.223692	0.552	1	tags=6%, list=0%, signal=6%
CELL_CYCLE_ARREST_GO_0007050	46	0.545685	1.68235	0	0.191362	0.578	867	tags=22%, list=8%, signal=23%
REGULATION_OF_CYCLIN_DEPENDENT_PROTEIN_KINASE_ACTIVITY	41	0.544289	1.671	0	0.178898	0.622	170	tags=12%, list=2%, signal=12%
ENDOSOME_TRANSPORT	19	0.632289	1.60718	0.015625	0.246298	0.796	2612	tags=58%, list=24%, signal=76%
REGULATION_OF_CELL_CYCLE	152	0.421123	1.5927	0	0.239702	0.83	942	tags=13%, list=9%, signal=13%
REGULATION_OF_MITOSIS	33	0.5035	1.46334	0.0380952	0.480384	0.982	1	tags=3%, list=0%, signal=3%
SULFUR_METABOLIC_PROCESS	27	0.503978	1.41974	0.101266	0.55501	0.991	1613	tags=41%, list=15%, signal=48%
REGULATION_OF_PHOSPHORYLATION	26	0.488058	1.35981	0.120155	0.690694	0.998	264	tags=12%, list=2%, signal=12%
INTERPHASE_OF_MITOTIC_CELL_CYCLE	54	0.416737	1.35889	0.0552147	0.636228	0.998	117	tags=6%, list=1%, signal=6%
ELECTRON_TRANSPORT_GO_0006118	35	0.445726	1.30532	0.132653	0.764154	1	0	tags=3%, list=0%, signal=3%
INTERPHASE	58	0.384446	1.26544	0.0775862	0.861722	1	117	tags=5%, list=1%, signal=5%
MYELOID_CELL_DIFFERENTIATION	20	0.468056	1.22348	0.205882	0.974911	1	983	tags=20%, list=9%, signal=22%
PROTEIN_POLYMERIZATION	15	0.497413	1.21477	0.2	0.94827	1	1844	tags=20%, list=17%, signal=24%
NITROGEN_COMPOUND_CATABOLIC_PROCESS	17	0.485024	1.20838	0.18543	0.918478	1	1308	tags=29%, list=12%, signal=33%
ECTODERM_DEVELOPMENT	25	0.445677	1.20485	0.189723	0.881872	1	857	tags=20%, list=8%, signal=22%
RHO_PROTEIN_SIGNAL_TRANSDUCTION	22	0.454592	1.20212	0.207843	0.846363	1	182	tags=14%, list=2%, signal=14%
PHOSPHORYLATION	207	0.30705	1.19669	0.111111	0.823411	1	1132	tags=17%, list=10%, signal=18%
CELL_CYCLE_CHECKPOINT_GO_0000075	44	0.381737	1.17483	0.187097	0.867243	1	1	tags=2%, list=0%, signal=2%
MITOSIS	71	0.335908	1.17024	0.188889	0.843866	1	1	tags=1%, list=0%, signal=1%
STEROID_METABOLIC_PROCESS	28	0.424431	1.16702	0.229508	0.817444	1	525	tags=11%, list=5%, signal=11%
RESPONSE_TO_NUTRIENT_LEVELS	15	0.482054	1.15064	0.285714	0.842606	1	942	tags=33%, list=9%, signal=36%
CELL_CYCLE_GO_0007049	265	0.290201	1.1417	0	0.840962	1	532	tags=6%, list=5%, signal=7%
RESPONSE_TO_EXTRACELLULAR_STIMULUS	18	0.448196	1.14164	0.301887	0.808827	1	942	tags=28%, list=9%, signal=30%
M_PHASE_OF_MITOTIC_CELL_CYCLE	74	0.331875	1.13355	0.23622	0.804097	1	1	tags=1%, list=0%, signal=1%
MICROTUBULE_ORGANIZING_CENTER_ORGANIZATION_AND_BIOGENESIS	15	0.451734	1.10545	0.316327	0.868259	1	1930	tags=33%, list=17%, signal=40%
REGULATION_OF_CELL_PROLIFERATION	159	0.289039	1.09687	0.125	0.868225	1	437	tags=8%, list=4%, signal=8%
TISSUE_DEVELOPMENT	49	0.340639	1.09063	0.3	0.860418	1	905	tags=22%, list=8%, signal=24%
NEGATIVE_REGULATION_OF_CELL_PROLIFERATION	88	0.30814	1.08197	0.294118	0.860219	1	437	tags=9%, list=4%, signal=9%
BASE_EXCISION_REPAIR	15	0.438447	1.07809	0.372822	0.846759	1	361	tags=13%, list=3%, signal=14%
EPIDERMIS_DEVELOPMENT	19	0.398375	1.06357	0.383064	0.871098	1	857	tags=16%, list=8%, signal=17%
NEGATIVE_REGULATION_OF_SIGNAL_TRANSDUCTION	22	0.403557	1.05969	0.374046	0.858648	1	905	tags=27%, list=8%, signal=30%
HOMEOSTASIS_OF_NUMBER_OF_CELLS	15	0.424126	1.05553	0.361111	0.848909	1	816	tags=13%, list=7%, signal=14%
AMINE_CATABOLIC_PROCESS	15	0.42471	1.02899	0.417763	0.913926	1	1308	tags=27%, list=12%, signal=30%
ENZYME_LINKED_RECEPTOR_PROTEIN_SIGNALING_PATHWAY	77	0.293317	1.01056	0.481928	0.954364	1	816	tags=14%, list=7%, signal=15%
RESPONSE_TO_WOUNDING	56	0.307171	0.994996	0.465116	0.985087	1	519	tags=13%, list=5%, signal=13%
AMINO_ACID_METABOLIC_PROCESS	52	0.309028	0.993429	0.471338	0.964824	1	1613	tags=23%, list=15%, signal=27%
INSULIN_RECEPTOR_SIGNALING_PATHWAY	16	0.399705	0.989894	0.451389	0.952643	1	1487	tags=44%, list=13%, signal=50%
MITOTIC_CELL_CYCLE	130	0.262898	0.986581	0.465116	0.94048	1	117	tags=2%, list=1%, signal=2%
GENERATION_OF_PRECURSOR_METABOLITES_AND_ENERGY	88	0.271732	0.969772	0.505495	0.97557	1	1694	tags=17%, list=15%, signal=20%
POSITIVE_REGULATION_OF_CELL_PROLIFERATION	64	0.28803	0.951775	0.561538	1	1	586	tags=8%, list=5%, signal=8%
ENERGY_DERIVATION_BY_OXIDATION_OF_ORGANIC_COMPOUNDS	29	0.329433	0.943167	0.556522	1	1	1638	tags=21%, list=15%, signal=24%
PROTEIN_AMINO_ACID_PHOSPHORYLATION	182	0.235273	0.913364	0.72	1	1	1132	tags=16%, list=10%, signal=17%
REGULATION_OF_ANATOMICAL_STRUCTURE_MORPHOGENESIS	15	0.371531	0.906903	0.543554	1	1	983	tags=20%, list=9%, signal=22%
AMINO_ACID_AND_DERIVATIVE_METABOLIC_PROCESS	67	0.270475	0.906163	0.625	1	1	1690	tags=22%, list=15%, signal=26%
PROTEIN_AMINO_ACID_AUTOPHOSPHORYLATION	25	0.315047	0.893878	0.595833	1	1	1132	tags=20%, list=10%, signal=22%
POST_TRANSLATIONAL_PROTEIN_MODIFICATION	331	0.210949	0.889252	1	1	1	1358	tags=16%, list=12%, signal=18%
PROTEIN_AUTOPROCESSING	25	0.315047	0.870214	0.646789	1	1	1132	tags=20%, list=10%, signal=22%
M_PHASE	92	0.249393	0.868604	0.797619	1	1	205	tags=2%, list=2%, signal=2%
PROTEIN_PROCESSING	37	0.2648	0.825861	0.747573	1	1	1132	tags=19%, list=10%, signal=21%
REGULATION_OF_CELL_ADHESION	15	0.342016	0.811081	0.70347	1	1	4134	tags=60%, list=37%, signal=96%
PEROXISOME_ORGANIZATION_AND_BIOGENESIS	15	0.33678	0.809514	0.711409	1	1	2058	tags=33%, list=19%, signal=41%
ONE_CARBON_COMPOUND_METABOLIC_PROCESS	22	0.296159	0.805579	0.774193	1	1	742	tags=9%, list=7%, signal=10%
JAK_STAT_CASCADE	17	0.300838	0.759058	0.822148	1	1	2513	tags=41%, list=23%, signal=53%
GOLGI_VESICLE_TRANSPORT	47	0.229695	0.757468	0.884615	1	1	2161	tags=26%, list=20%, signal=32%
RNA_EXPORT_FROM_NUCLEUS	16	0.289448	0.741351	0.821192	1	1	7873	tags=100%, list=71%, signal=345%
CELLULAR_RESPIRATION	17	0.297341	0.733164	0.829268	1	1	7786	tags=100%, list=70%, signal=336%
TRNA_METABOLIC_PROCESS	19	0.280412	0.716626	0.886207	1	1	752	tags=11%, list=7%, signal=11%
SPLICEOSOME_ASSEMBLY	19	0.276049	0.710226	0.868526	1	1	8022	tags=100%, list=72%, signal=362%
NUCLEOTIDE_EXCISION_REPAIR	19	0.280855	0.700013	0.904943	1	1	1489	tags=21%, list=13%, signal=24%
UBIQUITIN_CYCLE	42	0.22006	0.687937	0.957447	1	1	2197	tags=26%, list=20%, signal=33%
MICROTUBULE_CYTOSKELETON_ORGANIZATION_AND_BIOGENESIS	35	0.227168	0.674893	0.948718	1	1	864	tags=9%, list=8%, signal=9%
NEGATIVE_REGULATION_OF_CELLULAR_COMPONENT_ORGANIZATION_AND_BIOGENESIS	23	0.246623	0.67009	0.92562	1	1	2296	tags=22%, list=21%, signal=27%
REGULATION_OF_RESPONSE_TO_STIMULUS	17	0.263232	0.649022	0.912458	1	1	2159	tags=35%, list=19%, signal=44%
REGULATION_OF_IMMUNE_SYSTEM_PROCESS	19	0.240023	0.63927	0.917603	1	1	3472	tags=53%, list=31%, signal=77%
PROTEIN_UBIQUITINATION	35	0.197279	0.624192	0.962963	1	1	2197	tags=26%, list=20%, signal=32%
REGULATION_OF_TRANSLATIONAL_INITIATION	25	0.225052	0.623581	0.954918	1	1	196	tags=4%, list=2%, signal=4%
RESPONSE_TO_DNA_DAMAGE_STIMULUS	138	0.166317	0.614254	1	1	1	1489	tags=12%, list=13%, signal=13%
DNA_REPAIR	111	0.163675	0.609384	1	1	1	3133	tags=29%, list=28%, signal=40%
TRANSCRIPTION_FROM_RNA_POLYMERASE_III_PROMOTER	18	0.232261	0.598754	0.940972	1	1	195	tags=6%, list=2%, signal=6%
AMINO_ACID_DERIVATIVE_METABOLIC_PROCESS	15	0.23062	0.587496	0.945848	1	1	1690	tags=20%, list=15%, signal=24%
NUCLEAR_EXPORT	29	0.200571	0.581845	0.969957	1	1	1557	tags=14%, list=14%, signal=16%
CELLULAR_MACROMOLECULE_CATABOLIC_PROCESS	83	0.160516	0.578111	1	1	1	2549	tags=22%, list=23%, signal=28%
CELLULAR_PROTEIN_CATABOLIC_PROCESS	53	0.176661	0.574739	1	1	1	2949	tags=30%, list=27%, signal=41%
TRANSLATIONAL_INITIATION	32	0.194657	0.573983	1	1	1	196	tags=3%, list=2%, signal=3%
PROTEIN_MODIFICATION_BY_SMALL_PROTEIN_CONJUGATION	38	0.187552	0.562479	0.994819	1	1	2197	tags=24%, list=20%, signal=29%
POSITIVE_REGULATION_OF_BINDING	15	0.228571	0.556775	0.956376	1	1	8546	tags=100%, list=77%, signal=437%
ORGANELLE_LOCALIZATION	19	0.199228	0.516541	0.985019	1	1	2180	tags=26%, list=20%, signal=33%
PROTEIN_CATABOLIC_PROCESS	60	0.126779	0.43396	1	1	1	2949	tags=27%, list=27%, signal=36%
PROTEIN_RNA_COMPLEX_ASSEMBLY	58	0.123081	0.415926	1	0.998766	1	196	tags=2%, list=2%, signal=2%

## Sheet: JQ1_down
NAME	SIZE	ES	NES	NOM p-val	FDR q-val	FWER p-val	RANK AT MAX	LEADING EDGE
G_PROTEIN_SIGNALING_COUPLED_TO_CAMP_NUCLEOTIDE_SECOND_MESSENGER	21	-0.822594	-1.88862	0	0.00802939	0.008	721	tags=43%, list=7%, signal=46%
G_PROTEIN_COUPLED_RECEPTOR_PROTEIN_SIGNALING_PATHWAY	98	-0.653855	-1.88116	0	0.00548568	0.011	1071	tags=27%, list=10%, signal=29%
SECOND_MESSENGER_MEDIATED_SIGNALING	45	-0.723481	-1.87427	0	0.00570902	0.017	1071	tags=31%, list=10%, signal=34%
TRANSMISSION_OF_NERVE_IMPULSE	77	-0.67043	-1.87218	0	0.00453986	0.018	951	tags=25%, list=9%, signal=27%
CYCLIC_NUCLEOTIDE_MEDIATED_SIGNALING	30	-0.771007	-1.84539	0	0.00541053	0.027	1071	tags=37%, list=10%, signal=40%
G_PROTEIN_SIGNALING_COUPLED_TO_CYCLIC_NUCLEOTIDE_SECOND_MESSENGER	28	-0.776931	-1.8449	0	0.00467756	0.028	1071	tags=39%, list=10%, signal=43%
CAMP_MEDIATED_SIGNALING	22	-0.818687	-1.83109	0	0.00544345	0.038	721	tags=41%, list=7%, signal=44%
SYNAPTIC_TRANSMISSION	69	-0.67022	-1.8263	0	0.00501109	0.04	951	tags=26%, list=9%, signal=28%
CELL_CELL_SIGNALING	133	-0.574897	-1.71027	0	0.0523462	0.376	1103	tags=25%, list=10%, signal=27%
NEUROLOGICAL_SYSTEM_PROCESS	137	-0.559993	-1.65183	0.0011976	0.121243	0.704	951	tags=19%, list=9%, signal=21%
SYSTEM_PROCESS	201	-0.52863	-1.64386	0	0.123858	0.751	951	tags=19%, list=9%, signal=21%
CELL_SURFACE_RECEPTOR_LINKED_SIGNAL_TRANSDUCTION_GO_0007166	250	-0.522408	-1.63566	0	0.126296	0.792	1071	tags=20%, list=10%, signal=22%
POSITIVE_REGULATION_OF_MAP_KINASE_ACTIVITY	31	-0.674114	-1.61393	0.0102041	0.155022	0.872	788	tags=26%, list=7%, signal=28%
ACTIVATION_OF_MAPK_ACTIVITY	26	-0.668303	-1.55303	0.0207715	0.296219	0.984	788	tags=23%, list=7%, signal=25%
EXOCYTOSIS	15	-0.749771	-1.54155	0.0277778	0.312592	0.99	1528	tags=40%, list=14%, signal=46%
ION_HOMEOSTASIS	50	-0.585681	-1.53655	0.0181818	0.310684	0.993	487	tags=12%, list=4%, signal=12%
REGULATION_OF_MAP_KINASE_ACTIVITY	45	-0.583841	-1.5085	0.0155587	0.388392	1	788	tags=22%, list=7%, signal=24%
POSITIVE_REGULATION_OF_CATALYTIC_ACTIVITY	100	-0.519853	-1.50325	0.00854701	0.383497	1	1651	tags=28%, list=15%, signal=33%
CELLULAR_CATION_HOMEOSTASIS	40	-0.581254	-1.48932	0.0415512	0.415842	1	1743	tags=28%, list=16%, signal=33%
SPHINGOLIPID_METABOLIC_PROCESS	20	-0.672839	-1.48749	0.0416667	0.402152	1	1618	tags=35%, list=15%, signal=41%
RESPONSE_TO_OTHER_ORGANISM	24	-0.635993	-1.47965	0.0495356	0.41243	1	1288	tags=21%, list=12%, signal=24%
RESPONSE_TO_VIRUS	19	-0.666502	-1.47854	0.039185	0.397831	1	1288	tags=26%, list=12%, signal=30%
CATION_HOMEOSTASIS	41	-0.556437	-1.45547	0.0442857	0.46758	1	1743	tags=27%, list=16%, signal=32%
CELLULAR_HOMEOSTASIS	60	-0.546879	-1.45413	0.0313351	0.453183	1	487	tags=10%, list=4%, signal=10%
MULTI_ORGANISM_PROCESS	48	-0.55384	-1.45257	0.0390516	0.441325	1	1288	tags=21%, list=12%, signal=23%
CHEMICAL_HOMEOSTASIS	62	-0.531999	-1.43826	0.0307487	0.478482	1	487	tags=10%, list=4%, signal=10%
STEROID_HORMONE_RECEPTOR_SIGNALING_PATHWAY	17	-0.654747	-1.43715	0.0774194	0.464979	1	1862	tags=29%, list=17%, signal=35%
INTRACELLULAR_RECEPTOR_MEDIATED_SIGNALING_PATHWAY	17	-0.654747	-1.41687	0.0692432	0.533471	1	1862	tags=29%, list=17%, signal=35%
PATTERN_SPECIFICATION_PROCESS	22	-0.621551	-1.3981	0.0957614	0.596394	1	1403	tags=36%, list=13%, signal=42%
MEMBRANE_LIPID_BIOSYNTHETIC_PROCESS	38	-0.559764	-1.39628	0.0399429	0.585226	1	1466	tags=21%, list=13%, signal=24%
POSITIVE_REGULATION_OF_I_KAPPAB_KINASE_NF_KAPPAB_CASCADE	64	-0.502642	-1.39145	0.0501355	0.588455	1	1306	tags=19%, list=12%, signal=21%
POSITIVE_REGULATION_OF_TRANSCRIPTIONDNA_DEPENDENT	89	-0.484194	-1.37038	0.0482233	0.66775	1	1734	tags=22%, list=16%, signal=26%
CELLULAR_COMPONENT_DISASSEMBLY	28	-0.583993	-1.37006	0.0779816	0.649063	1	1636	tags=25%, list=15%, signal=29%
MEMBRANE_LIPID_METABOLIC_PROCESS	67	-0.500834	-1.36316	0.0704042	0.662976	1	1618	tags=22%, list=15%, signal=26%
DNA_CATABOLIC_PROCESS	21	-0.611941	-1.36263	0.102919	0.647022	1	1693	tags=29%, list=15%, signal=34%
APOPTOTIC_NUCLEAR_CHANGES	18	-0.61921	-1.36119	0.113924	0.63576	1	1636	tags=22%, list=15%, signal=26%
ORGANIC_ACID_TRANSPORT	25	-0.569718	-1.35889	0.114701	0.628536	1	935	tags=32%, list=8%, signal=35%
POSITIVE_REGULATION_OF_TRANSFERASE_ACTIVITY	56	-0.505701	-1.35851	0.0773263	0.613636	1	788	tags=18%, list=7%, signal=19%
IMMUNE_RESPONSE	63	-0.497957	-1.35548	0.0799458	0.611309	1	1288	tags=22%, list=12%, signal=25%
MONOVALENT_INORGANIC_CATION_TRANSPORT	27	-0.572089	-1.35168	0.1	0.612144	1	1602	tags=37%, list=14%, signal=43%
BIOSYNTHETIC_PROCESS	324	-0.422755	-1.34609	0.00965665	0.620815	1	1525	tags=15%, list=14%, signal=16%
BRAIN_DEVELOPMENT	34	-0.542352	-1.33601	0.110106	0.650096	1	1657	tags=32%, list=15%, signal=38%
NUCLEOTIDE_METABOLIC_PROCESS	27	-0.554981	-1.33304	0.127055	0.648739	1	1132	tags=15%, list=10%, signal=16%
STRIATED_MUSCLE_DEVELOPMENT	24	-0.569639	-1.32891	0.130503	0.651832	1	1636	tags=25%, list=15%, signal=29%
POSITIVE_REGULATION_OF_TRANSCRIPTION	108	-0.454126	-1.31931	0.0568319	0.680524	1	1530	tags=19%, list=14%, signal=22%
AMINE_TRANSPORT	23	-0.567444	-1.31839	0.130503	0.669963	1	935	tags=30%, list=8%, signal=33%
REGULATION_OF_JNK_ACTIVITY	15	-0.618142	-1.31673	0.147249	0.663166	1	1223	tags=27%, list=11%, signal=30%
REGULATION_OF_TRANSPORT	36	-0.526448	-1.31575	0.116212	0.653642	1	1070	tags=19%, list=10%, signal=21%
TRANSCRIPTION_INITIATION	35	-0.52916	-1.31277	0.126437	0.653183	1	1993	tags=23%, list=18%, signal=28%
TRANSCRIPTION_INITIATION_FROM_RNA_POLYMERASE_II_PROMOTER	29	-0.538506	-1.3123	0.125937	0.641956	1	1734	tags=21%, list=16%, signal=24%
CARBOXYLIC_ACID_TRANSPORT	25	-0.569718	-1.31119	0.131934	0.634193	1	935	tags=32%, list=8%, signal=35%
POSITIVE_REGULATION_OF_TRANSCRIPTION_FROM_RNA_POLYMERASE_II_PROMOTER	52	-0.498288	-1.31005	0.122449	0.62663	1	1734	tags=27%, list=16%, signal=32%
FATTY_ACID_METABOLIC_PROCESS	35	-0.523782	-1.30968	0.133621	0.616364	1	1444	tags=26%, list=13%, signal=29%
RESPONSE_TO_BIOTIC_STIMULUS	50	-0.495799	-1.30888	0.107586	0.607903	1	1288	tags=14%, list=12%, signal=16%
CELL_STRUCTURE_DISASSEMBLY_DURING_APOPTOSIS	15	-0.619049	-1.30676	0.163666	0.605271	1	1636	tags=27%, list=15%, signal=31%
SKELETAL_MUSCLE_DEVELOPMENT	16	-0.611907	-1.30616	0.188406	0.596501	1	2187	tags=38%, list=20%, signal=47%
INTRACELLULAR_SIGNALING_CASCADE	408	-0.406538	-1.3055	0.00931677	0.58814	1	1306	tags=15%, list=12%, signal=17%
BEHAVIOR	39	-0.518208	-1.30548	0.143271	0.578103	1	249	tags=13%, list=2%, signal=13%
POSITIVE_REGULATION_OF_RNA_METABOLIC_PROCESS	91	-0.460317	-1.30539	0.074359	0.568492	1	1734	tags=22%, list=16%, signal=26%
CELLULAR_LIPID_CATABOLIC_PROCESS	20	-0.582214	-1.30458	0.143312	0.562032	1	1119	tags=30%, list=10%, signal=33%
REGULATION_OF_I_KAPPAB_KINASE_NF_KAPPAB_CASCADE	67	-0.473596	-1.29953	0.109608	0.571908	1	1306	tags=18%, list=12%, signal=20%
POSITIVE_REGULATION_OF_NUCLEOBASENUCLEOSIDENUCLEOTIDE_AND_NUCLEIC_ACID_METABOLIC_PROCESS	114	-0.433412	-1.29093	0.0856079	0.593969	1	1530	tags=18%, list=14%, signal=21%
LIPID_BIOSYNTHETIC_PROCESS	65	-0.464151	-1.27335	0.128272	0.651573	1	753	tags=11%, list=7%, signal=11%
AMINO_ACID_TRANSPORT	19	-0.572785	-1.26753	0.1875	0.663623	1	935	tags=32%, list=8%, signal=34%
I_KAPPAB_KINASE_NF_KAPPAB_CASCADE	81	-0.444105	-1.2655	0.106918	0.661683	1	1306	tags=17%, list=12%, signal=19%
LIPID_CATABOLIC_PROCESS	21	-0.552806	-1.26368	0.170279	0.658634	1	1119	tags=29%, list=10%, signal=32%
MITOCHONDRIAL_TRANSPORT	21	-0.555	-1.26311	0.187107	0.651162	1	215	tags=10%, list=2%, signal=10%
LEUKOCYTE_ACTIVATION	19	-0.562487	-1.26041	0.194847	0.652542	1	1510	tags=21%, list=14%, signal=24%
NITROGEN_COMPOUND_BIOSYNTHETIC_PROCESS	21	-0.560797	-1.25806	0.177316	0.651995	1	1521	tags=33%, list=14%, signal=39%
EMBRYONIC_DEVELOPMENT	40	-0.490808	-1.25398	0.183824	0.657404	1	2152	tags=38%, list=19%, signal=46%
IMMUNE_SYSTEM_PROCESS	109	-0.430079	-1.24824	0.13217	0.669858	1	1510	tags=19%, list=14%, signal=22%
PROTEIN_DNA_COMPLEX_ASSEMBLY	48	-0.474996	-1.24296	0.1625	0.68093	1	1993	tags=19%, list=18%, signal=23%
ANATOMICAL_STRUCTURE_FORMATION	28	-0.525098	-1.24275	0.168196	0.672403	1	550	tags=21%, list=5%, signal=22%
CELL_CELL_ADHESION	35	-0.50023	-1.23115	0.201429	0.709402	1	1657	tags=29%, list=15%, signal=33%
CELL_ACTIVATION	19	-0.562487	-1.22935	0.215311	0.706991	1	1510	tags=21%, list=14%, signal=24%
HOMEOSTATIC_PROCESS	95	-0.426673	-1.21988	0.150188	0.73621	1	487	tags=6%, list=4%, signal=7%
LYMPHOCYTE_ACTIVATION	18	-0.576642	-1.21922	0.2144	0.72902	1	1510	tags=22%, list=14%, signal=26%
RAS_PROTEIN_SIGNAL_TRANSDUCTION	39	-0.483212	-1.21921	0.196581	0.719699	1	788	tags=18%, list=7%, signal=19%
POSITIVE_REGULATION_OF_HYDROLASE_ACTIVITY	28	-0.517296	-1.21773	0.21944	0.716271	1	1636	tags=32%, list=15%, signal=38%
APOPTOTIC_PROGRAM	44	-0.470891	-1.21324	0.215364	0.724662	1	2521	tags=27%, list=23%, signal=35%
NUCLEOBASENUCLEOSIDE_AND_NUCLEOTIDE_METABOLIC_PROCESS	35	-0.48909	-1.21205	0.21146	0.720651	1	1132	tags=14%, list=10%, signal=16%
POSITIVE_REGULATION_OF_CELLULAR_METABOLIC_PROCESS	148	-0.405755	-1.20973	0.131855	0.721019	1	1530	tags=18%, list=14%, signal=20%
REGULATION_OF_INTRACELLULAR_TRANSPORT	16	-0.566157	-1.20952	0.242947	0.713216	1	1070	tags=19%, list=10%, signal=21%
POSITIVE_REGULATION_OF_METABOLIC_PROCESS	151	-0.401619	-1.20433	0.139089	0.723974	1	1530	tags=17%, list=14%, signal=20%
PROTEIN_AMINO_ACID_O_LINKED_GLYCOSYLATION	15	-0.55663	-1.2037	0.2272	0.71767	1	64	tags=7%, list=1%, signal=7%
JNK_CASCADE	37	-0.482811	-1.20318	0.22694	0.711327	1	1277	tags=22%, list=12%, signal=24%
MUSCLE_DEVELOPMENT	48	-0.455335	-1.20279	0.199192	0.704616	1	2187	tags=29%, list=20%, signal=36%
REGULATION_OF_NUCLEOCYTOPLASMIC_TRANSPORT	16	-0.566157	-1.19359	0.265823	0.732056	1	1070	tags=19%, list=10%, signal=21%
GLYCOPROTEIN_BIOSYNTHETIC_PROCESS	54	-0.451677	-1.19306	0.214876	0.725801	1	2439	tags=35%, list=22%, signal=45%
REGULATION_OF_MOLECULAR_FUNCTION	214	-0.381747	-1.1844	0.144781	0.751524	1	1651	tags=20%, list=15%, signal=23%
DNA_PACKAGING	28	-0.494182	-1.18211	0.254815	0.75226	1	919	tags=7%, list=8%, signal=8%
ION_TRANSPORT	60	-0.439047	-1.17959	0.215924	0.754485	1	617	tags=15%, list=6%, signal=16%
NUCLEAR_ORGANIZATION_AND_BIOGENESIS	23	-0.521077	-1.17885	0.248512	0.749383	1	2379	tags=30%, list=21%, signal=39%
REGULATION_OF_CATALYTIC_ACTIVITY	183	-0.383818	-1.17586	0.162712	0.753235	1	1651	tags=21%, list=15%, signal=24%
RECEPTOR_MEDIATED_ENDOCYTOSIS	18	-0.531692	-1.17322	0.285948	0.756021	1	1528	tags=33%, list=14%, signal=39%
STRESS_ACTIVATED_PROTEIN_KINASE_SIGNALING_PATHWAY	39	-0.472406	-1.16992	0.262931	0.760747	1	1277	tags=21%, list=12%, signal=23%
ORGAN_MORPHOGENESIS	73	-0.425175	-1.16676	0.217335	0.765309	1	981	tags=19%, list=9%, signal=21%
REGULATION_OF_BIOLOGICAL_QUALITY	204	-0.378341	-1.16566	0.164045	0.761837	1	1687	tags=17%, list=15%, signal=19%
CARBOHYDRATE_BIOSYNTHETIC_PROCESS	35	-0.465783	-1.16169	0.255352	0.76948	1	1170	tags=14%, list=11%, signal=16%
MACROMOLECULE_BIOSYNTHETIC_PROCESS	220	-0.375535	-1.16	0.162162	0.768597	1	1525	tags=13%, list=14%, signal=15%
CELLULAR_LIPID_METABOLIC_PROCESS	142	-0.388109	-1.1573	0.192217	0.771669	1	1651	tags=23%, list=15%, signal=26%
PROTEIN_KINASE_CASCADE	198	-0.376925	-1.15674	0.1875	0.766078	1	1306	tags=15%, list=12%, signal=17%
SYSTEM_DEVELOPMENT	418	-0.358214	-1.15654	0.111691	0.759216	1	1660	tags=21%, list=15%, signal=24%
SMALL_GTPASE_MEDIATED_SIGNAL_TRANSDUCTION	56	-0.433022	-1.15624	0.240947	0.753163	1	1651	tags=23%, list=15%, signal=27%
CELLULAR_BIOSYNTHETIC_PROCESS	219	-0.370215	-1.15584	0.181716	0.747291	1	1651	tags=13%, list=15%, signal=15%
COFACTOR_BIOSYNTHETIC_PROCESS	20	-0.506757	-1.155	0.285235	0.743112	1	1261	tags=25%, list=11%, signal=28%
ORGAN_DEVELOPMENT	266	-0.365989	-1.15144	0.168675	0.74946	1	1657	tags=19%, list=15%, signal=22%
LIPID_METABOLIC_PROCESS	180	-0.374047	-1.14861	0.208333	0.752993	1	1466	tags=20%, list=13%, signal=23%
SKELETAL_DEVELOPMENT	48	-0.438014	-1.14544	0.268194	0.757798	1	1918	tags=27%, list=17%, signal=33%
POSITIVE_REGULATION_OF_CASPASE_ACTIVITY	19	-0.503021	-1.13481	0.311321	0.789861	1	1636	tags=26%, list=15%, signal=31%
CATION_TRANSPORT	47	-0.436093	-1.13475	0.277702	0.782971	1	2083	tags=34%, list=19%, signal=42%
CARBOHYDRATE_METABOLIC_PROCESS	117	-0.387132	-1.13237	0.243667	0.78451	1	1197	tags=14%, list=11%, signal=15%
METAL_ION_TRANSPORT	33	-0.463412	-1.13141	0.313031	0.780956	1	2083	tags=45%, list=19%, signal=56%
GLYCOPROTEIN_METABOLIC_PROCESS	68	-0.410711	-1.12807	0.29249	0.786411	1	1004	tags=16%, list=9%, signal=18%
CENTRAL_NERVOUS_SYSTEM_DEVELOPMENT	77	-0.403773	-1.12718	0.278215	0.782679	1	1657	tags=29%, list=15%, signal=33%
TRANSCRIPTION_FROM_RNA_POLYMERASE_II_PROMOTER	363	-0.353922	-1.12561	0.190727	0.781906	1	799	tags=10%, list=7%, signal=10%
MAPKKK_CASCADE_GO_0000165	73	-0.40797	-1.12465	0.273087	0.778963	1	1277	tags=18%, list=12%, signal=20%
TRANSCRIPTION_DNA_DEPENDENT	492	-0.345006	-1.12065	0.169057	0.786603	1	2138	tags=20%, list=19%, signal=24%
DEFENSE_RESPONSE	66	-0.409202	-1.1199	0.278416	0.782528	1	1046	tags=18%, list=9%, signal=20%
HEART_DEVELOPMENT	20	-0.501201	-1.11717	0.336538	0.785948	1	1918	tags=45%, list=17%, signal=54%
NEGATIVE_REGULATION_OF_CATALYTIC_ACTIVITY	43	-0.444484	-1.11685	0.304094	0.780593	1	533	tags=12%, list=5%, signal=12%
REGULATION_OF_MITOSIS	33	-0.44993	-1.11445	0.329942	0.782947	1	3198	tags=33%, list=29%, signal=47%
RNA_BIOSYNTHETIC_PROCESS	494	-0.344296	-1.11186	0.187308	0.78615	1	2138	tags=20%, list=19%, signal=23%
RIBOSOME_BIOGENESIS_AND_ASSEMBLY	16	-0.50705	-1.1106	0.352308	0.784294	1	4724	tags=69%, list=43%, signal=120%
REGULATION_OF_TRANSCRIPTION_FROM_RNA_POLYMERASE_II_PROMOTER	228	-0.353305	-1.11005	0.241379	0.78007	1	1291	tags=13%, list=12%, signal=14%
CELLULAR_PROTEIN_COMPLEX_ASSEMBLY	22	-0.490764	-1.10527	0.364329	0.791154	1	1487	tags=18%, list=13%, signal=21%
NERVOUS_SYSTEM_DEVELOPMENT	216	-0.353711	-1.10424	0.267574	0.788692	1	1660	tags=24%, list=15%, signal=28%
CHROMOSOME_SEGREGATION	31	-0.453004	-1.10031	0.333333	0.796558	1	1690	tags=16%, list=15%, signal=19%
MEMBRANE_ORGANIZATION_AND_BIOGENESIS	88	-0.389379	-1.09877	0.310811	0.795841	1	1098	tags=15%, list=10%, signal=16%
ANGIOGENESIS	21	-0.48531	-1.0833	0.388535	0.844365	1	951	tags=19%, list=9%, signal=21%
REPRODUCTIVE_PROCESS	57	-0.402457	-1.07873	0.350205	0.85437	1	2590	tags=30%, list=23%, signal=39%
REGULATION_OF_TRANSCRIPTIONDNA_DEPENDENT	349	-0.338553	-1.07786	0.285565	0.850926	1	796	tags=9%, list=7%, signal=9%
CASPASE_ACTIVATION	17	-0.498612	-1.07714	0.373626	0.847212	1	1210	tags=18%, list=11%, signal=20%
SEXUAL_REPRODUCTION	51	-0.405396	-1.07286	0.351459	0.856555	1	1500	tags=16%, list=14%, signal=18%
POSITIVE_REGULATION_OF_MULTICELLULAR_ORGANISMAL_PROCESS	20	-0.479165	-1.07071	0.395931	0.857372	1	17	tags=5%, list=0%, signal=5%
NEGATIVE_REGULATION_OF_BINDING	15	-0.506192	-1.06901	0.402889	0.857314	1	1565	tags=33%, list=14%, signal=39%
MONOCARBOXYLIC_ACID_METABOLIC_PROCESS	43	-0.421228	-1.0673	0.365411	0.85705	1	1444	tags=21%, list=13%, signal=24%
CELL_PROJECTION_BIOGENESIS	18	-0.493828	-1.06681	0.399068	0.852503	1	962	tags=22%, list=9%, signal=24%
HEMOPOIESIS	33	-0.431265	-1.06522	0.378855	0.851921	1	1010	tags=15%, list=9%, signal=17%
REGULATION_OF_RNA_METABOLIC_PROCESS	356	-0.332223	-1.06362	0.316062	0.85149	1	796	tags=9%, list=7%, signal=9%
CHROMATIN_ASSEMBLY_OR_DISASSEMBLY	25	-0.447351	-1.06279	0.390719	0.848205	1	2781	tags=36%, list=25%, signal=48%
RESPONSE_TO_WOUNDING	56	-0.394972	-1.05553	0.381597	0.867911	1	1253	tags=20%, list=11%, signal=22%
REGULATION_OF_BINDING	37	-0.422547	-1.05326	0.397695	0.869353	1	1641	tags=19%, list=15%, signal=22%
REGULATION_OF_TRANSCRIPTION	426	-0.327273	-1.04876	0.354772	0.878456	1	1309	tags=12%, list=12%, signal=13%
TRANSMEMBRANE_RECEPTOR_PROTEIN_TYROSINE_KINASE_SIGNALING_PATHWAY	44	-0.408548	-1.04851	0.394625	0.873374	1	456	tags=9%, list=4%, signal=9%
VASCULATURE_DEVELOPMENT	26	-0.443005	-1.03962	0.406393	0.897603	1	951	tags=15%, list=9%, signal=17%
INFLAMMATORY_RESPONSE	36	-0.427007	-1.03754	0.420373	0.898891	1	1253	tags=22%, list=11%, signal=25%
REGULATION_OF_CELL_MIGRATION	15	-0.495897	-1.0362	0.436908	0.89711	1	961	tags=20%, list=9%, signal=22%
REGULATION_OF_HYDROLASE_ACTIVITY	44	-0.394383	-1.03512	0.414804	0.894751	1	1636	tags=25%, list=15%, signal=29%
HEMOPOIETIC_OR_LYMPHOID_ORGAN_DEVELOPMENT	34	-0.417999	-1.03117	0.436963	0.90217	1	2278	tags=26%, list=21%, signal=33%
SECONDARY_METABOLIC_PROCESS	17	-0.473257	-1.02919	0.436393	0.903123	1	1261	tags=18%, list=11%, signal=20%
REPRODUCTION	97	-0.355191	-1.02572	0.4266	0.90966	1	1309	tags=12%, list=12%, signal=14%
CELL_MIGRATION	49	-0.386659	-1.02558	0.421965	0.904209	1	1038	tags=16%, list=9%, signal=18%
RESPONSE_TO_RADIATION	38	-0.414577	-1.02429	0.445698	0.902552	1	1384	tags=18%, list=12%, signal=21%
MEIOTIC_CELL_CYCLE	23	-0.44724	-1.02045	0.452012	0.909704	1	731	tags=9%, list=7%, signal=9%
REGULATION_OF_NUCLEOBASENUCLEOSIDENUCLEOTIDE_AND_NUCLEIC_ACID_METABOLIC_PROCESS	466	-0.314538	-1.02016	0.439709	0.904798	1	1924	tags=16%, list=17%, signal=18%
RESPONSE_TO_EXTERNAL_STIMULUS	99	-0.351066	-1.01723	0.440955	0.908325	1	1375	tags=19%, list=12%, signal=22%
REGULATION_OF_PROTEIN_KINASE_ACTIVITY	114	-0.343321	-1.00453	0.472087	0.944653	1	1277	tags=16%, list=12%, signal=18%
REGULATION_OF_MULTICELLULAR_ORGANISMAL_PROCESS	44	-0.390068	-1.00402	0.476454	0.940326	1	1070	tags=16%, list=10%, signal=18%
MITOTIC_SISTER_CHROMATID_SEGREGATION	15	-0.479039	-1.00379	0.4768	0.935065	1	3489	tags=40%, list=32%, signal=58%
SISTER_CHROMATID_SEGREGATION	16	-0.466656	-1.00201	0.507177	0.935179	1	3489	tags=38%, list=32%, signal=55%
REGULATION_OF_DNA_REPLICATION	17	-0.455219	-1.0006	0.486088	0.93414	1	3226	tags=35%, list=29%, signal=50%
MITOCHONDRION_ORGANIZATION_AND_BIOGENESIS	44	-0.388176	-1.00016	0.467903	0.929918	1	2837	tags=30%, list=26%, signal=40%
IMMUNE_SYSTEM_DEVELOPMENT	36	-0.405528	-0.999016	0.484892	0.928034	1	2278	tags=25%, list=21%, signal=31%
REGULATION_OF_GENE_EXPRESSION	486	-0.30826	-0.997993	0.491649	0.92589	1	1752	tags=15%, list=16%, signal=17%
REGULATION_OF_KINASE_ACTIVITY	116	-0.340336	-0.997696	0.466981	0.92126	1	788	tags=11%, list=7%, signal=12%
DNA_RECOMBINATION	35	-0.402916	-0.996097	0.485075	0.920821	1	126	tags=3%, list=1%, signal=3%
RESPONSE_TO_ORGANIC_SUBSTANCE	17	-0.450823	-0.995407	0.467005	0.917289	1	824	tags=12%, list=7%, signal=13%
REGULATION_OF_DNA_METABOLIC_PROCESS	36	-0.395269	-0.994442	0.464534	0.914924	1	2289	tags=19%, list=21%, signal=24%
NUCLEOBASENUCLEOSIDENUCLEOTIDE_AND_NUCLEIC_ACID_TRANSPORT	21	-0.433428	-0.986987	0.479495	0.932234	1	198	tags=5%, list=2%, signal=5%
NEGATIVE_REGULATION_OF_TRANSCRIPTION_FROM_RNA_POLYMERASE_II_PROMOTER	63	-0.367869	-0.985936	0.495251	0.930342	1	1208	tags=14%, list=11%, signal=16%
REGULATION_OF_TRANSFERASE_ACTIVITY	119	-0.334614	-0.984035	0.514599	0.930833	1	1277	tags=16%, list=12%, signal=18%
RHO_PROTEIN_SIGNAL_TRANSDUCTION	22	-0.437207	-0.984006	0.499253	0.925551	1	707	tags=14%, list=6%, signal=15%
REGULATION_OF_SIGNAL_TRANSDUCTION	140	-0.329398	-0.982669	0.506928	0.924159	1	1306	tags=17%, list=12%, signal=19%
ACTIN_FILAMENT_ORGANIZATION	17	-0.456067	-0.982618	0.504013	0.919017	1	1464	tags=29%, list=13%, signal=34%
REGULATION_OF_G_PROTEIN_COUPLED_RECEPTOR_PROTEIN_SIGNALING_PATHWAY	16	-0.457777	-0.980894	0.518692	0.918988	1	1651	tags=38%, list=15%, signal=44%
POSITIVE_REGULATION_OF_SIGNAL_TRANSDUCTION	80	-0.349872	-0.98089	0.499376	0.913807	1	1306	tags=16%, list=12%, signal=18%
RESPONSE_TO_LIGHT_STIMULUS	27	-0.418144	-0.978847	0.51446	0.914916	1	1384	tags=19%, list=12%, signal=21%
DNA_REPLICATION_INITIATION	15	-0.45223	-0.973006	0.5056	0.927222	1	2842	tags=40%, list=26%, signal=54%
GAMETE_GENERATION	46	-0.370056	-0.972441	0.515805	0.92372	1	1500	tags=13%, list=14%, signal=15%
POSITIVE_REGULATION_OF_BIOLOGICAL_PROCESS	424	-0.301838	-0.970905	0.577595	0.923535	1	1530	tags=14%, list=14%, signal=16%
ER_TO_GOLGI_VESICLE_MEDIATED_TRANSPORT	18	-0.44975	-0.970556	0.516588	0.919442	1	2273	tags=33%, list=21%, signal=42%
RESPONSE_TO_ABIOTIC_STIMULUS	56	-0.367174	-0.967495	0.531459	0.923349	1	1473	tags=16%, list=13%, signal=18%
PROTEIN_COMPLEX_ASSEMBLY	118	-0.330804	-0.965083	0.529925	0.925265	1	1565	tags=14%, list=14%, signal=17%
CELLULAR_COMPONENT_ASSEMBLY	232	-0.308939	-0.963971	0.55814	0.923379	1	1734	tags=13%, list=16%, signal=15%
DNA_INTEGRITY_CHECKPOINT	21	-0.426553	-0.961112	0.520458	0.926986	1	2842	tags=43%, list=26%, signal=58%
CHROMOSOME_ORGANIZATION_AND_BIOGENESIS	109	-0.328704	-0.960699	0.531288	0.923139	1	1898	tags=15%, list=17%, signal=18%
NEGATIVE_REGULATION_OF_DEVELOPMENTAL_PROCESS	123	-0.324682	-0.959469	0.557621	0.921944	1	1755	tags=15%, list=16%, signal=18%
RESPONSE_TO_HORMONE_STIMULUS	23	-0.417391	-0.957422	0.517293	0.92286	1	2021	tags=22%, list=18%, signal=27%
SENSORY_PERCEPTION	61	-0.350961	-0.947798	0.566216	0.944957	1	923	tags=11%, list=8%, signal=12%
MITOSIS	71	-0.340936	-0.942252	0.555858	0.955728	1	3489	tags=31%, list=32%, signal=45%
PROTEIN_AMINO_ACID_N_LINKED_GLYCOSYLATION	22	-0.411816	-0.94094	0.542636	0.95423	1	1731	tags=27%, list=16%, signal=32%
MACROMOLECULAR_COMPLEX_ASSEMBLY	221	-0.303302	-0.93866	0.628191	0.955341	1	1734	tags=13%, list=16%, signal=15%
TRNA_METABOLIC_PROCESS	19	-0.422768	-0.936099	0.549383	0.957563	1	1515	tags=16%, list=14%, signal=18%
ANATOMICAL_STRUCTURE_MORPHOGENESIS	210	-0.30272	-0.933257	0.638202	0.960451	1	1657	tags=21%, list=15%, signal=24%
POSITIVE_REGULATION_OF_CELLULAR_PROCESS	412	-0.291216	-0.932918	0.670103	0.956544	1	1530	tags=14%, list=14%, signal=16%
COFACTOR_METABOLIC_PROCESS	42	-0.373811	-0.932168	0.576705	0.953817	1	1261	tags=14%, list=11%, signal=16%
GLYCEROPHOSPHOLIPID_BIOSYNTHETIC_PROCESS	24	-0.399825	-0.930398	0.56049	0.953771	1	1466	tags=17%, list=13%, signal=19%
TRANSPORT	481	-0.287178	-0.929633	0.691023	0.950879	1	1620	tags=14%, list=15%, signal=16%
REGULATION_OF_ORGANELLE_ORGANIZATION_AND_BIOGENESIS	37	-0.372823	-0.928595	0.585122	0.94896	1	2175	tags=30%, list=20%, signal=37%
NITROGEN_COMPOUND_METABOLIC_PROCESS	102	-0.315972	-0.921199	0.604506	0.964151	1	1606	tags=16%, list=15%, signal=18%
PHOSPHOLIPID_METABOLIC_PROCESS	48	-0.351516	-0.918683	0.587744	0.965868	1	1466	tags=15%, list=13%, signal=17%
ACTIN_CYTOSKELETON_ORGANIZATION_AND_BIOGENESIS	75	-0.329728	-0.918503	0.61658	0.961562	1	1488	tags=16%, list=13%, signal=18%
PHOSPHOLIPID_BIOSYNTHETIC_PROCESS	32	-0.388877	-0.915529	0.594354	0.964761	1	1466	tags=16%, list=13%, signal=18%
ORGANELLE_ORGANIZATION_AND_BIOGENESIS	394	-0.284394	-0.908767	0.750789	0.977265	1	1694	tags=12%, list=15%, signal=14%
RESPONSE_TO_CHEMICAL_STIMULUS	154	-0.298112	-0.908356	0.653179	0.973455	1	1038	tags=12%, list=9%, signal=13%
CYTOSKELETON_ORGANIZATION_AND_BIOGENESIS	160	-0.299685	-0.906563	0.663254	0.973107	1	1488	tags=13%, list=13%, signal=14%
CELL_PROLIFERATION_GO_0008283	278	-0.287345	-0.906416	0.706568	0.968802	1	1630	tags=14%, list=15%, signal=16%
REGULATION_OF_DNA_BINDING	29	-0.378683	-0.903936	0.596626	0.970447	1	1641	tags=21%, list=15%, signal=24%
M_PHASE_OF_MITOTIC_CELL_CYCLE	74	-0.328081	-0.901611	0.630406	0.971587	1	3489	tags=30%, list=32%, signal=43%
REGULATION_OF_CELL_DIFFERENTIATION	29	-0.367384	-0.899565	0.609398	0.972045	1	2304	tags=31%, list=21%, signal=39%
CELL_DEVELOPMENT	360	-0.281098	-0.891521	0.771429	0.987736	1	1358	tags=11%, list=12%, signal=12%
DOUBLE_STRAND_BREAK_REPAIR	22	-0.382727	-0.879203	0.627273	1	1	1824	tags=18%, list=16%, signal=22%
CARBOXYLIC_ACID_METABOLIC_PROCESS	108	-0.300284	-0.87884	0.716049	1	1	1521	tags=17%, list=14%, signal=19%
M_PHASE	92	-0.313185	-0.873435	0.717419	1	1	2997	tags=22%, list=27%, signal=30%
RESPONSE_TO_UV	17	-0.404807	-0.86966	0.638462	1	1	1162	tags=18%, list=10%, signal=20%
GROWTH	46	-0.331762	-0.868253	0.680791	1	1	1651	tags=24%, list=15%, signal=28%
LIPOPROTEIN_METABOLIC_PROCESS	22	-0.372737	-0.867498	0.636081	1	1	1466	tags=18%, list=13%, signal=21%
ANTI_APOPTOSIS	84	-0.309142	-0.8628	0.703085	1	1	1872	tags=15%, list=17%, signal=18%
ACTIN_FILAMENT_BASED_PROCESS	80	-0.308442	-0.860131	0.722362	1	1	1488	tags=15%, list=13%, signal=17%
REGULATION_OF_SMALL_GTPASE_MEDIATED_SIGNAL_TRANSDUCTION	15	-0.412613	-0.850723	0.674304	1	1	783	tags=20%, list=7%, signal=21%
PROGRAMMED_CELL_DEATH	284	-0.267018	-0.843565	0.836403	1	1	1996	tags=17%, list=18%, signal=20%
PROTEIN_TARGETING	95	-0.29207	-0.843024	0.745993	1	1	2631	tags=24%, list=24%, signal=31%
MRNA_PROCESSING_GO_0006397	67	-0.307295	-0.839921	0.747436	1	1	4038	tags=40%, list=36%, signal=63%
APOPTOSIS_GO	283	-0.264579	-0.835986	0.858209	1	1	1996	tags=16%, list=18%, signal=19%
ENZYME_LINKED_RECEPTOR_PROTEIN_SIGNALING_PATHWAY	77	-0.294663	-0.819452	0.78133	1	1	1592	tags=17%, list=14%, signal=20%
RESPONSE_TO_OXIDATIVE_STRESS	36	-0.329227	-0.814836	0.745714	1	1	892	tags=11%, list=8%, signal=12%
NEGATIVE_REGULATION_OF_PROGRAMMED_CELL_DEATH	103	-0.283784	-0.814235	0.816708	1	1	1755	tags=15%, list=16%, signal=17%
ORGANIC_ACID_METABOLIC_PROCESS	110	-0.280639	-0.810646	0.809524	1	1	1521	tags=16%, list=14%, signal=19%
PROTEIN_TRANSPORT	131	-0.272796	-0.808619	0.840286	1	1	1612	tags=12%, list=15%, signal=14%
LOCOMOTORY_BEHAVIOR	22	-0.36036	-0.808615	0.734663	1	1	1288	tags=23%, list=12%, signal=26%
MRNA_METABOLIC_PROCESS	76	-0.288135	-0.80365	0.818538	1	1	3937	tags=39%, list=36%, signal=61%
REGULATION_OF_CYTOSKELETON_ORGANIZATION_AND_BIOGENESIS	27	-0.343025	-0.799912	0.749636	1	1	2175	tags=30%, list=20%, signal=37%
NEGATIVE_REGULATION_OF_APOPTOSIS	102	-0.280887	-0.799911	0.847747	1	1	1358	tags=11%, list=12%, signal=12%
LIPOPROTEIN_BIOSYNTHETIC_PROCESS	19	-0.360283	-0.799788	0.74127	1	1	2084	tags=21%, list=19%, signal=26%
PROTEIN_AMINO_ACID_LIPIDATION	19	-0.360283	-0.798465	0.732057	1	1	2084	tags=21%, list=19%, signal=26%
RNA_SPLICINGVIA_TRANSESTERIFICATION_REACTIONS	33	-0.328053	-0.795216	0.761905	1	1	2788	tags=30%, list=25%, signal=40%
NEGATIVE_REGULATION_OF_TRANSCRIPTION_DNA_DEPENDENT	101	-0.272885	-0.794211	0.8356	1	1	3005	tags=33%, list=27%, signal=44%
NEGATIVE_REGULATION_OF_RNA_METABOLIC_PROCESS	102	-0.275844	-0.79298	0.849624	1	1	3005	tags=33%, list=27%, signal=45%
DNA_DAMAGE_CHECKPOINT	17	-0.371015	-0.790763	0.754687	1	1	2098	tags=29%, list=19%, signal=36%
NEGATIVE_REGULATION_OF_TRANSCRIPTION	148	-0.260034	-0.789168	0.879391	1	1	1309	tags=11%, list=12%, signal=12%
GENERATION_OF_PRECURSOR_METABOLITES_AND_ENERGY	88	-0.277295	-0.786724	0.836999	1	1	1099	tags=13%, list=10%, signal=14%
RNA_PROCESSING	159	-0.257933	-0.786041	0.887732	1	1	3937	tags=35%, list=36%, signal=54%
INTRACELLULAR_PROTEIN_TRANSPORT	123	-0.265741	-0.783268	0.884298	1	1	1612	tags=11%, list=15%, signal=13%
ESTABLISHMENT_OF_PROTEIN_LOCALIZATION	146	-0.261239	-0.781177	0.884161	1	1	1612	tags=12%, list=15%, signal=14%
TRANSLATION	122	-0.263883	-0.775471	0.884849	1	1	3168	tags=20%, list=29%, signal=28%
RNA_SPLICING	86	-0.275624	-0.77466	0.867995	1	1	3511	tags=31%, list=32%, signal=46%
REGULATION_OF_DEVELOPMENTAL_PROCESS	280	-0.244355	-0.771511	0.947484	1	1	1235	tags=11%, list=11%, signal=12%
PROTEIN_MODIFICATION_PROCESS	451	-0.240019	-0.766772	0.972308	1	1	1673	tags=14%, list=15%, signal=16%
SECRETION	96	-0.266609	-0.761859	0.883807	1	1	1528	tags=14%, list=14%, signal=16%
PROTEIN_LOCALIZATION	164	-0.251597	-0.761173	0.926573	1	1	1612	tags=12%, list=15%, signal=14%
PROTEIN_FOLDING	53	-0.290086	-0.759916	0.835801	1	1	3474	tags=40%, list=31%, signal=57%
ACTIVATION_OF_PROTEIN_KINASE_ACTIVITY	19	-0.339087	-0.756144	0.814173	1	1	1277	tags=21%, list=12%, signal=24%
BIOPOLYMER_MODIFICATION	467	-0.233125	-0.754497	0.980167	1	1	1673	tags=14%, list=15%, signal=16%
NEGATIVE_REGULATION_OF_NUCLEOBASENUCLEOSIDENUCLEOTIDE_AND_NUCLEIC_ACID_METABOLIC_PROCESS	166	-0.249179	-0.754035	0.935706	1	1	1309	tags=10%, list=12%, signal=11%
RESPONSE_TO_HYPOXIA	20	-0.334207	-0.753429	0.791476	1	1	2253	tags=20%, list=20%, signal=25%
REGULATION_OF_CELL_GROWTH	33	-0.308323	-0.75203	0.811573	1	1	1651	tags=24%, list=15%, signal=28%
MITOTIC_CELL_CYCLE_CHECKPOINT	18	-0.33939	-0.744557	0.828393	1	1	2811	tags=28%, list=25%, signal=37%
REGULATION_OF_CELLULAR_COMPONENT_ORGANIZATION_AND_BIOGENESIS	97	-0.258309	-0.743895	0.903388	1	1	1612	tags=18%, list=15%, signal=20%
REGULATION_OF_GROWTH	38	-0.294294	-0.739421	0.841499	1	1	1651	tags=24%, list=15%, signal=28%
INDUCTION_OF_APOPTOSIS_BY_INTRACELLULAR_SIGNALS	17	-0.342226	-0.737312	0.8112	1	1	2878	tags=35%, list=26%, signal=48%
LIPID_TRANSPORT	16	-0.335987	-0.735046	0.819466	1	1	184	tags=6%, list=2%, signal=6%
SECRETORY_PATHWAY	66	-0.270056	-0.734885	0.892208	1	1	1690	tags=17%, list=15%, signal=20%
DNA_DEPENDENT_DNA_REPLICATION	48	-0.284133	-0.732608	0.865358	1	1	3645	tags=29%, list=33%, signal=43%
HETEROCYCLE_METABOLIC_PROCESS	20	-0.32413	-0.73171	0.807463	1	1	3068	tags=35%, list=28%, signal=48%
ACTIN_POLYMERIZATION_AND_OR_DEPOLYMERIZATION	17	-0.340634	-0.72959	0.811802	1	1	1942	tags=18%, list=18%, signal=21%
CELLULAR_CARBOHYDRATE_METABOLIC_PROCESS	84	-0.259855	-0.728951	0.910644	1	1	1197	tags=11%, list=11%, signal=12%
REGULATION_OF_PROGRAMMED_CELL_DEATH	226	-0.231562	-0.7267	0.975851	1	1	1996	tags=16%, list=18%, signal=20%
INDUCTION_OF_APOPTOSIS_BY_EXTRACELLULAR_SIGNALS	19	-0.319144	-0.713787	0.834101	1	1	1969	tags=21%, list=18%, signal=26%
MACROMOLECULE_LOCALIZATION	181	-0.235188	-0.712899	0.969457	1	1	1612	tags=11%, list=15%, signal=13%
PROTEIN_IMPORT_INTO_NUCLEUS	39	-0.281312	-0.708686	0.865994	1	1	1496	tags=15%, list=14%, signal=18%
CELL_SUBSTRATE_ADHESION	19	-0.321436	-0.707263	0.849923	1	1	1526	tags=21%, list=14%, signal=24%
CELL_CYCLE_CHECKPOINT_GO_0000075	44	-0.272194	-0.706382	0.879044	1	1	2967	tags=34%, list=27%, signal=46%
NUCLEAR_IMPORT	41	-0.278872	-0.706163	0.883753	1	1	1496	tags=15%, list=14%, signal=17%
REGULATION_OF_APOPTOSIS	225	-0.228213	-0.703566	0.979189	1	1	1996	tags=16%, list=18%, signal=19%
NEGATIVE_REGULATION_OF_METABOLIC_PROCESS	196	-0.226119	-0.703225	0.978385	1	1	1309	tags=11%, list=12%, signal=13%
CELL_MATRIX_ADHESION	19	-0.321436	-0.701081	0.858086	1	1	1526	tags=21%, list=14%, signal=24%
NEGATIVE_REGULATION_OF_CELLULAR_METABOLIC_PROCESS	195	-0.226518	-0.687636	0.98427	1	1	1309	tags=11%, list=12%, signal=13%
CYTOKINE_PRODUCTION	20	-0.307034	-0.684046	0.881029	1	1	1510	tags=25%, list=14%, signal=29%
REGULATION_OF_TRANSCRIPTION_FACTOR_ACTIVITY	24	-0.292955	-0.683767	0.886364	1	1	1641	tags=21%, list=15%, signal=24%
VIRAL_REPRODUCTIVE_PROCESS	21	-0.303674	-0.679854	0.880126	1	1	3778	tags=43%, list=34%, signal=65%
AMINE_METABOLIC_PROCESS	89	-0.240882	-0.674086	0.966624	1	1	1606	tags=13%, list=15%, signal=16%
GLYCEROPHOSPHOLIPID_METABOLIC_PROCESS	32	-0.275363	-0.66902	0.895803	1	1	354	tags=6%, list=3%, signal=6%
CELL_CYCLE_PHASE	138	-0.2243	-0.668906	0.983664	1	1	2860	tags=22%, list=26%, signal=30%
PHOSPHOINOSITIDE_BIOSYNTHETIC_PROCESS	21	-0.292669	-0.657792	0.890323	1	1	1466	tags=14%, list=13%, signal=16%
PEPTIDYL_AMINO_ACID_MODIFICATION	45	-0.25354	-0.654298	0.950954	1	1	456	tags=4%, list=4%, signal=5%
ALCOHOL_METABOLIC_PROCESS	56	-0.241506	-0.648624	0.951807	1	1	1232	tags=14%, list=11%, signal=16%
WOUND_HEALING	16	-0.290793	-0.638289	0.890729	1	1	1687	tags=19%, list=15%, signal=22%
CHROMATIN_REMODELING	23	-0.276813	-0.632597	0.950233	1	1	3037	tags=30%, list=27%, signal=42%
DNA_DAMAGE_RESPONSESIGNAL_TRANSDUCTION	26	-0.270456	-0.631956	0.939815	1	1	2753	tags=31%, list=25%, signal=41%
TRANSCRIPTION_FROM_RNA_POLYMERASE_III_PROMOTER	18	-0.292887	-0.631358	0.909091	1	1	355	tags=6%, list=3%, signal=6%
MEMBRANE_FUSION	19	-0.284157	-0.63108	0.928458	1	1	382	tags=5%, list=3%, signal=5%
AROMATIC_COMPOUND_METABOLIC_PROCESS	17	-0.292369	-0.624136	0.91654	1	1	3204	tags=47%, list=29%, signal=66%
CELL_CYCLE_PROCESS	161	-0.204618	-0.614426	0.997722	1	1	2997	tags=24%, list=27%, signal=32%
CELL_DIVISION	18	-0.27752	-0.608239	0.949231	1	1	2352	tags=28%, list=21%, signal=35%
BIOPOLYMER_CATABOLIC_PROCESS	99	-0.209324	-0.606692	0.997413	1	1	3198	tags=25%, list=29%, signal=35%
CELLULAR_CATABOLIC_PROCESS	156	-0.199932	-0.598154	1	1	1	1285	tags=9%, list=12%, signal=10%
NEGATIVE_REGULATION_OF_DNA_METABOLIC_PROCESS	17	-0.270689	-0.591735	0.939641	1	1	3226	tags=29%, list=29%, signal=41%
DNA_METABOLIC_PROCESS	214	-0.191206	-0.591646	1	1	1	2481	tags=15%, list=22%, signal=19%
REGULATION_OF_GENE_EXPRESSION_EPIGENETIC	25	-0.255759	-0.589943	0.954338	1	1	2781	tags=32%, list=25%, signal=43%
REGULATION_OF_PROTEIN_STABILITY	16	-0.266902	-0.58017	0.937597	1	1	2342	tags=31%, list=21%, signal=40%
MICROTUBULE_BASED_MOVEMENT	15	-0.268508	-0.577187	0.955707	1	1	1410	tags=13%, list=13%, signal=15%
CATABOLIC_PROCESS	164	-0.189577	-0.575333	1	1	1	1285	tags=9%, list=12%, signal=10%
MICROTUBULE_BASED_PROCESS	75	-0.207393	-0.569829	0.997416	1	1	1464	tags=12%, list=13%, signal=14%
MAINTENANCE_OF_LOCALIZATION	15	-0.271331	-0.566574	0.965892	1	1	396	tags=7%, list=4%, signal=7%
NUCLEOCYTOPLASMIC_TRANSPORT	74	-0.203658	-0.565432	0.997399	1	1	2786	tags=24%, list=25%, signal=32%
PHOSPHOINOSITIDE_METABOLIC_PROCESS	26	-0.238608	-0.565424	0.972769	1	1	1466	tags=12%, list=13%, signal=13%
PROTEIN_IMPORT	53	-0.217134	-0.564844	0.987569	1	1	1565	tags=13%, list=14%, signal=15%
COENZYME_METABOLIC_PROCESS	28	-0.236944	-0.558468	0.981982	1	1	1232	tags=11%, list=11%, signal=12%
G1_S_TRANSITION_OF_MITOTIC_CELL_CYCLE	24	-0.24507	-0.557314	0.975347	1	1	3905	tags=58%, list=35%, signal=90%
ESTABLISHMENT_AND_OR_MAINTENANCE_OF_CHROMATIN_ARCHITECTURE	68	-0.199981	-0.543746	1	1	1	2781	tags=21%, list=25%, signal=27%
MACROMOLECULE_CATABOLIC_PROCESS	110	-0.185062	-0.539011	1	1	1	3198	tags=24%, list=29%, signal=33%
POSITIVE_REGULATION_OF_PROTEIN_MODIFICATION_PROCESS	15	-0.253304	-0.5294	0.975962	1	1	2663	tags=27%, list=24%, signal=35%
VIRAL_INFECTIOUS_CYCLE	18	-0.243396	-0.527221	0.970492	1	1	3778	tags=39%, list=34%, signal=59%
REGULATION_OF_BODY_FLUID_LEVELS	16	-0.236964	-0.512426	0.974085	1	1	2114	tags=19%, list=19%, signal=23%
CYTOKINESIS	16	-0.237599	-0.50449	0.980092	1	1	3185	tags=38%, list=29%, signal=53%
CHROMATIN_MODIFICATION	49	-0.179334	-0.474983	1	1	1	2781	tags=20%, list=25%, signal=27%
VIRAL_REPRODUCTION	24	-0.205215	-0.471185	0.998459	0.998962	1	3778	tags=38%, list=34%, signal=57%
RNA_CATABOLIC_PROCESS	17	-0.181273	-0.396094	0.995327	0.999187	1	3814	tags=47%, list=34%, signal=72%

## Sheet: JQ1_up
NAME	SIZE	ES	NES	NOM p-val	FDR q-val	FWER p-val	RANK AT MAX	LEADING EDGE
NEGATIVE_REGULATION_OF_CELL_CYCLE	64	0.539619	1.71415	0.003663	0.638352	0.468	1123	tags=23%, list=10%, signal=26%
ENDOSOME_TRANSPORT	19	0.666872	1.6744	0.0129199	0.475957	0.609	145	tags=16%, list=1%, signal=16%
REGULATION_OF_CYCLIN_DEPENDENT_PROTEIN_KINASE_ACTIVITY	41	0.507915	1.53332	0.0167224	1	0.948	910	tags=17%, list=8%, signal=19%
REGULATION_OF_CELL_CYCLE	152	0.411286	1.52186	0	0.839361	0.956	910	tags=13%, list=8%, signal=13%
CELLULAR_MORPHOGENESIS_DURING_DIFFERENTIATION	31	0.534284	1.50793	0.0364742	0.741438	0.968	1212	tags=39%, list=11%, signal=43%
NEURITE_DEVELOPMENT	32	0.528942	1.48553	0.0443787	0.722205	0.985	1212	tags=38%, list=11%, signal=42%
AXONOGENESIS	26	0.537775	1.48362	0.0521739	0.626828	0.986	1124	tags=38%, list=10%, signal=43%
TRANSFORMING_GROWTH_FACTOR_BETA_RECEPTOR_SIGNALING_PATHWAY	21	0.563129	1.45469	0.0612245	0.669719	0.996	312	tags=14%, list=3%, signal=15%
PROTEIN_POLYMERIZATION	15	0.617666	1.43905	0.0743802	0.656655	0.998	970	tags=20%, list=9%, signal=22%
CELL_CYCLE_ARREST_GO_0007050	46	0.462689	1.40345	0.0415225	0.739198	1	1017	tags=22%, list=9%, signal=24%
NEURON_DEVELOPMENT	35	0.495651	1.3748	0.0824373	0.794052	1	1212	tags=37%, list=11%, signal=42%
NITROGEN_COMPOUND_CATABOLIC_PROCESS	17	0.559527	1.34807	0.107042	0.84956	1	1865	tags=35%, list=17%, signal=42%
NEURON_DIFFERENTIATION	42	0.450396	1.33038	0.114907	0.867571	1	1212	tags=31%, list=11%, signal=35%
TRANSMEMBRANE_RECEPTOR_PROTEIN_SERINE_THREONINE_KINASE_SIGNALING_PATHWAY	29	0.474696	1.30823	0.130548	0.907424	1	800	tags=14%, list=7%, signal=15%
NEGATIVE_REGULATION_OF_CELLULAR_PROTEIN_METABOLIC_PROCESS	25	0.486634	1.30679	0.121037	0.853404	1	517	tags=12%, list=5%, signal=13%
REGULATION_OF_RESPONSE_TO_STIMULUS	17	0.539602	1.29763	0.148148	0.842077	1	1533	tags=35%, list=14%, signal=41%
NEGATIVE_REGULATION_OF_PROTEIN_METABOLIC_PROCESS	27	0.470311	1.28832	0.163142	0.833278	1	517	tags=11%, list=5%, signal=12%
ECTODERM_DEVELOPMENT	25	0.491521	1.27094	0.159218	0.859996	1	392	tags=16%, list=4%, signal=17%
AXON_GUIDANCE	16	0.516768	1.26281	0.176152	0.849476	1	892	tags=38%, list=8%, signal=41%
ELECTRON_TRANSPORT_GO_0006118	35	0.444459	1.25689	0.122449	0.830771	1	1993	tags=23%, list=18%, signal=28%
REGULATION_OF_CELL_PROLIFERATION	159	0.331243	1.25303	0.0310078	0.808176	1	960	tags=14%, list=9%, signal=15%
BASE_EXCISION_REPAIR	15	0.52039	1.2528	0.184915	0.772126	1	1642	tags=20%, list=15%, signal=23%
GOLGI_VESICLE_TRANSPORT	47	0.407228	1.24825	0.153025	0.754444	1	2099	tags=26%, list=19%, signal=31%
NEUROGENESIS	55	0.390782	1.23693	0.134058	0.764385	1	1212	tags=24%, list=11%, signal=26%
SULFUR_METABOLIC_PROCESS	27	0.444313	1.22943	0.20354	0.760836	1	2153	tags=48%, list=19%, signal=60%
PHOSPHORYLATION	207	0.315035	1.21299	0.0319149	0.791494	1	1678	tags=23%, list=15%, signal=26%
CELL_CYCLE_GO_0007049	265	0.308355	1.2089	0.0476191	0.778103	1	504	tags=7%, list=5%, signal=7%
GENERATION_OF_NEURONS	46	0.40398	1.20876	0.172881	0.750759	1	1212	tags=28%, list=11%, signal=32%
AMINE_CATABOLIC_PROCESS	15	0.511379	1.20652	0.235589	0.732518	1	1865	tags=33%, list=17%, signal=40%
POSITIVE_REGULATION_OF_CELL_PROLIFERATION	64	0.366801	1.18811	0.184	0.772668	1	943	tags=13%, list=9%, signal=14%
REGULATION_OF_TRANSLATIONAL_INITIATION	25	0.437518	1.1852	0.213873	0.758028	1	40	tags=4%, list=0%, signal=4%
REGULATION_OF_CELL_ADHESION	15	0.489507	1.17051	0.266667	0.78461	1	2239	tags=40%, list=20%, signal=50%
TRANSLATIONAL_INITIATION	32	0.403456	1.16169	0.210526	0.793185	1	40	tags=3%, list=0%, signal=3%
INSULIN_RECEPTOR_SIGNALING_PATHWAY	16	0.474234	1.15138	0.28	0.804954	1	1871	tags=44%, list=17%, signal=53%
POST_TRANSLATIONAL_PROTEIN_MODIFICATION	331	0.286813	1.13627	0.0735294	0.836313	1	1844	tags=21%, list=17%, signal=25%
NEGATIVE_REGULATION_OF_CELL_PROLIFERATION	88	0.335369	1.13546	0.172897	0.816038	1	960	tags=17%, list=9%, signal=19%
REGULATION_OF_ANATOMICAL_STRUCTURE_MORPHOGENESIS	15	0.473119	1.1288	0.308673	0.81758	1	951	tags=27%, list=9%, signal=29%
RESPONSE_TO_NUTRIENT_LEVELS	15	0.469868	1.12542	0.29703	0.808977	1	1758	tags=40%, list=16%, signal=47%
INTERPHASE_OF_MITOTIC_CELL_CYCLE	54	0.359536	1.11787	0.225926	0.816066	1	1749	tags=15%, list=16%, signal=18%
RESPONSE_TO_EXTRACELLULAR_STIMULUS	18	0.44971	1.11406	0.310345	0.808735	1	1758	tags=39%, list=16%, signal=46%
MYELOID_CELL_DIFFERENTIATION	20	0.440585	1.10828	0.329545	0.809369	1	2971	tags=50%, list=27%, signal=68%
PROTEIN_AMINO_ACID_PHOSPHORYLATION	182	0.29337	1.09562	0.256	0.835923	1	1678	tags=21%, list=15%, signal=25%
MICROTUBULE_ORGANIZING_CENTER_ORGANIZATION_AND_BIOGENESIS	15	0.458515	1.08769	0.347826	0.845022	1	1715	tags=27%, list=15%, signal=32%
TISSUE_DEVELOPMENT	49	0.355243	1.08357	0.314286	0.84114	1	410	tags=14%, list=4%, signal=15%
POSITIVE_REGULATION_OF_IMMUNE_SYSTEM_PROCESS	17	0.42709	1.07612	0.337017	0.84862	1	2050	tags=35%, list=19%, signal=43%
PROTEIN_AMINO_ACID_DEPHOSPHORYLATION	43	0.3564	1.06004	0.358156	0.890317	1	734	tags=16%, list=7%, signal=17%
MICROTUBULE_CYTOSKELETON_ORGANIZATION_AND_BIOGENESIS	35	0.369755	1.0594	0.338462	0.873771	1	1212	tags=17%, list=11%, signal=19%
POSITIVE_REGULATION_OF_DEVELOPMENTAL_PROCESS	135	0.286454	1.04843	0.322581	0.895506	1	1011	tags=13%, list=9%, signal=14%
JAK_STAT_CASCADE	17	0.418916	1.04629	0.375	0.884584	1	3044	tags=53%, list=27%, signal=73%
DEPHOSPHORYLATION	49	0.339932	1.04459	0.370909	0.873232	1	734	tags=16%, list=7%, signal=17%
REGULATION_OF_IMMUNE_SYSTEM_PROCESS	19	0.417511	1.04152	0.428969	0.866896	1	2050	tags=37%, list=19%, signal=45%
STEROID_METABOLIC_PROCESS	28	0.381313	1.03916	0.380814	0.858456	1	1008	tags=14%, list=9%, signal=16%
NEGATIVE_REGULATION_OF_CELLULAR_PROCESS	435	0.252126	1.03688	0.268293	0.850545	1	1036	tags=11%, list=9%, signal=12%
AMINO_ACID_METABOLIC_PROCESS	52	0.327887	1.02035	0.405694	0.893684	1	1865	tags=27%, list=17%, signal=32%
INTERPHASE	58	0.318744	1.02005	0.391129	0.878587	1	144	tags=3%, list=1%, signal=3%
NEGATIVE_REGULATION_OF_CELLULAR_COMPONENT_ORGANIZATION_AND_BIOGENESIS	23	0.380413	1.01494	0.414365	0.880948	1	40	tags=4%, list=0%, signal=4%
ONE_CARBON_COMPOUND_METABOLIC_PROCESS	22	0.397238	1.00003	0.465116	0.917224	1	628	tags=9%, list=6%, signal=10%
HISTONE_MODIFICATION	20	0.387655	0.99938	0.47181	0.903954	1	1209	tags=15%, list=11%, signal=17%
EPIDERMIS_DEVELOPMENT	19	0.393925	0.991182	0.462396	0.917617	1	366	tags=11%, list=3%, signal=11%
RESPONSE_TO_STRESS	311	0.246282	0.989849	0.566038	0.906391	1	1866	tags=17%, list=17%, signal=20%
PEPTIDYL_TYROSINE_MODIFICATION	15	0.41477	0.983241	0.468085	0.914473	1	1604	tags=33%, list=14%, signal=39%
NEGATIVE_REGULATION_OF_SIGNAL_TRANSDUCTION	22	0.380445	0.974356	0.473988	0.929492	1	472	tags=18%, list=4%, signal=19%
COVALENT_CHROMATIN_MODIFICATION	21	0.365269	0.959917	0.494505	0.965408	1	1209	tags=14%, list=11%, signal=16%
NEGATIVE_REGULATION_OF_BIOLOGICAL_PROCESS	447	0.2378	0.958699	0.666667	0.954566	1	1036	tags=11%, list=9%, signal=12%
REGULATION_OF_PHOSPHORYLATION	26	0.358362	0.956673	0.516667	0.946714	1	1677	tags=31%, list=15%, signal=36%
NEGATIVE_REGULATION_OF_TRANSFERASE_ACTIVITY	25	0.340148	0.945327	0.528902	0.970406	1	275	tags=8%, list=2%, signal=8%
VESICLE_MEDIATED_TRANSPORT	144	0.258818	0.942458	0.613924	0.965743	1	1006	tags=15%, list=9%, signal=16%
INTRACELLULAR_TRANSPORT	237	0.236757	0.935572	0.736842	0.973585	1	1140	tags=11%, list=10%, signal=12%
UBIQUITIN_CYCLE	42	0.302	0.90873	0.630509	1	1	2979	tags=33%, list=27%, signal=45%
AMINO_ACID_AND_DERIVATIVE_METABOLIC_PROCESS	67	0.284908	0.905954	0.665198	1	1	1865	tags=24%, list=17%, signal=29%
SECRETION_BY_CELL	79	0.269328	0.898645	0.683761	1	1	1941	tags=24%, list=18%, signal=29%
CELLULAR_MACROMOLECULE_CATABOLIC_PROCESS	83	0.268944	0.892936	0.671429	1	1	2584	tags=25%, list=23%, signal=33%
CELLULAR_RESPIRATION	17	0.364425	0.881357	0.616848	1	1	3262	tags=41%, list=29%, signal=58%
PROTEIN_PROCESSING	37	0.297492	0.878051	0.713816	1	1	1965	tags=30%, list=18%, signal=36%
RESPONSE_TO_DNA_DAMAGE_STIMULUS	138	0.238142	0.876624	0.841463	1	1	1864	tags=14%, list=17%, signal=17%
PROTEOLYSIS	120	0.241025	0.86754	0.797688	1	1	2239	tags=22%, list=20%, signal=27%
PROTEIN_RNA_COMPLEX_ASSEMBLY	58	0.272321	0.862811	0.73384	1	1	40	tags=2%, list=0%, signal=2%
PROTEIN_UBIQUITINATION	35	0.297192	0.862089	0.706625	1	1	1910	tags=20%, list=17%, signal=24%
ESTABLISHMENT_OF_CELLULAR_LOCALIZATION	276	0.222141	0.857113	0.955224	1	1	1746	tags=17%, list=16%, signal=19%
DNA_REPAIR	111	0.242976	0.854521	0.826347	1	1	1864	tags=14%, list=17%, signal=17%
ENERGY_DERIVATION_BY_OXIDATION_OF_ORGANIC_COMPOUNDS	29	0.303623	0.850274	0.700906	1	1	3262	tags=52%, list=29%, signal=73%
CELLULAR_LOCALIZATION	285	0.212318	0.847829	0.983607	1	1	1746	tags=16%, list=16%, signal=19%
PROTEIN_MODIFICATION_BY_SMALL_PROTEIN_CONJUGATION	38	0.289715	0.839931	0.776119	1	1	1910	tags=18%, list=17%, signal=22%
GLUCOSE_METABOLIC_PROCESS	20	0.322956	0.830799	0.697222	1	1	2325	tags=25%, list=21%, signal=32%
CYTOSKELETON_DEPENDENT_INTRACELLULAR_TRANSPORT	21	0.330049	0.829087	0.732394	1	1	2210	tags=33%, list=20%, signal=42%
NEGATIVE_REGULATION_OF_GROWTH	31	0.295818	0.825662	0.75	1	1	1677	tags=26%, list=15%, signal=30%
PROTEIN_AUTOPROCESSING	25	0.302464	0.817148	0.735294	1	1	1819	tags=32%, list=16%, signal=38%
PROTEIN_AMINO_ACID_AUTOPHOSPHORYLATION	25	0.302464	0.79168	0.76776	1	1	1819	tags=32%, list=16%, signal=38%
ER_NUCLEAR_SIGNALING_PATHWAY	15	0.326906	0.785087	0.77208	1	1	2448	tags=40%, list=22%, signal=51%
HOMEOSTASIS_OF_NUMBER_OF_CELLS	15	0.327715	0.780259	0.767624	1	1	2722	tags=33%, list=25%, signal=44%
ORGANELLE_LOCALIZATION	19	0.313251	0.773445	0.754667	1	1	3190	tags=42%, list=29%, signal=59%
PEROXISOME_ORGANIZATION_AND_BIOGENESIS	15	0.329416	0.770987	0.769437	1	1	2882	tags=40%, list=26%, signal=54%
REGULATION_OF_CELLULAR_PROTEIN_METABOLIC_PROCESS	93	0.226679	0.770436	0.921296	1	1	970	tags=9%, list=9%, signal=9%
CELLULAR_PROTEIN_CATABOLIC_PROCESS	53	0.248095	0.7675	0.876543	1	1	2867	tags=28%, list=26%, signal=38%
POSITIVE_REGULATION_OF_CELLULAR_COMPONENT_ORGANIZATION_AND_BIOGENESIS	24	0.292107	0.766184	0.844575	1	1	951	tags=13%, list=9%, signal=14%
REGULATION_OF_MITOTIC_CELL_CYCLE	17	0.307578	0.765528	0.762667	1	1	1479	tags=18%, list=13%, signal=20%
MITOTIC_CELL_CYCLE	130	0.207381	0.744968	0.993631	1	1	412	tags=3%, list=4%, signal=3%
RESPONSE_TO_ENDOGENOUS_STIMULUS	159	0.199413	0.743823	0.985185	1	1	1864	tags=14%, list=17%, signal=17%
REGULATION_OF_PROTEIN_METABOLIC_PROCESS	100	0.209877	0.722073	0.995	1	1	970	tags=8%, list=9%, signal=9%
RIBONUCLEOPROTEIN_COMPLEX_BIOGENESIS_AND_ASSEMBLY	75	0.208421	0.714039	0.960976	1	1	40	tags=1%, list=0%, signal=1%
REGULATION_OF_TRANSLATION	48	0.23389	0.710951	0.93633	1	1	40	tags=2%, list=0%, signal=2%
DNA_REPLICATION	86	0.206121	0.700512	0.963563	1	1	931	tags=6%, list=8%, signal=6%
PROTEIN_CATABOLIC_PROCESS	60	0.207702	0.670251	0.979839	1	1	2867	tags=27%, list=26%, signal=36%
NUCLEOTIDE_EXCISION_REPAIR	19	0.245205	0.626568	0.930667	1	1	1864	tags=21%, list=17%, signal=25%
NUCLEAR_TRANSPORT	75	0.185361	0.626072	1	1	1	1140	tags=11%, list=10%, signal=12%
AMINO_ACID_DERIVATIVE_METABOLIC_PROCESS	15	0.262111	0.62222	0.94335	1	1	3046	tags=33%, list=28%, signal=46%
SPLICEOSOME_ASSEMBLY	19	0.236161	0.608768	0.944904	1	1	8463	tags=100%, list=76%, signal=423%
PROTEIN_OLIGOMERIZATION	28	0.217505	0.589295	0.980057	1	1	1819	tags=21%, list=16%, signal=26%
POSITIVE_REGULATION_OF_CELLULAR_PROTEIN_METABOLIC_PROCESS	31	0.199784	0.559505	0.980769	1	1	2563	tags=26%, list=23%, signal=33%
POSITIVE_REGULATION_OF_PROTEIN_METABOLIC_PROCESS	32	0.189106	0.537007	0.99115	1	1	2563	tags=25%, list=23%, signal=32%
NUCLEAR_EXPORT	29	0.191991	0.535894	0.990683	1	1	2159	tags=17%, list=19%, signal=21%
REGULATION_OF_PROTEIN_MODIFICATION_PROCESS	25	0.193022	0.516806	0.991071	1	1	2827	tags=32%, list=26%, signal=43%
RNA_EXPORT_FROM_NUCLEUS	16	0.216927	0.514582	0.986979	1	1	8675	tags=100%, list=78%, signal=461%
PROTEIN_HOMOOLIGOMERIZATION	15	0.194567	0.466851	0.988796	1	1	3358	tags=47%, list=30%, signal=67%
CHROMATIN_ASSEMBLY	15	0.190506	0.455024	0.995037	1	1	8967	tags=100%, list=81%, signal=525%
POSITIVE_REGULATION_OF_BINDING	15	0.163638	0.382226	1	0.999726	1	1591	tags=13%, list=14%, signal=16%

## Sheet: combination_down
NAME	SIZE	ES	NES	NOM p-val	FDR q-val	FWER p-val	RANK AT MAX	LEADING EDGE
SECOND_MESSENGER_MEDIATED_SIGNALING	45	-0.734883	-1.84793	0	0.0118081	0.012	988	tags=33%, list=9%, signal=36%
G_PROTEIN_COUPLED_RECEPTOR_PROTEIN_SIGNALING_PATHWAY	98	-0.659396	-1.84223	0	0.00789566	0.016	995	tags=27%, list=9%, signal=29%
TRANSMISSION_OF_NERVE_IMPULSE	77	-0.67371	-1.80702	0	0.0115008	0.035	639	tags=21%, list=6%, signal=22%
SYNAPTIC_TRANSMISSION	69	-0.675871	-1.80625	0	0.00886312	0.036	1164	tags=28%, list=11%, signal=31%
G_PROTEIN_SIGNALING_COUPLED_TO_CYCLIC_NUCLEOTIDE_SECOND_MESSENGER	28	-0.770204	-1.80338	0.00138504	0.00788049	0.04	988	tags=39%, list=9%, signal=43%
CAMP_MEDIATED_SIGNALING	22	-0.79284	-1.79494	0	0.00868542	0.051	988	tags=45%, list=9%, signal=50%
CYCLIC_NUCLEOTIDE_MEDIATED_SIGNALING	30	-0.765502	-1.7881	0.00131406	0.00884744	0.061	988	tags=37%, list=9%, signal=40%
G_PROTEIN_SIGNALING_COUPLED_TO_CAMP_NUCLEOTIDE_SECOND_MESSENGER	21	-0.796366	-1.73623	0.00138889	0.0226269	0.169	988	tags=48%, list=9%, signal=52%
CELL_CELL_SIGNALING	133	-0.590323	-1.67211	0	0.0782007	0.501	1496	tags=29%, list=14%, signal=33%
NEUROLOGICAL_SYSTEM_PROCESS	137	-0.57411	-1.63608	0	0.122583	0.691	1496	tags=24%, list=14%, signal=28%
POSITIVE_REGULATION_OF_MAP_KINASE_ACTIVITY	31	-0.679916	-1.59992	0.00909091	0.188808	0.873	968	tags=35%, list=9%, signal=39%
ION_HOMEOSTASIS	50	-0.625408	-1.5923	0.00498132	0.192048	0.896	1073	tags=20%, list=10%, signal=22%
SYSTEM_PROCESS	201	-0.541165	-1.59208	0.00105263	0.177579	0.897	1221	tags=22%, list=11%, signal=24%
REGULATION_OF_CELL_MIGRATION	15	-0.756514	-1.57308	0.0145138	0.212809	0.941	383	tags=20%, list=3%, signal=21%
EXOCYTOSIS	15	-0.749951	-1.55954	0.0173661	0.232897	0.962	1136	tags=33%, list=10%, signal=37%
CELL_SURFACE_RECEPTOR_LINKED_SIGNAL_TRANSDUCTION_GO_0007166	250	-0.52594	-1.5574	0	0.223874	0.963	1242	tags=22%, list=11%, signal=25%
IMMUNE_RESPONSE	63	-0.591674	-1.55692	0.00720288	0.211689	0.964	1432	tags=25%, list=13%, signal=29%
BRAIN_DEVELOPMENT	34	-0.637065	-1.54957	0.0191327	0.217459	0.972	2039	tags=38%, list=18%, signal=47%
CHEMICAL_HOMEOSTASIS	62	-0.576144	-1.52769	0.0121803	0.266663	0.994	1073	tags=16%, list=10%, signal=18%
POSITIVE_REGULATION_OF_CATALYTIC_ACTIVITY	100	-0.543785	-1.52361	0.00808314	0.265913	0.994	1967	tags=36%, list=18%, signal=43%
CELLULAR_CATION_HOMEOSTASIS	40	-0.614069	-1.51851	0.0151324	0.26743	0.996	1073	tags=23%, list=10%, signal=25%
RESPONSE_TO_OTHER_ORGANISM	24	-0.660208	-1.51596	0.029703	0.263212	0.999	666	tags=17%, list=6%, signal=18%
STRIATED_MUSCLE_DEVELOPMENT	24	-0.651907	-1.51361	0.0378682	0.2579	0.999	1067	tags=21%, list=10%, signal=23%
ACTIVATION_OF_MAPK_ACTIVITY	26	-0.651913	-1.51002	0.0189189	0.258173	0.999	1222	tags=35%, list=11%, signal=39%
CELLULAR_HOMEOSTASIS	60	-0.576115	-1.5064	0.0145985	0.257028	0.999	1073	tags=17%, list=10%, signal=18%
REGULATION_OF_MAP_KINASE_ACTIVITY	45	-0.601962	-1.50627	0.0297398	0.247596	0.999	968	tags=29%, list=9%, signal=32%
CATION_HOMEOSTASIS	41	-0.595106	-1.48581	0.0235602	0.293627	1	1073	tags=22%, list=10%, signal=24%
DNA_CATABOLIC_PROCESS	21	-0.657794	-1.47992	0.0396601	0.30015	1	1835	tags=33%, list=17%, signal=40%
CELLULAR_COMPONENT_DISASSEMBLY	28	-0.629988	-1.47643	0.046133	0.299966	1	1767	tags=29%, list=16%, signal=34%
RESPONSE_TO_VIRUS	19	-0.692984	-1.4695	0.0445104	0.309581	1	666	tags=21%, list=6%, signal=22%
BEHAVIOR	39	-0.583355	-1.45182	0.0495437	0.356646	1	589	tags=18%, list=5%, signal=19%
APOPTOTIC_NUCLEAR_CHANGES	18	-0.666539	-1.45116	0.0634921	0.347505	1	1767	tags=28%, list=16%, signal=33%
REGULATION_OF_JNK_ACTIVITY	15	-0.680227	-1.42981	0.0835866	0.407727	1	1726	tags=47%, list=16%, signal=55%
CELL_STRUCTURE_DISASSEMBLY_DURING_APOPTOSIS	15	-0.669277	-1.42934	0.0771429	0.397555	1	1767	tags=33%, list=16%, signal=40%
SKELETAL_MUSCLE_DEVELOPMENT	16	-0.675328	-1.42233	0.0634697	0.408783	1	1067	tags=19%, list=10%, signal=21%
POSITIVE_REGULATION_OF_TRANSFERASE_ACTIVITY	56	-0.536806	-1.41415	0.0412621	0.425772	1	1222	tags=29%, list=11%, signal=32%
REGULATION_OF_TRANSPORT	36	-0.5834	-1.41179	0.0605263	0.422331	1	1166	tags=22%, list=11%, signal=25%
CELL_CELL_ADHESION	35	-0.585403	-1.41145	0.0601307	0.412725	1	1384	tags=26%, list=12%, signal=29%
IMMUNE_SYSTEM_PROCESS	109	-0.506317	-1.39876	0.0303371	0.446674	1	1461	tags=20%, list=13%, signal=23%
PATTERN_SPECIFICATION_PROCESS	22	-0.611857	-1.39699	0.0862069	0.441682	1	896	tags=27%, list=8%, signal=30%
SPHINGOLIPID_METABOLIC_PROCESS	20	-0.634137	-1.39661	0.0729927	0.432764	1	1743	tags=35%, list=16%, signal=41%
RESPONSE_TO_BIOTIC_STIMULUS	50	-0.543226	-1.38876	0.0573248	0.449799	1	666	tags=12%, list=6%, signal=13%
MONOVALENT_INORGANIC_CATION_TRANSPORT	27	-0.589211	-1.38662	0.0847682	0.447094	1	1604	tags=41%, list=14%, signal=48%
MULTI_ORGANISM_PROCESS	48	-0.537363	-1.37476	0.0670807	0.481125	1	1669	tags=21%, list=15%, signal=24%
ANATOMICAL_STRUCTURE_FORMATION	28	-0.582649	-1.36438	0.082777	0.509221	1	593	tags=21%, list=5%, signal=23%
MEMBRANE_LIPID_BIOSYNTHETIC_PROCESS	38	-0.545337	-1.36395	0.0900662	0.499614	1	1749	tags=24%, list=16%, signal=28%
NUCLEOTIDE_METABOLIC_PROCESS	27	-0.586832	-1.35386	0.0896552	0.5286	1	1179	tags=15%, list=11%, signal=17%
REGULATION_OF_INTRACELLULAR_TRANSPORT	16	-0.630848	-1.34683	0.132756	0.546245	1	949	tags=19%, list=9%, signal=20%
I_KAPPAB_KINASE_NF_KAPPAB_CASCADE	81	-0.491764	-1.34243	0.0664376	0.552764	1	1102	tags=19%, list=10%, signal=20%
REGULATION_OF_NUCLEOCYTOPLASMIC_TRANSPORT	16	-0.630848	-1.33848	0.114826	0.556487	1	949	tags=19%, list=9%, signal=20%
CELL_ACTIVATION	19	-0.601608	-1.33732	0.123755	0.550852	1	1448	tags=21%, list=13%, signal=24%
LEUKOCYTE_ACTIVATION	19	-0.601608	-1.33476	0.134006	0.550157	1	1448	tags=21%, list=13%, signal=24%
POSITIVE_REGULATION_OF_TRANSCRIPTIONDNA_DEPENDENT	89	-0.484217	-1.33044	0.0690449	0.557978	1	1271	tags=18%, list=11%, signal=20%
ORGANIC_ACID_TRANSPORT	25	-0.577213	-1.32552	0.144429	0.567313	1	1496	tags=36%, list=14%, signal=42%
AMINE_TRANSPORT	23	-0.575431	-1.32481	0.137447	0.559867	1	1496	tags=35%, list=14%, signal=40%
LYMPHOCYTE_ACTIVATION	18	-0.60779	-1.32408	0.145646	0.552931	1	1448	tags=22%, list=13%, signal=26%
JNK_CASCADE	37	-0.530421	-1.32402	0.113111	0.543541	1	1726	tags=32%, list=16%, signal=38%
CARBOXYLIC_ACID_TRANSPORT	25	-0.577213	-1.3218	0.123474	0.542861	1	1496	tags=36%, list=14%, signal=42%
POSITIVE_REGULATION_OF_TRANSCRIPTION_FROM_RNA_POLYMERASE_II_PROMOTER	52	-0.510771	-1.3212	0.0938673	0.535765	1	1271	tags=21%, list=11%, signal=24%
MUSCLE_DEVELOPMENT	48	-0.517099	-1.31838	0.109091	0.537702	1	1067	tags=17%, list=10%, signal=18%
INDUCTION_OF_APOPTOSIS_BY_EXTRACELLULAR_SIGNALS	19	-0.612723	-1.31822	0.130194	0.529466	1	2156	tags=32%, list=19%, signal=39%
AMINO_ACID_TRANSPORT	19	-0.587094	-1.30914	0.138374	0.553856	1	1496	tags=37%, list=14%, signal=43%
POSITIVE_REGULATION_OF_I_KAPPAB_KINASE_NF_KAPPAB_CASCADE	64	-0.499752	-1.30829	0.0785973	0.548068	1	1102	tags=19%, list=10%, signal=21%
REGULATION_OF_CYTOSKELETON_ORGANIZATION_AND_BIOGENESIS	27	-0.56156	-1.30803	0.135989	0.540166	1	1076	tags=22%, list=10%, signal=25%
BIOSYNTHETIC_PROCESS	324	-0.431731	-1.29974	0.027551	0.561693	1	1749	tags=17%, list=16%, signal=19%
POSITIVE_REGULATION_OF_TRANSCRIPTION	108	-0.466511	-1.2995	0.0677778	0.554332	1	1271	tags=18%, list=11%, signal=20%
GLYCOPROTEIN_BIOSYNTHETIC_PROCESS	54	-0.50547	-1.29709	0.116931	0.554981	1	1735	tags=30%, list=16%, signal=35%
INTRACELLULAR_RECEPTOR_MEDIATED_SIGNALING_PATHWAY	17	-0.601816	-1.29334	0.140805	0.560432	1	2232	tags=35%, list=20%, signal=44%
TRANSCRIPTION_INITIATION	35	-0.529099	-1.29327	0.126498	0.55244	1	2106	tags=26%, list=19%, signal=32%
CELL_MIGRATION	49	-0.509203	-1.29125	0.143204	0.551637	1	430	tags=12%, list=4%, signal=13%
ORGAN_MORPHOGENESIS	73	-0.477196	-1.28887	0.105077	0.552744	1	1021	tags=18%, list=9%, signal=19%
APOPTOTIC_PROGRAM	44	-0.522907	-1.28845	0.131926	0.546618	1	1767	tags=23%, list=16%, signal=27%
STEROID_HORMONE_RECEPTOR_SIGNALING_PATHWAY	17	-0.601816	-1.2828	0.17991	0.559215	1	2232	tags=35%, list=20%, signal=44%
STRESS_ACTIVATED_PROTEIN_KINASE_SIGNALING_PATHWAY	39	-0.519962	-1.2827	0.148005	0.552044	1	1726	tags=31%, list=16%, signal=36%
MEMBRANE_LIPID_METABOLIC_PROCESS	67	-0.483662	-1.28065	0.111905	0.552197	1	1749	tags=24%, list=16%, signal=28%
NUCLEAR_ORGANIZATION_AND_BIOGENESIS	23	-0.56214	-1.28006	0.169811	0.547026	1	1767	tags=22%, list=16%, signal=26%
ANGIOGENESIS	21	-0.56717	-1.27819	0.163585	0.546699	1	1006	tags=19%, list=9%, signal=21%
HOMEOSTATIC_PROCESS	95	-0.462003	-1.2768	0.0806818	0.544646	1	348	tags=7%, list=3%, signal=8%
GLYCOPROTEIN_METABOLIC_PROCESS	68	-0.470027	-1.26693	0.125741	0.57308	1	1735	tags=28%, list=16%, signal=33%
REGULATION_OF_I_KAPPAB_KINASE_NF_KAPPAB_CASCADE	67	-0.471829	-1.26674	0.126021	0.566505	1	1331	tags=19%, list=12%, signal=22%
EMBRYONIC_DEVELOPMENT	40	-0.515377	-1.26506	0.148579	0.565271	1	1721	tags=30%, list=16%, signal=35%
VASCULATURE_DEVELOPMENT	26	-0.552951	-1.26496	0.179632	0.558678	1	1006	tags=19%, list=9%, signal=21%
NUCLEOBASENUCLEOSIDE_AND_NUCLEOTIDE_METABOLIC_PROCESS	35	-0.52267	-1.2641	0.157552	0.55511	1	1179	tags=14%, list=11%, signal=16%
POSITIVE_REGULATION_OF_RNA_METABOLIC_PROCESS	91	-0.46523	-1.26372	0.119101	0.549791	1	1271	tags=18%, list=11%, signal=20%
POSITIVE_REGULATION_OF_NUCLEOBASENUCLEOSIDENUCLEOTIDE_AND_NUCLEIC_ACID_METABOLIC_PROCESS	114	-0.447293	-1.25935	0.106502	0.559076	1	1271	tags=17%, list=11%, signal=19%
LIPID_BIOSYNTHETIC_PROCESS	65	-0.469224	-1.25812	0.138518	0.556716	1	1749	tags=18%, list=16%, signal=22%
PROTEIN_DNA_COMPLEX_ASSEMBLY	48	-0.495159	-1.25475	0.139098	0.562259	1	2106	tags=23%, list=19%, signal=28%
TRANSCRIPTION_INITIATION_FROM_RNA_POLYMERASE_II_PROMOTER	29	-0.531557	-1.25127	0.20323	0.568032	1	1266	tags=17%, list=11%, signal=19%
SYSTEM_DEVELOPMENT	418	-0.413719	-1.24487	0.029029	0.583437	1	1413	tags=19%, list=13%, signal=21%
CENTRAL_NERVOUS_SYSTEM_DEVELOPMENT	77	-0.460818	-1.24159	0.149708	0.588252	1	1647	tags=29%, list=15%, signal=33%
NERVOUS_SYSTEM_DEVELOPMENT	216	-0.421574	-1.24111	0.0669413	0.583531	1	1721	tags=25%, list=16%, signal=29%
ION_TRANSPORT	60	-0.472872	-1.24045	0.151149	0.579626	1	1634	tags=25%, list=15%, signal=29%
ORGAN_DEVELOPMENT	266	-0.414475	-1.2365	0.0650155	0.588137	1	1533	tags=18%, list=14%, signal=20%
SKELETAL_DEVELOPMENT	48	-0.481001	-1.23252	0.184524	0.595891	1	1533	tags=25%, list=14%, signal=29%
REGULATION_OF_ORGANELLE_ORGANIZATION_AND_BIOGENESIS	37	-0.502925	-1.22768	0.197436	0.606311	1	1076	tags=19%, list=10%, signal=21%
INTRACELLULAR_SIGNALING_CASCADE	408	-0.405401	-1.22684	0.0392749	0.602988	1	1878	tags=21%, list=17%, signal=24%
CELLULAR_LIPID_CATABOLIC_PROCESS	20	-0.551967	-1.22427	0.221906	0.605682	1	1458	tags=30%, list=13%, signal=34%
FATTY_ACID_METABOLIC_PROCESS	35	-0.505617	-1.2197	0.214096	0.615243	1	1321	tags=20%, list=12%, signal=23%
POSITIVE_REGULATION_OF_HYDROLASE_ACTIVITY	28	-0.508008	-1.21817	0.225033	0.61446	1	1967	tags=32%, list=18%, signal=39%
POSITIVE_REGULATION_OF_MULTICELLULAR_ORGANISMAL_PROCESS	20	-0.554977	-1.21708	0.227336	0.611974	1	13	tags=5%, list=0%, signal=5%
LIPID_CATABOLIC_PROCESS	21	-0.539543	-1.21703	0.227654	0.605983	1	1458	tags=29%, list=13%, signal=33%
REGULATION_OF_G_PROTEIN_COUPLED_RECEPTOR_PROTEIN_SIGNALING_PATHWAY	16	-0.567802	-1.19632	0.267071	0.674231	1	1146	tags=38%, list=10%, signal=42%
CATION_TRANSPORT	47	-0.466444	-1.19014	0.223077	0.690653	1	1634	tags=28%, list=15%, signal=32%
CARBOHYDRATE_BIOSYNTHETIC_PROCESS	35	-0.490105	-1.18753	0.223822	0.693915	1	1022	tags=14%, list=9%, signal=16%
NEGATIVE_REGULATION_OF_DEVELOPMENTAL_PROCESS	123	-0.419981	-1.18752	0.172717	0.687326	1	1384	tags=16%, list=12%, signal=18%
REGULATION_OF_MULTICELLULAR_ORGANISMAL_PROCESS	44	-0.47145	-1.18701	0.229529	0.682815	1	1448	tags=23%, list=13%, signal=26%
PROTEIN_AMINO_ACID_N_LINKED_GLYCOSYLATION	22	-0.520866	-1.18387	0.262341	0.687919	1	1633	tags=27%, list=15%, signal=32%
REGULATION_OF_BIOLOGICAL_QUALITY	204	-0.404965	-1.18312	0.14834	0.684576	1	1496	tags=15%, list=14%, signal=17%
PROTEIN_KINASE_CASCADE	198	-0.409108	-1.18009	0.150728	0.689273	1	1003	tags=15%, list=9%, signal=16%
MAPKKK_CASCADE_GO_0000165	73	-0.434835	-1.17645	0.217799	0.696607	1	968	tags=18%, list=9%, signal=19%
METAL_ION_TRANSPORT	33	-0.494504	-1.17254	0.253045	0.704544	1	1604	tags=36%, list=14%, signal=42%
RECEPTOR_MEDIATED_ENDOCYTOSIS	18	-0.536973	-1.17241	0.269341	0.698719	1	1073	tags=28%, list=10%, signal=31%
DNA_PACKAGING	28	-0.501113	-1.17204	0.252033	0.693788	1	2902	tags=29%, list=26%, signal=39%
MACROMOLECULE_BIOSYNTHETIC_PROCESS	220	-0.399077	-1.17157	0.148958	0.689071	1	1749	tags=16%, list=16%, signal=19%
REGULATION_OF_CATALYTIC_ACTIVITY	183	-0.396708	-1.17117	0.16457	0.684585	1	1967	tags=26%, list=18%, signal=31%
SISTER_CHROMATID_SEGREGATION	16	-0.536855	-1.16759	0.278736	0.691303	1	3885	tags=44%, list=35%, signal=67%
MEMBRANE_ORGANIZATION_AND_BIOGENESIS	88	-0.425629	-1.1634	0.231039	0.700369	1	1166	tags=17%, list=11%, signal=19%
MITOTIC_SISTER_CHROMATID_SEGREGATION	15	-0.555597	-1.15632	0.297744	0.720079	1	3885	tags=47%, list=35%, signal=72%
POSITIVE_REGULATION_OF_METABOLIC_PROCESS	151	-0.401755	-1.15374	0.211039	0.723639	1	2097	tags=21%, list=19%, signal=26%
POSITIVE_REGULATION_OF_CELLULAR_METABOLIC_PROCESS	148	-0.40506	-1.15096	0.211663	0.727615	1	2097	tags=22%, list=19%, signal=26%
NEGATIVE_REGULATION_OF_PROGRAMMED_CELL_DEATH	103	-0.405731	-1.14645	0.232768	0.737862	1	1284	tags=16%, list=12%, signal=17%
MITOCHONDRIAL_TRANSPORT	21	-0.510755	-1.13811	0.317212	0.763342	1	262	tags=10%, list=2%, signal=10%
NITROGEN_COMPOUND_BIOSYNTHETIC_PROCESS	21	-0.521162	-1.13701	0.325069	0.761245	1	1651	tags=33%, list=15%, signal=39%
REGULATION_OF_MOLECULAR_FUNCTION	214	-0.385852	-1.13216	0.212656	0.772496	1	1967	tags=24%, list=18%, signal=29%
RESPONSE_TO_LIGHT_STIMULUS	27	-0.48198	-1.12789	0.309293	0.782779	1	603	tags=11%, list=5%, signal=12%
TRANSCRIPTION_FROM_RNA_POLYMERASE_II_PROMOTER	363	-0.374143	-1.12576	0.173737	0.784606	1	1742	tags=16%, list=16%, signal=19%
CARBOHYDRATE_METABOLIC_PROCESS	117	-0.393553	-1.12472	0.274531	0.782465	1	1853	tags=20%, list=17%, signal=23%
REPRODUCTIVE_PROCESS	57	-0.425346	-1.12392	0.3	0.779307	1	2304	tags=26%, list=21%, signal=33%
COFACTOR_METABOLIC_PROCESS	42	-0.444151	-1.12219	0.299355	0.779704	1	1401	tags=17%, list=13%, signal=19%
DEFENSE_RESPONSE	66	-0.42521	-1.1214	0.27771	0.776986	1	1232	tags=18%, list=11%, signal=20%
TRANSMEMBRANE_RECEPTOR_PROTEIN_TYROSINE_KINASE_SIGNALING_PATHWAY	44	-0.440651	-1.11707	0.302799	0.787025	1	383	tags=9%, list=3%, signal=9%
CELLULAR_BIOSYNTHETIC_PROCESS	219	-0.379897	-1.11435	0.23668	0.791492	1	1675	tags=14%, list=15%, signal=16%
ANATOMICAL_STRUCTURE_MORPHOGENESIS	210	-0.375005	-1.10774	0.278638	0.809682	1	1595	tags=21%, list=14%, signal=25%
ANTI_APOPTOSIS	84	-0.404658	-1.10211	0.313886	0.824592	1	1284	tags=14%, list=12%, signal=16%
CELLULAR_LIPID_METABOLIC_PROCESS	142	-0.38857	-1.09666	0.307359	0.838405	1	1749	tags=23%, list=16%, signal=26%
RESPONSE_TO_ORGANIC_SUBSTANCE	17	-0.506968	-1.0957	0.360061	0.835706	1	884	tags=12%, list=8%, signal=13%
NEGATIVE_REGULATION_OF_APOPTOSIS	102	-0.394217	-1.09497	0.314543	0.832165	1	1284	tags=15%, list=12%, signal=16%
LIPID_METABOLIC_PROCESS	180	-0.379138	-1.09408	0.29704	0.829185	1	1749	tags=22%, list=16%, signal=25%
REPRODUCTION	97	-0.391733	-1.09111	0.31946	0.834089	1	2331	tags=24%, list=21%, signal=30%
CHROMATIN_ASSEMBLY_OR_DISASSEMBLY	25	-0.476485	-1.08607	0.381429	0.846326	1	2902	tags=40%, list=26%, signal=54%
COFACTOR_BIOSYNTHETIC_PROCESS	20	-0.490622	-1.07973	0.389121	0.864039	1	1401	tags=25%, list=13%, signal=29%
POSITIVE_REGULATION_OF_CASPASE_ACTIVITY	19	-0.490822	-1.07351	0.382646	0.881058	1	1767	tags=26%, list=16%, signal=31%
MEIOTIC_CELL_CYCLE	23	-0.469414	-1.07296	0.386427	0.876975	1	778	tags=9%, list=7%, signal=9%
TRANSCRIPTION_DNA_DEPENDENT	492	-0.357462	-1.07278	0.270624	0.871582	1	2330	tags=20%, list=21%, signal=25%
CELLULAR_PROTEIN_COMPLEX_ASSEMBLY	22	-0.48194	-1.07218	0.383191	0.867786	1	1813	tags=18%, list=16%, signal=22%
RNA_BIOSYNTHETIC_PROCESS	494	-0.356536	-1.07048	0.293882	0.868303	1	2330	tags=20%, list=21%, signal=24%
RESPONSE_TO_EXTERNAL_STIMULUS	99	-0.387252	-1.06941	0.357461	0.866165	1	1461	tags=22%, list=13%, signal=25%
REGULATION_OF_TRANSCRIPTION_FROM_RNA_POLYMERASE_II_PROMOTER	228	-0.361934	-1.06013	0.369183	0.893538	1	1742	tags=16%, list=16%, signal=18%
RESPONSE_TO_RADIATION	38	-0.435242	-1.06013	0.383375	0.887554	1	1692	tags=18%, list=15%, signal=22%
REGULATION_OF_TRANSCRIPTIONDNA_DEPENDENT	349	-0.353884	-1.05935	0.337374	0.884353	1	2039	tags=17%, list=18%, signal=21%
SEXUAL_REPRODUCTION	51	-0.41159	-1.05801	0.396364	0.883592	1	1774	tags=18%, list=16%, signal=21%
REGULATION_OF_KINASE_ACTIVITY	116	-0.371382	-1.05519	0.394708	0.887547	1	1222	tags=18%, list=11%, signal=20%
SECONDARY_METABOLIC_PROCESS	17	-0.479705	-1.05207	0.415094	0.893104	1	1401	tags=18%, list=13%, signal=20%
REGULATION_OF_PROTEIN_KINASE_ACTIVITY	114	-0.37412	-1.05195	0.379272	0.887777	1	1222	tags=18%, list=11%, signal=20%
CELL_DEVELOPMENT	360	-0.350331	-1.04891	0.363083	0.892979	1	1767	tags=16%, list=16%, signal=19%
MONOCARBOXYLIC_ACID_METABOLIC_PROCESS	43	-0.417165	-1.04238	0.40824	0.91107	1	1321	tags=16%, list=12%, signal=18%
REGULATION_OF_TRANSFERASE_ACTIVITY	119	-0.368455	-1.04031	0.406593	0.912097	1	1222	tags=18%, list=11%, signal=21%
REGULATION_OF_RNA_METABOLIC_PROCESS	356	-0.345558	-1.03979	0.40568	0.908181	1	2039	tags=17%, list=18%, signal=20%
SENSORY_PERCEPTION	61	-0.387483	-1.03851	0.406326	0.906677	1	990	tags=13%, list=9%, signal=14%
DNA_RECOMBINATION	35	-0.427244	-1.03823	0.417969	0.90193	1	61	tags=3%, list=1%, signal=3%
HEART_DEVELOPMENT	20	-0.468741	-1.03392	0.439768	0.91131	1	2950	tags=65%, list=27%, signal=88%
REGULATION_OF_TRANSCRIPTION	426	-0.339059	-1.02435	0.420523	0.939362	1	2108	tags=18%, list=19%, signal=21%
NUCLEOBASENUCLEOSIDENUCLEOTIDE_AND_NUCLEIC_ACID_TRANSPORT	21	-0.452351	-1.01546	0.465659	0.964465	1	187	tags=5%, list=2%, signal=5%
NEGATIVE_REGULATION_OF_CATALYTIC_ACTIVITY	43	-0.400607	-1.01308	0.48481	0.966726	1	928	tags=14%, list=8%, signal=15%
LOCOMOTORY_BEHAVIOR	22	-0.459037	-1.01234	0.472678	0.963358	1	1461	tags=27%, list=13%, signal=31%
POSITIVE_REGULATION_OF_BIOLOGICAL_PROCESS	424	-0.337304	-1.01086	0.473843	0.962688	1	1331	tags=13%, list=12%, signal=14%
DNA_INTEGRITY_CHECKPOINT	21	-0.451377	-1.0054	0.492978	0.975051	1	3227	tags=48%, list=29%, signal=67%
PROGRAMMED_CELL_DEATH	284	-0.33506	-1.00071	0.492339	0.985278	1	1767	tags=16%, list=16%, signal=19%
REGULATION_OF_GENE_EXPRESSION	486	-0.333527	-0.998162	0.512538	0.987779	1	2108	tags=17%, list=19%, signal=21%
CHROMOSOME_SEGREGATION	31	-0.416213	-0.99481	0.508387	0.993819	1	3632	tags=35%, list=33%, signal=53%
ACTIN_FILAMENT_ORGANIZATION	17	-0.460911	-0.993899	0.497771	0.991093	1	1076	tags=24%, list=10%, signal=26%
REGULATION_OF_DEVELOPMENTAL_PROCESS	280	-0.33272	-0.992538	0.524053	0.989682	1	1603	tags=16%, list=14%, signal=18%
REGULATION_OF_NUCLEOBASENUCLEOSIDENUCLEOTIDE_AND_NUCLEIC_ACID_METABOLIC_PROCESS	466	-0.327887	-0.991755	0.515641	0.986513	1	2108	tags=17%, list=19%, signal=20%
RESPONSE_TO_ABIOTIC_STIMULUS	56	-0.379559	-0.991715	0.487624	0.980995	1	1692	tags=16%, list=15%, signal=19%
CASPASE_ACTIVATION	17	-0.449601	-0.984464	0.506475	0.999343	1	949	tags=12%, list=9%, signal=13%
CELLULAR_COMPONENT_ASSEMBLY	232	-0.335921	-0.984156	0.529106	0.994591	1	2106	tags=16%, list=19%, signal=20%
ACTIN_CYTOSKELETON_ORGANIZATION_AND_BIOGENESIS	75	-0.366293	-0.981579	0.532014	0.997472	1	1282	tags=15%, list=12%, signal=16%
CHROMOSOME_ORGANIZATION_AND_BIOGENESIS	109	-0.347889	-0.980296	0.509737	0.99586	1	2995	tags=27%, list=27%, signal=36%
SMALL_GTPASE_MEDIATED_SIGNAL_TRANSDUCTION	56	-0.377368	-0.977572	0.52381	0.998973	1	1439	tags=20%, list=13%, signal=22%
POSITIVE_REGULATION_OF_CELLULAR_PROCESS	412	-0.326545	-0.977407	0.564386	0.993946	1	1271	tags=13%, list=11%, signal=14%
APOPTOSIS_GO	283	-0.330195	-0.973908	0.561728	0.999637	1	1767	tags=16%, list=16%, signal=18%
REGULATION_OF_PROGRAMMED_CELL_DEATH	226	-0.327256	-0.972725	0.533679	0.997882	1	1767	tags=16%, list=16%, signal=19%
PROTEIN_COMPLEX_ASSEMBLY	118	-0.344302	-0.970738	0.54775	0.998688	1	2097	tags=19%, list=19%, signal=23%
RESPONSE_TO_UV	17	-0.458563	-0.968891	0.541907	0.998879	1	603	tags=12%, list=5%, signal=12%
MACROMOLECULAR_COMPLEX_ASSEMBLY	221	-0.329276	-0.968757	0.562694	0.993963	1	2106	tags=16%, list=19%, signal=19%
NEGATIVE_REGULATION_OF_TRANSCRIPTION_FROM_RNA_POLYMERASE_II_PROMOTER	63	-0.363776	-0.966125	0.541274	0.996421	1	2001	tags=22%, list=18%, signal=27%
TRANSPORT	481	-0.320743	-0.965193	0.620621	0.993992	1	1938	tags=16%, list=17%, signal=19%
LIPOPROTEIN_METABOLIC_PROCESS	22	-0.421614	-0.96241	0.523745	0.997476	1	1929	tags=27%, list=17%, signal=33%
RESPONSE_TO_CHEMICAL_STIMULUS	154	-0.330959	-0.954958	0.569579	1	1	1054	tags=13%, list=10%, signal=14%
POSITIVE_REGULATION_OF_SIGNAL_TRANSDUCTION	80	-0.350558	-0.954822	0.564815	1	1	1102	tags=16%, list=10%, signal=18%
ORGANELLE_ORGANIZATION_AND_BIOGENESIS	394	-0.315894	-0.953947	0.634343	1	1	2753	tags=22%, list=25%, signal=29%
SECRETION	96	-0.340865	-0.951488	0.564773	1	1	1331	tags=13%, list=12%, signal=14%
CYTOSKELETON_ORGANIZATION_AND_BIOGENESIS	160	-0.329169	-0.949939	0.58811	1	1	1342	tags=11%, list=12%, signal=13%
REGULATION_OF_APOPTOSIS	225	-0.320976	-0.947414	0.618802	1	1	1767	tags=16%, list=16%, signal=19%
REGULATION_OF_CELLULAR_COMPONENT_ORGANIZATION_AND_BIOGENESIS	97	-0.341288	-0.947334	0.572228	1	1	1896	tags=19%, list=17%, signal=22%
NEGATIVE_REGULATION_OF_RNA_METABOLIC_PROCESS	102	-0.339269	-0.944928	0.573171	1	1	2970	tags=34%, list=27%, signal=46%
REGULATION_OF_SIGNAL_TRANSDUCTION	140	-0.330197	-0.943174	0.606325	1	1	1331	tags=18%, list=12%, signal=20%
NEGATIVE_REGULATION_OF_TRANSCRIPTION_DNA_DEPENDENT	101	-0.336653	-0.943117	0.589165	1	1	2970	tags=34%, list=27%, signal=46%
GAMETE_GENERATION	46	-0.371038	-0.937768	0.593393	1	1	1672	tags=13%, list=15%, signal=15%
ACTIN_FILAMENT_BASED_PROCESS	80	-0.34793	-0.934217	0.609871	1	1	1282	tags=14%, list=12%, signal=15%
CELL_PROJECTION_BIOGENESIS	18	-0.429934	-0.932261	0.574022	1	1	1282	tags=22%, list=12%, signal=25%
AROMATIC_COMPOUND_METABOLIC_PROCESS	17	-0.436736	-0.930617	0.581921	1	1	1343	tags=24%, list=12%, signal=27%
DNA_DAMAGE_CHECKPOINT	17	-0.430609	-0.928536	0.569444	1	1	3034	tags=41%, list=27%, signal=57%
RAS_PROTEIN_SIGNAL_TRANSDUCTION	39	-0.375582	-0.92767	0.572368	1	1	1282	tags=18%, list=12%, signal=20%
PHOSPHOLIPID_BIOSYNTHETIC_PROCESS	32	-0.388744	-0.925117	0.602362	1	1	1749	tags=19%, list=16%, signal=22%
MITOCHONDRION_ORGANIZATION_AND_BIOGENESIS	44	-0.368721	-0.919915	0.605793	1	1	2882	tags=30%, list=26%, signal=40%
GLYCEROPHOSPHOLIPID_BIOSYNTHETIC_PROCESS	24	-0.405401	-0.913016	0.595041	1	1	1749	tags=21%, list=16%, signal=25%
REGULATION_OF_DNA_REPLICATION	17	-0.431273	-0.912837	0.586705	1	1	3702	tags=47%, list=33%, signal=71%
INDUCTION_OF_APOPTOSIS_BY_INTRACELLULAR_SIGNALS	17	-0.430958	-0.912555	0.610947	1	1	3803	tags=53%, list=34%, signal=81%
REGULATION_OF_HYDROLASE_ACTIVITY	44	-0.361711	-0.910709	0.594771	1	1	1967	tags=25%, list=18%, signal=30%
ACTIN_POLYMERIZATION_AND_OR_DEPOLYMERIZATION	17	-0.432052	-0.910046	0.611354	1	1	1580	tags=12%, list=14%, signal=14%
COENZYME_METABOLIC_PROCESS	28	-0.386049	-0.907895	0.612434	1	1	1237	tags=14%, list=11%, signal=16%
RESPONSE_TO_WOUNDING	56	-0.350517	-0.906923	0.620024	1	1	1592	tags=21%, list=14%, signal=25%
PROTEIN_AMINO_ACID_O_LINKED_GLYCOSYLATION	15	-0.432532	-0.901185	0.596774	1	1	2910	tags=40%, list=26%, signal=54%
GROWTH	46	-0.362404	-0.899457	0.649874	1	1	2125	tags=28%, list=19%, signal=35%
WOUND_HEALING	16	-0.423983	-0.899218	0.606461	1	1	1193	tags=19%, list=11%, signal=21%
NEGATIVE_REGULATION_OF_BINDING	15	-0.4268	-0.898044	0.597365	1	1	1828	tags=33%, list=17%, signal=40%
VESICLE_MEDIATED_TRANSPORT	144	-0.314216	-0.897422	0.699782	1	1	1203	tags=14%, list=11%, signal=15%
NEGATIVE_REGULATION_OF_TRANSCRIPTION	148	-0.310142	-0.894263	0.707343	1	1	2023	tags=18%, list=18%, signal=22%
RIBOSOME_BIOGENESIS_AND_ASSEMBLY	16	-0.418858	-0.889523	0.625931	1	1	5367	tags=88%, list=48%, signal=170%
HEMOPOIETIC_OR_LYMPHOID_ORGAN_DEVELOPMENT	34	-0.362687	-0.886827	0.627876	1	1	1413	tags=15%, list=13%, signal=17%
POSITIVE_REGULATION_OF_DEVELOPMENTAL_PROCESS	135	-0.309464	-0.88514	0.715835	1	1	1767	tags=17%, list=16%, signal=20%
REGULATION_OF_CELL_GROWTH	33	-0.368079	-0.884957	0.651832	1	1	1857	tags=27%, list=17%, signal=33%
REGULATION_OF_DNA_METABOLIC_PROCESS	36	-0.36269	-0.883832	0.629962	1	1	3749	tags=39%, list=34%, signal=59%
RESPONSE_TO_OXIDATIVE_STRESS	36	-0.365901	-0.877882	0.658065	1	1	831	tags=11%, list=8%, signal=12%
INFLAMMATORY_RESPONSE	36	-0.352846	-0.877322	0.654948	1	1	1592	tags=22%, list=14%, signal=26%
REGULATION_OF_CELL_DIFFERENTIATION	29	-0.370349	-0.876675	0.669666	1	1	1533	tags=21%, list=14%, signal=24%
CELL_PROLIFERATION_GO_0008283	278	-0.291913	-0.872838	0.789206	1	1	530	tags=6%, list=5%, signal=6%
ER_TO_GOLGI_VESICLE_MEDIATED_TRANSPORT	18	-0.404309	-0.871285	0.650817	1	1	3585	tags=50%, list=32%, signal=74%
SECRETORY_PATHWAY	66	-0.333671	-0.87056	0.688679	1	1	2036	tags=20%, list=18%, signal=24%
ACTIVATION_OF_PROTEIN_KINASE_ACTIVITY	19	-0.390216	-0.869517	0.653352	1	1	1492	tags=26%, list=13%, signal=30%
PROTEIN_TARGETING	95	-0.312968	-0.865891	0.71754	1	1	2880	tags=25%, list=26%, signal=34%
REGULATION_OF_TRANSLATION	48	-0.339816	-0.861108	0.691657	1	1	1896	tags=17%, list=17%, signal=20%
DEPHOSPHORYLATION	49	-0.33144	-0.859039	0.681013	1	1	921	tags=10%, list=8%, signal=11%
IMMUNE_SYSTEM_DEVELOPMENT	36	-0.350389	-0.859013	0.675291	1	1	1413	tags=14%, list=13%, signal=16%
ALCOHOL_METABOLIC_PROCESS	56	-0.330912	-0.858736	0.676719	1	1	1265	tags=16%, list=11%, signal=18%
NEGATIVE_REGULATION_OF_NUCLEOBASENUCLEOSIDENUCLEOTIDE_AND_NUCLEIC_ACID_METABOLIC_PROCESS	166	-0.296622	-0.8553	0.77014	1	1	2023	tags=17%, list=18%, signal=21%
REGULATION_OF_GROWTH	38	-0.348923	-0.854031	0.686032	1	1	2125	tags=29%, list=19%, signal=36%
NITROGEN_COMPOUND_METABOLIC_PROCESS	102	-0.304546	-0.853214	0.734807	1	1	1774	tags=17%, list=16%, signal=20%
PHOSPHOLIPID_METABOLIC_PROCESS	48	-0.334582	-0.851868	0.699874	1	1	1749	tags=17%, list=16%, signal=20%
REGULATION_OF_BINDING	37	-0.347265	-0.850754	0.694915	1	1	2082	tags=19%, list=19%, signal=23%
RESPONSE_TO_HORMONE_STIMULUS	23	-0.375436	-0.847683	0.68595	1	1	884	tags=9%, list=8%, signal=9%
ESTABLISHMENT_OF_PROTEIN_LOCALIZATION	146	-0.293733	-0.842148	0.796992	1	1	1938	tags=14%, list=17%, signal=17%
SECRETION_BY_CELL	79	-0.310794	-0.841525	0.742597	1	1	2036	tags=19%, list=18%, signal=23%
VIRAL_REPRODUCTIVE_PROCESS	21	-0.372515	-0.836839	0.697013	1	1	2513	tags=29%, list=23%, signal=37%
TRANSLATION	122	-0.294938	-0.833693	0.774973	1	1	2042	tags=12%, list=18%, signal=15%
TISSUE_DEVELOPMENT	49	-0.322338	-0.830006	0.75	1	1	1217	tags=16%, list=11%, signal=18%
ENZYME_LINKED_RECEPTOR_PROTEIN_SIGNALING_PATHWAY	77	-0.306423	-0.827146	0.770833	1	1	1242	tags=13%, list=11%, signal=15%
INTRACELLULAR_PROTEIN_TRANSPORT	123	-0.290718	-0.821156	0.802863	1	1	2880	tags=24%, list=26%, signal=32%
PROTEIN_AMINO_ACID_LIPIDATION	19	-0.372781	-0.820436	0.711078	1	1	1749	tags=21%, list=16%, signal=25%
LIPOPROTEIN_BIOSYNTHETIC_PROCESS	19	-0.372781	-0.820351	0.711142	1	1	1749	tags=21%, list=16%, signal=25%
HEMOPOIESIS	33	-0.338701	-0.817394	0.735648	1	1	1368	tags=12%, list=12%, signal=14%
PROTEIN_TRANSPORT	131	-0.288023	-0.815894	0.806134	1	1	2880	tags=24%, list=26%, signal=32%
GENERATION_OF_NEURONS	46	-0.317603	-0.812632	0.753442	1	1	1721	tags=20%, list=16%, signal=23%
PROTEIN_LOCALIZATION	164	-0.281146	-0.812579	0.846398	1	1	1849	tags=13%, list=17%, signal=16%
M_PHASE	92	-0.288174	-0.804499	0.82151	1	1	3109	tags=26%, list=28%, signal=36%
CARBOXYLIC_ACID_METABOLIC_PROCESS	108	-0.284376	-0.799055	0.815022	1	1	2231	tags=20%, list=20%, signal=25%
MICROTUBULE_BASED_PROCESS	75	-0.302464	-0.798149	0.808383	1	1	1342	tags=11%, list=12%, signal=12%
PROTEIN_MODIFICATION_PROCESS	451	-0.265189	-0.797157	0.946465	1	1	1967	tags=18%, list=18%, signal=21%
NEUROGENESIS	55	-0.302469	-0.790026	0.791563	1	1	1721	tags=16%, list=16%, signal=19%
NUCLEAR_IMPORT	41	-0.316537	-0.784151	0.790464	1	1	1938	tags=17%, list=17%, signal=21%
NEGATIVE_REGULATION_OF_TRANSFERASE_ACTIVITY	25	-0.340347	-0.782373	0.754316	1	1	928	tags=16%, list=8%, signal=17%
MACROMOLECULE_LOCALIZATION	181	-0.264773	-0.778895	0.895187	1	1	1849	tags=12%, list=17%, signal=14%
REGULATION_OF_CELLULAR_PROTEIN_METABOLIC_PROCESS	93	-0.280843	-0.776345	0.86036	1	1	1967	tags=16%, list=18%, signal=19%
DNA_DEPENDENT_DNA_REPLICATION	48	-0.306364	-0.776001	0.805897	1	1	3739	tags=38%, list=34%, signal=56%
PROTEIN_IMPORT_INTO_NUCLEUS	39	-0.320307	-0.775356	0.813893	1	1	1938	tags=18%, list=17%, signal=22%
BIOPOLYMER_MODIFICATION	467	-0.257476	-0.772494	0.972919	1	1	1967	tags=17%, list=18%, signal=20%
CYTOKINE_PRODUCTION	20	-0.345764	-0.766551	0.755073	1	1	1592	tags=25%, list=14%, signal=29%
CELL_SUBSTRATE_ADHESION	19	-0.343185	-0.758166	0.791785	1	1	536	tags=11%, list=5%, signal=11%
NEGATIVE_REGULATION_OF_BIOLOGICAL_PROCESS	447	-0.251039	-0.757528	0.977889	1	1	2023	tags=17%, list=18%, signal=20%
PEPTIDYL_AMINO_ACID_MODIFICATION	45	-0.302262	-0.757183	0.836634	1	1	383	tags=4%, list=3%, signal=5%
AXON_GUIDANCE	16	-0.358773	-0.754186	0.782486	1	1	430	tags=13%, list=4%, signal=13%
NEGATIVE_REGULATION_OF_METABOLIC_PROCESS	196	-0.255539	-0.751843	0.931651	1	1	2023	tags=18%, list=18%, signal=21%
REGULATION_OF_PROTEIN_METABOLIC_PROCESS	100	-0.273295	-0.751719	0.876254	1	1	1967	tags=16%, list=18%, signal=19%
NEGATIVE_REGULATION_OF_CELLULAR_METABOLIC_PROCESS	195	-0.256126	-0.748935	0.935789	1	1	2023	tags=18%, list=18%, signal=22%
CELL_DIVISION	18	-0.335758	-0.738603	0.799423	1	1	2980	tags=39%, list=27%, signal=53%
NEGATIVE_REGULATION_OF_GROWTH	31	-0.307895	-0.73823	0.855014	1	1	2125	tags=29%, list=19%, signal=36%
CELLULAR_CATABOLIC_PROCESS	156	-0.256613	-0.735755	0.924064	1	1	1835	tags=13%, list=17%, signal=15%
REGULATION_OF_DNA_BINDING	29	-0.310303	-0.733803	0.811189	1	1	2677	tags=28%, list=24%, signal=36%
CELL_MATRIX_ADHESION	19	-0.343185	-0.732646	0.804841	1	1	536	tags=11%, list=5%, signal=11%
ORGANIC_ACID_METABOLIC_PROCESS	110	-0.262311	-0.732637	0.913386	1	1	2231	tags=20%, list=20%, signal=25%
MITOSIS	71	-0.274193	-0.726774	0.900817	1	1	3109	tags=30%, list=28%, signal=41%
CELLULAR_CARBOHYDRATE_METABOLIC_PROCESS	84	-0.269001	-0.726306	0.910035	1	1	1602	tags=13%, list=14%, signal=15%
POSITIVE_REGULATION_OF_CELLULAR_COMPONENT_ORGANIZATION_AND_BIOGENESIS	24	-0.320675	-0.725875	0.838571	1	1	1076	tags=17%, list=10%, signal=18%
DOUBLE_STRAND_BREAK_REPAIR	22	-0.32513	-0.725597	0.8375	1	1	2472	tags=23%, list=22%, signal=29%
VIRAL_INFECTIOUS_CYCLE	18	-0.323264	-0.715465	0.836735	1	1	2513	tags=28%, list=23%, signal=36%
NEGATIVE_REGULATION_OF_CELLULAR_PROCESS	435	-0.237034	-0.713117	0.98995	1	1	2023	tags=17%, list=18%, signal=20%
BIOPOLYMER_CATABOLIC_PROCESS	99	-0.260049	-0.710253	0.929293	1	1	1931	tags=11%, list=17%, signal=13%
M_PHASE_OF_MITOTIC_CELL_CYCLE	74	-0.264958	-0.708	0.905263	1	1	3109	tags=28%, list=28%, signal=39%
MEMBRANE_FUSION	19	-0.320691	-0.70248	0.856083	1	1	977	tags=11%, list=9%, signal=12%
CELL_CYCLE_PHASE	138	-0.245659	-0.70173	0.958466	1	1	3122	tags=28%, list=28%, signal=38%
REGULATION_OF_GENE_EXPRESSION_EPIGENETIC	25	-0.3069	-0.70015	0.865819	1	1	2879	tags=32%, list=26%, signal=43%
PHOSPHOINOSITIDE_BIOSYNTHETIC_PROCESS	21	-0.312863	-0.698049	0.859375	1	1	1749	tags=19%, list=16%, signal=23%
CATABOLIC_PROCESS	164	-0.24315	-0.697361	0.970588	1	1	1931	tags=13%, list=17%, signal=15%
REGULATION_OF_SMALL_GTPASE_MEDIATED_SIGNAL_TRANSDUCTION	15	-0.334422	-0.694744	0.842647	1	1	1282	tags=20%, list=12%, signal=23%
PROTEIN_IMPORT	53	-0.267817	-0.694266	0.9239	1	1	1938	tags=17%, list=17%, signal=20%
VIRAL_REPRODUCTION	24	-0.300531	-0.694226	0.863448	1	1	2513	tags=25%, list=23%, signal=32%
MACROMOLECULE_CATABOLIC_PROCESS	110	-0.246951	-0.690864	0.948066	1	1	1931	tags=11%, list=17%, signal=13%
ER_NUCLEAR_SIGNALING_PATHWAY	15	-0.324796	-0.689451	0.851852	1	1	704	tags=13%, list=6%, signal=14%
LIPID_TRANSPORT	16	-0.319174	-0.689321	0.854257	1	1	1929	tags=19%, list=17%, signal=23%
ESTABLISHMENT_AND_OR_MAINTENANCE_OF_CHROMATIN_ARCHITECTURE	68	-0.254984	-0.68652	0.938628	1	1	2902	tags=25%, list=26%, signal=34%
MICROTUBULE_BASED_MOVEMENT	15	-0.323804	-0.683946	0.855365	1	1	614	tags=7%, list=6%, signal=7%
AMINE_METABOLIC_PROCESS	89	-0.250999	-0.68237	0.949367	1	1	2231	tags=19%, list=20%, signal=24%
DNA_DAMAGE_RESPONSESIGNAL_TRANSDUCTION	26	-0.291317	-0.678373	0.885315	1	1	3814	tags=46%, list=34%, signal=70%
HETEROCYCLE_METABOLIC_PROCESS	20	-0.310074	-0.675428	0.885201	1	1	262	tags=5%, list=2%, signal=5%
RNA_SPLICINGVIA_TRANSESTERIFICATION_REACTIONS	33	-0.282308	-0.675092	0.914209	1	1	3273	tags=30%, list=30%, signal=43%
REGULATION_OF_MITOSIS	33	-0.279745	-0.674847	0.912647	1	1	3039	tags=36%, list=27%, signal=50%
DNA_REPLICATION_INITIATION	15	-0.321087	-0.674699	0.868925	1	1	4278	tags=60%, list=39%, signal=98%
RNA_PROCESSING	159	-0.232941	-0.671663	0.98079	1	1	3805	tags=30%, list=34%, signal=45%
GLYCEROPHOSPHOLIPID_METABOLIC_PROCESS	32	-0.280959	-0.66918	0.896458	1	1	1749	tags=16%, list=16%, signal=19%
REGULATION_OF_BODY_FLUID_LEVELS	16	-0.314793	-0.668435	0.869369	1	1	1193	tags=13%, list=11%, signal=14%
PROTEIN_FOLDING	53	-0.259644	-0.666026	0.9375	1	1	4170	tags=47%, list=38%, signal=75%
CHROMATIN_ASSEMBLY	15	-0.319391	-0.661516	0.863965	1	1	2902	tags=33%, list=26%, signal=45%
RNA_SPLICING	86	-0.238962	-0.659877	0.962457	1	1	3992	tags=30%, list=36%, signal=47%
MRNA_METABOLIC_PROCESS	76	-0.242435	-0.659637	0.959064	1	1	4058	tags=33%, list=37%, signal=52%
CELLULAR_LOCALIZATION	285	-0.223242	-0.659577	0.997949	1	1	1005	tags=6%, list=9%, signal=6%
PROTEIN_HOMOOLIGOMERIZATION	15	-0.3175	-0.654922	0.891549	1	1	1828	tags=13%, list=17%, signal=16%
CELL_CYCLE_PROCESS	161	-0.227841	-0.654784	0.985138	1	1	3122	tags=27%, list=28%, signal=37%
MRNA_PROCESSING_GO_0006397	67	-0.24458	-0.653257	0.962785	1	1	4175	tags=34%, list=38%, signal=55%
ESTABLISHMENT_OF_CELLULAR_LOCALIZATION	276	-0.21729	-0.644861	0.996954	1	1	2162	tags=13%, list=20%, signal=16%
PROTEIN_OLIGOMERIZATION	28	-0.277395	-0.643297	0.918621	1	1	2590	tags=21%, list=23%, signal=28%
CHROMATIN_REMODELING	23	-0.285825	-0.642812	0.909836	1	1	2879	tags=26%, list=26%, signal=35%
RESPONSE_TO_HYPOXIA	20	-0.285928	-0.630124	0.90708	1	1	2426	tags=25%, list=22%, signal=32%
CYTOKINESIS	16	-0.297783	-0.626754	0.919283	1	1	2980	tags=38%, list=27%, signal=51%
DNA_METABOLIC_PROCESS	214	-0.213936	-0.62451	0.996859	1	1	3230	tags=23%, list=29%, signal=32%
REGULATION_OF_PROTEIN_STABILITY	16	-0.285984	-0.607764	0.931587	1	1	2424	tags=31%, list=22%, signal=40%
PROTEOLYSIS	120	-0.211904	-0.594858	1	1	1	1771	tags=13%, list=16%, signal=15%
NUCLEOCYTOPLASMIC_TRANSPORT	74	-0.218574	-0.583785	0.982079	1	1	3259	tags=26%, list=29%, signal=36%
REGULATION_OF_PROTEIN_MODIFICATION_PROCESS	25	-0.253235	-0.57886	0.945428	1	1	1967	tags=16%, list=18%, signal=19%
PHOSPHOINOSITIDE_METABOLIC_PROCESS	26	-0.247805	-0.572908	0.961589	1	1	1749	tags=15%, list=16%, signal=18%
TRNA_METABOLIC_PROCESS	19	-0.262598	-0.570006	0.946588	1	1	1995	tags=16%, list=18%, signal=19%
REGULATION_OF_TRANSCRIPTION_FACTOR_ACTIVITY	24	-0.24276	-0.565887	0.960544	1	1	2677	tags=29%, list=24%, signal=38%
MAINTENANCE_OF_LOCALIZATION	15	-0.276841	-0.563264	0.947917	1	1	526	tags=7%, list=5%, signal=7%
NEGATIVE_REGULATION_OF_DNA_METABOLIC_PROCESS	17	-0.258573	-0.551684	0.959821	1	1	4499	tags=53%, list=41%, signal=89%
POSITIVE_REGULATION_OF_PROTEIN_MODIFICATION_PROCESS	15	-0.263195	-0.549431	0.967164	1	1	1967	tags=20%, list=18%, signal=24%
NUCLEAR_TRANSPORT	75	-0.204609	-0.545917	0.996462	1	1	3259	tags=25%, list=29%, signal=36%
CHROMATIN_MODIFICATION	49	-0.209265	-0.534203	0.995056	1	1	3636	tags=33%, list=33%, signal=48%
TRANSCRIPTION_FROM_RNA_POLYMERASE_III_PROMOTER	18	-0.211695	-0.453942	0.988506	1	1	3923	tags=50%, list=35%, signal=77%
RIBONUCLEOPROTEIN_COMPLEX_BIOGENESIS_AND_ASSEMBLY	75	-0.164178	-0.442796	1	1	1	3972	tags=31%, list=36%, signal=47%
POSITIVE_REGULATION_OF_CELLULAR_PROTEIN_METABOLIC_PROCESS	31	-0.167427	-0.395673	1	1	1	1967	tags=16%, list=18%, signal=20%
POSITIVE_REGULATION_OF_PROTEIN_METABOLIC_PROCESS	32	-0.164903	-0.393952	1	1	1	1967	tags=16%, list=18%, signal=19%
RNA_CATABOLIC_PROCESS	17	-0.170541	-0.358071	0.997015	0.999743	1	1042	tags=6%, list=9%, signal=6%

## Sheet: combination_up
NAME	SIZE	ES	NES	NOM p-val	FDR q-val	FWER p-val	RANK AT MAX	LEADING EDGE
NEGATIVE_REGULATION_OF_CELL_CYCLE	64	0.570058	1.92916	0	0.0546259	0.05	1098	tags=25%, list=10%, signal=28%
ENDOSOME_TRANSPORT	19	0.67244	1.74988	0.00967742	0.240746	0.362	2423	tags=63%, list=22%, signal=81%
TRANSFORMING_GROWTH_FACTOR_BETA_RECEPTOR_SIGNALING_PATHWAY	21	0.635426	1.71543	0.0173611	0.219853	0.455	291	tags=19%, list=3%, signal=20%
REGULATION_OF_CYCLIN_DEPENDENT_PROTEIN_KINASE_ACTIVITY	41	0.524605	1.61031	0.00816326	0.416635	0.797	747	tags=17%, list=7%, signal=18%
CELL_CYCLE_ARREST_GO_0007050	46	0.50765	1.60986	0.00512821	0.334756	0.798	1238	tags=28%, list=11%, signal=32%
TRANSMEMBRANE_RECEPTOR_PROTEIN_SERINE_THREONINE_KINASE_SIGNALING_PATHWAY	29	0.548956	1.58167	0.0077821	0.35107	0.865	291	tags=14%, list=3%, signal=14%
REGULATION_OF_CELL_CYCLE	152	0.41313	1.56863	0	0.328358	0.886	819	tags=12%, list=7%, signal=13%
PROTEIN_POLYMERIZATION	15	0.624456	1.56541	0.0433437	0.292206	0.889	2024	tags=27%, list=18%, signal=33%
SULFUR_METABOLIC_PROCESS	27	0.489106	1.40996	0.080292	0.686172	1	1734	tags=41%, list=16%, signal=48%
ELECTRON_TRANSPORT_GO_0006118	35	0.456878	1.38625	0.0647773	0.705354	1	0	tags=3%, list=0%, signal=3%
NITROGEN_COMPOUND_CATABOLIC_PROCESS	17	0.531076	1.32958	0.164474	0.867459	1	592	tags=24%, list=5%, signal=25%
INTERPHASE_OF_MITOTIC_CELL_CYCLE	54	0.395302	1.27282	0.0913979	1	1	103	tags=6%, list=1%, signal=6%
ECTODERM_DEVELOPMENT	25	0.449434	1.23616	0.184564	1	1	1099	tags=24%, list=10%, signal=27%
BASE_EXCISION_REPAIR	15	0.495121	1.20907	0.212766	1	1	423	tags=13%, list=4%, signal=14%
CELL_CYCLE_GO_0007049	265	0.290006	1.20591	0.0454545	1	1	596	tags=7%, list=5%, signal=7%
REGULATION_OF_CELL_PROLIFERATION	159	0.305058	1.18169	0.0327869	1	1	1070	tags=14%, list=10%, signal=16%
INTERPHASE	58	0.357926	1.16252	0.195531	1	1	103	tags=5%, list=1%, signal=5%
PHOSPHORYLATION	207	0.288321	1.15203	0.107143	1	1	1832	tags=23%, list=17%, signal=27%
NEGATIVE_REGULATION_OF_CELL_PROLIFERATION	88	0.324291	1.14753	0.2	1	1	1362	tags=22%, list=12%, signal=24%
STEROID_METABOLIC_PROCESS	28	0.405095	1.14361	0.245211	1	1	1099	tags=18%, list=10%, signal=20%
AMINE_CATABOLIC_PROCESS	15	0.448302	1.12528	0.309091	1	1	592	tags=20%, list=5%, signal=21%
REGULATION_OF_PHOSPHORYLATION	26	0.389932	1.12373	0.26259	1	1	212	tags=12%, list=2%, signal=12%
INSULIN_RECEPTOR_SIGNALING_PATHWAY	16	0.42966	1.11651	0.302941	1	1	1638	tags=44%, list=15%, signal=51%
RHO_PROTEIN_SIGNAL_TRANSDUCTION	22	0.412536	1.11437	0.298182	1	1	219	tags=14%, list=2%, signal=14%
RESPONSE_TO_NUTRIENT_LEVELS	15	0.45407	1.11224	0.315942	1	1	991	tags=33%, list=9%, signal=37%
MICROTUBULE_ORGANIZING_CENTER_ORGANIZATION_AND_BIOGENESIS	15	0.456203	1.10341	0.352201	1	1	2290	tags=33%, list=21%, signal=42%
MYELOID_CELL_DIFFERENTIATION	20	0.419599	1.09891	0.303406	1	1	2300	tags=30%, list=21%, signal=38%
POSITIVE_REGULATION_OF_CELL_PROLIFERATION	64	0.320113	1.09758	0.301887	0.999101	1	1070	tags=13%, list=10%, signal=14%
MITOTIC_CELL_CYCLE_CHECKPOINT	18	0.43047	1.09688	0.323171	0.967517	1	44	tags=6%, list=0%, signal=6%
RESPONSE_TO_EXTRACELLULAR_STIMULUS	18	0.416329	1.09309	0.329825	0.950041	1	991	tags=28%, list=9%, signal=30%
REGULATION_OF_RESPONSE_TO_STIMULUS	17	0.417354	1.07151	0.358824	1	1	1690	tags=35%, list=15%, signal=42%
NEURITE_DEVELOPMENT	32	0.352985	1.06398	0.318725	1	1	1120	tags=25%, list=10%, signal=28%
CELLULAR_MORPHOGENESIS_DURING_DIFFERENTIATION	31	0.35955	1.0485	0.335907	1	1	1120	tags=26%, list=10%, signal=29%
AXONOGENESIS	26	0.365826	1.04551	0.37457	1	1	1120	tags=27%, list=10%, signal=30%
PROTEIN_AMINO_ACID_DEPHOSPHORYLATION	43	0.331726	1.04149	0.376238	1	1	755	tags=19%, list=7%, signal=20%
GOLGI_VESICLE_TRANSPORT	47	0.330666	1.04119	0.379747	0.987412	1	2276	tags=30%, list=21%, signal=37%
NEGATIVE_REGULATION_OF_SIGNAL_TRANSDUCTION	22	0.376227	1.03795	0.398026	0.973307	1	1299	tags=27%, list=12%, signal=31%
POST_TRANSLATIONAL_PROTEIN_MODIFICATION	331	0.240032	1.02577	0.307692	0.994773	1	1924	tags=22%, list=17%, signal=26%
REGULATION_OF_CELL_ADHESION	15	0.421274	1.02268	0.425532	0.98122	1	2717	tags=40%, list=25%, signal=53%
GENERATION_OF_PRECURSOR_METABOLITES_AND_ENERGY	88	0.279386	0.99124	0.453125	1	1	554	tags=7%, list=5%, signal=7%
NEGATIVE_REGULATION_OF_CELLULAR_PROTEIN_METABOLIC_PROCESS	25	0.354486	0.98473	0.493056	1	1	472	tags=12%, list=4%, signal=13%
HOMEOSTASIS_OF_NUMBER_OF_CELLS	15	0.396827	0.982265	0.447853	1	1	770	tags=13%, list=7%, signal=14%
ONE_CARBON_COMPOUND_METABOLIC_PROCESS	22	0.351757	0.97725	0.472028	1	1	646	tags=9%, list=6%, signal=10%
PROTEIN_AMINO_ACID_PHOSPHORYLATION	182	0.247798	0.974457	0.561404	1	1	1924	tags=23%, list=17%, signal=27%
REGULATION_OF_ANATOMICAL_STRUCTURE_MORPHOGENESIS	15	0.401993	0.961124	0.514852	1	1	2307	tags=40%, list=21%, signal=50%
EPIDERMIS_DEVELOPMENT	19	0.358898	0.947201	0.531148	1	1	1099	tags=16%, list=10%, signal=17%
NEURON_DEVELOPMENT	35	0.322655	0.946266	0.540179	1	1	1412	tags=29%, list=13%, signal=33%
NEGATIVE_REGULATION_OF_PROTEIN_METABOLIC_PROCESS	27	0.340839	0.942265	0.542735	1	1	472	tags=11%, list=4%, signal=12%
JAK_STAT_CASCADE	17	0.384061	0.941459	0.501577	1	1	2403	tags=41%, list=22%, signal=53%
PEPTIDYL_TYROSINE_MODIFICATION	15	0.369598	0.918649	0.556575	1	1	1539	tags=33%, list=14%, signal=39%
AMINO_ACID_METABOLIC_PROCESS	52	0.278906	0.915367	0.612565	1	1	1634	tags=21%, list=15%, signal=25%
PEROXISOME_ORGANIZATION_AND_BIOGENESIS	15	0.369504	0.907091	0.56129	1	1	2944	tags=53%, list=27%, signal=73%
REGULATION_OF_IMMUNE_SYSTEM_PROCESS	19	0.344145	0.901308	0.603279	1	1	2822	tags=47%, list=25%, signal=63%
NEURON_DIFFERENTIATION	42	0.281361	0.878528	0.737991	1	1	1196	tags=21%, list=11%, signal=24%
ENERGY_DERIVATION_BY_OXIDATION_OF_ORGANIC_COMPOUNDS	29	0.304433	0.869905	0.67382	1	1	554	tags=10%, list=5%, signal=11%
POSITIVE_REGULATION_OF_IMMUNE_SYSTEM_PROCESS	17	0.352172	0.869684	0.611285	1	1	2822	tags=47%, list=25%, signal=63%
RESPONSE_TO_STRESS	311	0.219247	0.865401	1	1	1	1076	tags=11%, list=10%, signal=12%
MICROTUBULE_CYTOSKELETON_ORGANIZATION_AND_BIOGENESIS	35	0.287235	0.85804	0.672	1	1	1861	tags=20%, list=17%, signal=24%
CELLULAR_RESPIRATION	17	0.334238	0.847119	0.673846	1	1	7378	tags=100%, list=67%, signal=299%
AMINO_ACID_AND_DERIVATIVE_METABOLIC_PROCESS	67	0.249543	0.844041	0.776316	1	1	1634	tags=19%, list=15%, signal=23%
MITOTIC_CELL_CYCLE	130	0.220538	0.838809	0.934211	1	1	565	tags=4%, list=5%, signal=4%
PROTEIN_PROCESSING	37	0.273834	0.830124	0.756637	1	1	1190	tags=19%, list=11%, signal=21%
PROTEIN_AMINO_ACID_AUTOPHOSPHORYLATION	25	0.290091	0.812438	0.736641	1	1	1607	tags=24%, list=15%, signal=28%
NUCLEOTIDE_EXCISION_REPAIR	19	0.312855	0.810945	0.690402	1	1	1362	tags=21%, list=12%, signal=24%
PROTEIN_AUTOPROCESSING	25	0.290091	0.810472	0.784672	1	1	1607	tags=24%, list=15%, signal=28%
REGULATION_OF_TRANSLATIONAL_INITIATION	25	0.285894	0.793528	0.793333	1	1	127	tags=4%, list=1%, signal=4%
UBIQUITIN_CYCLE	42	0.256148	0.787796	0.829493	1	1	1903	tags=21%, list=17%, signal=26%
DNA_REPAIR	111	0.209555	0.785924	0.910891	1	1	2859	tags=25%, list=26%, signal=34%
CELLULAR_MACROMOLECULE_CATABOLIC_PROCESS	83	0.22821	0.78235	0.888112	1	1	3003	tags=30%, list=27%, signal=41%
NEGATIVE_REGULATION_OF_CELLULAR_COMPONENT_ORGANIZATION_AND_BIOGENESIS	23	0.278086	0.77885	0.823741	1	1	2419	tags=22%, list=22%, signal=28%
TRANSLATIONAL_INITIATION	32	0.258316	0.758394	0.834783	1	1	127	tags=3%, list=1%, signal=3%
INTRACELLULAR_TRANSPORT	237	0.186093	0.74883	1	1	1	1061	tags=10%, list=10%, signal=11%
ORGANELLE_LOCALIZATION	19	0.284141	0.747695	0.839744	1	1	2470	tags=37%, list=22%, signal=47%
RNA_EXPORT_FROM_NUCLEUS	16	0.282485	0.717043	0.87541	1	1	7950	tags=100%, list=72%, signal=354%
CELL_CYCLE_CHECKPOINT_GO_0000075	44	0.228001	0.714212	0.93913	1	1	339	tags=5%, list=3%, signal=5%
CELLULAR_PROTEIN_CATABOLIC_PROCESS	53	0.210223	0.713038	0.957944	1	1	3003	tags=30%, list=27%, signal=41%
RESPONSE_TO_DNA_DAMAGE_STIMULUS	138	0.186849	0.709408	1	1	1	1362	tags=10%, list=12%, signal=11%
G1_S_TRANSITION_OF_MITOTIC_CELL_CYCLE	24	0.246457	0.707011	0.870079	1	1	103	tags=4%, list=1%, signal=4%
HISTONE_MODIFICATION	20	0.262726	0.7018	0.905594	1	1	2258	tags=25%, list=20%, signal=31%
PROTEIN_UBIQUITINATION	35	0.237033	0.701542	0.925764	1	1	2372	tags=26%, list=21%, signal=33%
AMINO_ACID_DERIVATIVE_METABOLIC_PROCESS	15	0.272921	0.685635	0.877143	1	1	2471	tags=27%, list=22%, signal=34%
PROTEIN_MODIFICATION_BY_SMALL_PROTEIN_CONJUGATION	38	0.227571	0.68355	0.952586	1	1	2372	tags=24%, list=21%, signal=30%
NUCLEAR_EXPORT	29	0.238095	0.67668	0.909465	1	1	8444	tags=100%, list=76%, signal=420%
SPLICEOSOME_ASSEMBLY	19	0.254794	0.674946	0.897611	1	1	8257	tags=100%, list=75%, signal=392%
CYTOSKELETON_DEPENDENT_INTRACELLULAR_TRANSPORT	21	0.241637	0.647165	0.944649	1	1	3331	tags=43%, list=30%, signal=61%
COVALENT_CHROMATIN_MODIFICATION	21	0.240264	0.646855	0.908425	1	1	2258	tags=24%, list=20%, signal=30%
RESPONSE_TO_ENDOGENOUS_STIMULUS	159	0.159555	0.616823	1	1	1	1404	tags=11%, list=13%, signal=12%
PROTEIN_CATABOLIC_PROCESS	60	0.172851	0.576801	1	1	1	3368	tags=33%, list=30%, signal=48%
DNA_REPLICATION	86	0.159897	0.564389	1	1	1	103	tags=2%, list=1%, signal=2%
PROTEIN_RNA_COMPLEX_ASSEMBLY	58	0.166302	0.558921	1	1	1	127	tags=2%, list=1%, signal=2%
REGULATION_OF_MITOTIC_CELL_CYCLE	17	0.211266	0.550922	0.976589	1	1	2175	tags=24%, list=20%, signal=29%
GLUCOSE_METABOLIC_PROCESS	20	0.204056	0.534133	0.983108	0.999017	1	2202	tags=20%, list=20%, signal=25%
POSITIVE_REGULATION_OF_BINDING	15	0.188065	0.471179	0.984227	0.99613	1	8994	tags=100%, list=81%, signal=531%
